# Supplementary material
Source: publisher figshare collection journal article supplement (https://gsajournals.figshare.com/ndownloader/files/19068680)
Supplement: Supplementary file 1 [file 19068680]

## Sheet: Table S4
Table S4. Significantly different pathways
Isoform usage, RES day 0 vs RES day 3
Term	Count	%	PValue	Genes	List Total	Pop Hits	Pop Total	Fold Enrichment	Bonferroni	Benjamini	FDR
mmu05100:Bacterial invasion of epithelial cells	15	1.35993	0.000115449	ENSMUSG00000026276, ENSMUSG00000062825, ENSMUSG00000059248, ENSMUSG00000079426, ENSMUSG00000006932, ENSMUSG00000031165, ENSMUSG00000025809, ENSMUSG00000029621, ENSMUSG00000020573, ENSMUSG00000000058, ENSMUSG00000018398, ENSMUSG00000047126, ENSMUSG00000029684, ENSMUSG00000058013, ENSMUSG00000007655	443	78	7720	3.35128	0.0291241	0.0291241	0.150434
mmu05212:Pancreatic cancer	13	1.1786	0.00026802	ENSMUSG00000070348, ENSMUSG00000030265, ENSMUSG00000063358, ENSMUSG00000031537, ENSMUSG00000026104, ENSMUSG00000001127, ENSMUSG00000002413, ENSMUSG00000020573, ENSMUSG00000024515, ENSMUSG00000022105, ENSMUSG00000041147, ENSMUSG00000004040, ENSMUSG00000008859	443	65	7720	3.48533	0.0663208	0.0337292	0.348919
mmu04144:Endocytosis	31	2.81052	0.00055862	ENSMUSG00000052632, ENSMUSG00000079426, ENSMUSG00000031165, ENSMUSG00000020375, ENSMUSG00000015656, ENSMUSG00000006058, ENSMUSG00000004843, ENSMUSG00000000058, ENSMUSG00000022841, ENSMUSG00000028745, ENSMUSG00000032812, ENSMUSG00000029684, ENSMUSG00000067235, ENSMUSG00000000743, ENSMUSG00000060216, ENSMUSG00000056116, ENSMUSG00000015733, ENSMUSG00000029621, ENSMUSG00000018820, ENSMUSG00000022150,…	443	278	7720	1.94326	0.133286	0.0465633	0.725963
mmu04062:Chemokine signaling pathway	24	2.17588	0.000781414	ENSMUSG00000060216, ENSMUSG00000048756, ENSMUSG00000031165, ENSMUSG00000030265, ENSMUSG00000018920, ENSMUSG00000063358, ENSMUSG00000031537, ENSMUSG00000039621, ENSMUSG00000026104, ENSMUSG00000043004, ENSMUSG00000002413, ENSMUSG00000029713, ENSMUSG00000031659, ENSMUSG00000020573, ENSMUSG00000003283, ENSMUSG00000040061, ENSMUSG00000021948, ENSMUSG00000029064, ENSMUSG00000029684, ENSMUSG00000004040,…	443	196	7720	2.13387	0.181368	0.0487992	1.01414
mmu04380:Osteoclast differentiation	18	1.63191	0.000792489	ENSMUSG00000000440, ENSMUSG00000026656, ENSMUSG00000063358, ENSMUSG00000019843, ENSMUSG00000031537, ENSMUSG00000021457, ENSMUSG00000026104, ENSMUSG00000002325, ENSMUSG00000074677, ENSMUSG00000020573, ENSMUSG00000028284, ENSMUSG00000022971, ENSMUSG00000015340, ENSMUSG00000021816, ENSMUSG00000058818, ENSMUSG00000030427, ENSMUSG00000023992, ENSMUSG00000033016	443	126	7720	2.48952	0.183687	0.0397787	1.02844
mmu04666:Fc gamma R-mediated phagocytosis	14	1.26927	0.000892959	ENSMUSG00000020573, ENSMUSG00000052632, ENSMUSG00000079426, ENSMUSG00000003283, ENSMUSG00000031165, ENSMUSG00000026656, ENSMUSG00000029621, ENSMUSG00000021948, ENSMUSG00000029684, ENSMUSG00000063358, ENSMUSG00000034902, ENSMUSG00000026395, ENSMUSG00000016933, ENSMUSG00000021457	443	84	7720	2.90444	0.204433	0.0373993	1.15813
mmu05216:Thyroid cancer	8	0.725295	0.000997397	ENSMUSG00000000440, ENSMUSG00000006932, ENSMUSG00000027940, ENSMUSG00000070348, ENSMUSG00000030265, ENSMUSG00000063358, ENSMUSG00000024985, ENSMUSG00000002413	443	29	7720	4.80735	0.225441	0.0358365	1.29277
mmu04915:Estrogen signaling pathway	15	1.35993	0.00128891	ENSMUSG00000001175, ENSMUSG00000030265, ENSMUSG00000015656, ENSMUSG00000063358, ENSMUSG00000030102, ENSMUSG00000024462, ENSMUSG00000024639, ENSMUSG00000031740, ENSMUSG00000031659, ENSMUSG00000020573, ENSMUSG00000040061, ENSMUSG00000027230, ENSMUSG00000021948, ENSMUSG00000024222, ENSMUSG00000020654	443	98	7720	2.66734	0.2812	0.0404315	1.66768
mmu04520:Adherens junction	12	1.08794	0.00242633	ENSMUSG00000062825, ENSMUSG00000024515, ENSMUSG00000028284, ENSMUSG00000006932, ENSMUSG00000027540, ENSMUSG00000031165, ENSMUSG00000054808, ENSMUSG00000029684, ENSMUSG00000019843, ENSMUSG00000063358, ENSMUSG00000068036, ENSMUSG00000024985	443	72	7720	2.90444	0.463074	0.0667662	3.118
mmu04921:Oxytocin signaling pathway	19	1.72257	0.00390185	ENSMUSG00000062825, ENSMUSG00000001175, ENSMUSG00000053819, ENSMUSG00000070348, ENSMUSG00000030265, ENSMUSG00000063358, ENSMUSG00000030102, ENSMUSG00000030272, ENSMUSG00000024639, ENSMUSG00000031659, ENSMUSG00000020573, ENSMUSG00000014956, ENSMUSG00000017412, ENSMUSG00000040061, ENSMUSG00000009292, ENSMUSG00000021816, ENSMUSG00000027931, ENSMUSG00000033016, ENSMUSG00000020654	443	158	7720	2.09561	0.632425	0.0952375	4.96998
mmu04720:Long-term potentiation	11	0.99728	0.00401079	ENSMUSG00000001175, ENSMUSG00000014956, ENSMUSG00000040061, ENSMUSG00000053819, ENSMUSG00000030265, ENSMUSG00000063358, ENSMUSG00000021816, ENSMUSG00000030102, ENSMUSG00000001127, ENSMUSG00000002413, ENSMUSG00000024639	443	66	7720	2.90444	0.642574	0.089289	5.10541
mmu05223:Non-small cell lung cancer	10	0.906618	0.00416817	ENSMUSG00000020573, ENSMUSG00000022105, ENSMUSG00000048756, ENSMUSG00000070348, ENSMUSG00000030265, ENSMUSG00000063358, ENSMUSG00000016933, ENSMUSG00000010067, ENSMUSG00000001127, ENSMUSG00000002413	443	56	7720	3.1119	0.656745	0.0852522	5.30075
mmu05221:Acute myeloid leukemia	10	0.906618	0.00416817	ENSMUSG00000037992, ENSMUSG00000020573, ENSMUSG00000070348, ENSMUSG00000030265, ENSMUSG00000063358, ENSMUSG00000004040, ENSMUSG00000031537, ENSMUSG00000001127, ENSMUSG00000024985, ENSMUSG00000002413	443	56	7720	3.1119	0.656745	0.0852522	5.30075
mmu05145:Toxoplasmosis	15	1.35993	0.0049547	ENSMUSG00000039005, ENSMUSG00000025860, ENSMUSG00000046879, ENSMUSG00000025809, ENSMUSG00000015656, ENSMUSG00000063358, ENSMUSG00000031537, ENSMUSG00000063694, ENSMUSG00000026104, ENSMUSG00000025701, ENSMUSG00000020573, ENSMUSG00000028284, ENSMUSG00000022969, ENSMUSG00000004040, ENSMUSG00000078853	443	113	7720	2.31327	0.719605	0.0931806	6.27142
mmu04810:Regulation of actin cytoskeleton	23	2.08522	0.00534653	ENSMUSG00000062825, ENSMUSG00000040940, ENSMUSG00000079426, ENSMUSG00000031165, ENSMUSG00000018293, ENSMUSG00000030265, ENSMUSG00000025809, ENSMUSG00000029621, ENSMUSG00000063358, ENSMUSG00000027009, ENSMUSG00000049775, ENSMUSG00000042121, ENSMUSG00000001127, ENSMUSG00000002413, ENSMUSG00000022781, ENSMUSG00000020573, ENSMUSG00000030786, ENSMUSG00000030447, ENSMUSG00000014956, ENSMUSG00000020611,…	443	214	7720	1.87296	0.746498	0.0933759	6.75154
mmu05152:Tuberculosis	20	1.81324	0.00555321	ENSMUSG00000039005, ENSMUSG00000001175, ENSMUSG00000028238, ENSMUSG00000038642, ENSMUSG00000053819, ENSMUSG00000026656, ENSMUSG00000007891, ENSMUSG00000063358, ENSMUSG00000001750, ENSMUSG00000021457, ENSMUSG00000030142, ENSMUSG00000063694, ENSMUSG00000026104, ENSMUSG00000016534, ENSMUSG00000030786, ENSMUSG00000022969, ENSMUSG00000024610, ENSMUSG00000021816, ENSMUSG00000032041, ENSMUSG00000026712	443	176	7720	1.9803	0.759632	0.0906625	7.00389
mmu05205:Proteoglycans in cancer	22	1.99456	0.00598519	ENSMUSG00000062825, ENSMUSG00000039005, ENSMUSG00000040940, ENSMUSG00000020719, ENSMUSG00000006932, ENSMUSG00000053819, ENSMUSG00000070348, ENSMUSG00000030265, ENSMUSG00000025809, ENSMUSG00000063358, ENSMUSG00000030102, ENSMUSG00000001127, ENSMUSG00000002413, ENSMUSG00000031740, ENSMUSG00000020573, ENSMUSG00000014956, ENSMUSG00000000058, ENSMUSG00000065455, ENSMUSG00000004040, ENSMUSG00000016933,…	443	203	7720	1.8886	0.784934	0.0915821	7.52926
Isoform usage, RES day 3 vs RES day 6
Term	Count	%	PValue	Genes	List Total	Pop Hits	Pop Total	Fold Enrichment	Bonferroni	Benjamini	FDR
mmu00053:Ascorbate and aldarate metabolism	8	2.71186	3.82156e-07	ENSMUSG00000090165, ENSMUSG00000089960, ENSMUSG00000089943, ENSMUSG00000090175, ENSMUSG00000054545, ENSMUSG00000090145, ENSMUSG00000090171, ENSMUSG00000090124	142	27	7720	16.1085	7.68104e-05	7.68104e-05	0.000479383
mmu00860:Porphyrin and chlorophyll metabolism	9	3.05085	5.8304e-07	ENSMUSG00000090165, ENSMUSG00000089960, ENSMUSG00000003617, ENSMUSG00000089943, ENSMUSG00000090175, ENSMUSG00000054545, ENSMUSG00000090145, ENSMUSG00000090171, ENSMUSG00000090124	142	41	7720	11.934	0.000117184	5.85938e-05	0.000731375
mmu00040:Pentose and glucuronate interconversions	8	2.71186	3.13117e-06	ENSMUSG00000090165, ENSMUSG00000089960, ENSMUSG00000089943, ENSMUSG00000090175, ENSMUSG00000054545, ENSMUSG00000090145, ENSMUSG00000090171, ENSMUSG00000090124	142	36	7720	12.0814	0.000629168	0.000209767	0.00392773
mmu00983:Drug metabolism - other enzymes	9	3.05085	3.3311e-06	ENSMUSG00000090165, ENSMUSG00000089960, ENSMUSG00000089943, ENSMUSG00000090175, ENSMUSG00000054545, ENSMUSG00000025574, ENSMUSG00000090145, ENSMUSG00000090171, ENSMUSG00000090124	142	51	7720	9.59403	0.000669329	0.000167374	0.00417852
mmu00980:Metabolism of xenobiotics by cytochrome P450	9	3.05085	1.89592e-05	ENSMUSG00000008540, ENSMUSG00000090165, ENSMUSG00000089960, ENSMUSG00000089943, ENSMUSG00000090175, ENSMUSG00000054545, ENSMUSG00000090145, ENSMUSG00000090171, ENSMUSG00000090124	142	64	7720	7.64525	0.00380358	0.000761875	0.0237801
mmu00982:Drug metabolism - cytochrome P450	9	3.05085	2.38577e-05	ENSMUSG00000008540, ENSMUSG00000090165, ENSMUSG00000089960, ENSMUSG00000089943, ENSMUSG00000090175, ENSMUSG00000054545, ENSMUSG00000090145, ENSMUSG00000090171, ENSMUSG00000090124	142	66	7720	7.41357	0.00478397	0.000798922	0.0299234
mmu00140:Steroid hormone biosynthesis	9	3.05085	0.000175863	ENSMUSG00000090165, ENSMUSG00000089960, ENSMUSG00000089943, ENSMUSG00000090175, ENSMUSG00000054545, ENSMUSG00000090145, ENSMUSG00000090171, ENSMUSG00000090124, ENSMUSG00000073422	142	87	7720	5.62409	0.034734	0.00503749	0.220382
mmu05204:Chemical carcinogenesis	9	3.05085	0.000259484	ENSMUSG00000008540, ENSMUSG00000090165, ENSMUSG00000089960, ENSMUSG00000089943, ENSMUSG00000090175, ENSMUSG00000054545, ENSMUSG00000090145, ENSMUSG00000090171, ENSMUSG00000090124	142	92	7720	5.31843	0.0508258	0.00649916	0.325014
mmu00830:Retinol metabolism	8	2.71186	0.00115557	ENSMUSG00000090165, ENSMUSG00000089960, ENSMUSG00000089943, ENSMUSG00000090175, ENSMUSG00000054545, ENSMUSG00000090145, ENSMUSG00000090171, ENSMUSG00000090124	142	89	7720	4.88685	0.207375	0.0254922	1.43995
Isoform usage, RES day 6 vs RES day 9
No significantly different pathways
Isoform usage, RES day 9 vs RES day 12
Term	Count	%	PValue	Genes	List Total	Pop Hits	Pop Total	Fold Enrichment	Bonferroni	Benjamini	FDR
mmu03010:Ribosome	8	6.25	0.000448739	ENSMUSG00000007892, ENSMUSG00000025508, ENSMUSG00000029614, ENSMUSG00000060036, ENSMUSG00000047675, ENSMUSG00000025794, ENSMUSG00000061787, ENSMUSG00000032518	75	145	7720	5.67908	0.0532862	0.0532862	0.515446
mmu04142:Lysosome	7	5.46875	0.00106171	ENSMUSG00000038642, ENSMUSG00000019087, ENSMUSG00000017760, ENSMUSG00000034707, ENSMUSG00000007891, ENSMUSG00000001348, ENSMUSG00000015474	75	122	7720	5.90601	0.121551	0.062744	1.21562
Isoform usage, REC day 3 vs REC day 6
Term	Count	%	PValue	Genes	List Total	Pop Hits	Pop Total	Fold Enrichment	Bonferroni	Benjamini	FDR
mmu00860:Porphyrin and chlorophyll metabolism	10	1.49477	9.25242e-06	ENSMUSG00000090165, ENSMUSG00000026615, ENSMUSG00000089960, ENSMUSG00000089943, ENSMUSG00000030979, ENSMUSG00000090175, ENSMUSG00000054545, ENSMUSG00000090145, ENSMUSG00000090171, ENSMUSG00000090124	272	41	7720	6.92253	0.00225505	0.00225505	0.0119732
mmu00053:Ascorbate and aldarate metabolism	8	1.19581	2.95145e-05	ENSMUSG00000090165, ENSMUSG00000089960, ENSMUSG00000089943, ENSMUSG00000090175, ENSMUSG00000054545, ENSMUSG00000090145, ENSMUSG00000090171, ENSMUSG00000090124	272	27	7720	8.40959	0.00717578	0.00359435	0.0381889
mmu04144:Endocytosis	24	3.58744	0.000109482	ENSMUSG00000079426, ENSMUSG00000053835, ENSMUSG00000056116, ENSMUSG00000037062, ENSMUSG00000029462, ENSMUSG00000015656, ENSMUSG00000022150, ENSMUSG00000060550, ENSMUSG00000029465, ENSMUSG00000006058, ENSMUSG00000061232, ENSMUSG00000036986, ENSMUSG00000040022, ENSMUSG00000017132, ENSMUSG00000073411, ENSMUSG00000027598, ENSMUSG00000038740, ENSMUSG00000062960, ENSMUSG00000032812, ENSMUSG00000067235,…	272	278	7720	2.45028	0.0263614	0.00886549	0.141591
mmu05168:Herpes simplex infection	20	2.98954	0.000121068	ENSMUSG00000034120, ENSMUSG00000042349, ENSMUSG00000053835, ENSMUSG00000056116, ENSMUSG00000055116, ENSMUSG00000026875, ENSMUSG00000031537, ENSMUSG00000060550, ENSMUSG00000026104, ENSMUSG00000002325, ENSMUSG00000036986, ENSMUSG00000061232, ENSMUSG00000073411, ENSMUSG00000021250, ENSMUSG00000004865, ENSMUSG00000022971, ENSMUSG00000025358, ENSMUSG00000059552, ENSMUSG00000067235, ENSMUSG00000037321	272	208	7720	2.72907	0.0291103	0.0073584	0.156565
mmu04612:Antigen processing and presentation	12	1.79372	0.000124454	ENSMUSG00000073411, ENSMUSG00000053835, ENSMUSG00000056116, ENSMUSG00000024308, ENSMUSG00000022216, ENSMUSG00000078153, ENSMUSG00000015656, ENSMUSG00000079197, ENSMUSG00000067235, ENSMUSG00000060550, ENSMUSG00000037321, ENSMUSG00000061232	272	82	7720	4.15352	0.0299122	0.00605532	0.16094
mmu05169:Epstein-Barr virus infection	20	2.98954	0.000188175	ENSMUSG00000025225, ENSMUSG00000053835, ENSMUSG00000056116, ENSMUSG00000026875, ENSMUSG00000015656, ENSMUSG00000031537, ENSMUSG00000060550, ENSMUSG00000021457, ENSMUSG00000017428, ENSMUSG00000061232, ENSMUSG00000022812, ENSMUSG00000073411, ENSMUSG00000026229, ENSMUSG00000022969, ENSMUSG00000025358, ENSMUSG00000059552, ENSMUSG00000067235, ENSMUSG00000005087, ENSMUSG00000008855, ENSMUSG00000032462	272	215	7720	2.64022	0.0448807	0.00762397	0.24325
mmu00040:Pentose and glucuronate interconversions	8	1.19581	0.000211598	ENSMUSG00000090165, ENSMUSG00000089960, ENSMUSG00000089943, ENSMUSG00000090175, ENSMUSG00000054545, ENSMUSG00000090145, ENSMUSG00000090171, ENSMUSG00000090124	272	36	7720	6.30719	0.0503248	0.00734933	0.273489
mmu04380:Osteoclast differentiation	13	1.9432	0.00151245	ENSMUSG00000025225, ENSMUSG00000021250, ENSMUSG00000022971, ENSMUSG00000095788, ENSMUSG00000058818, ENSMUSG00000063358, ENSMUSG00000031537, ENSMUSG00000021457, ENSMUSG00000001348, ENSMUSG00000026104, ENSMUSG00000032462, ENSMUSG00000002325, ENSMUSG00000026072	272	126	7720	2.92834	0.308793	0.0451152	1.93972
mmu00980:Metabolism of xenobiotics by cytochrome P450	9	1.34529	0.00167149	ENSMUSG00000090165, ENSMUSG00000089960, ENSMUSG00000001665, ENSMUSG00000089943, ENSMUSG00000090175, ENSMUSG00000054545, ENSMUSG00000090145, ENSMUSG00000090171, ENSMUSG00000090124	272	64	7720	3.99127	0.335143	0.0443406	2.14166
mmu05416:Viral myocarditis	10	1.49477	0.00169528	ENSMUSG00000073411, ENSMUSG00000029580, ENSMUSG00000053835, ENSMUSG00000056116, ENSMUSG00000067235, ENSMUSG00000060550, ENSMUSG00000000290, ENSMUSG00000007655, ENSMUSG00000045983, ENSMUSG00000061232	272	79	7720	3.5927	0.338999	0.0405547	2.17185
mmu00983:Drug metabolism - other enzymes	8	1.19581	0.00187322	ENSMUSG00000090165, ENSMUSG00000089960, ENSMUSG00000089943, ENSMUSG00000090175, ENSMUSG00000054545, ENSMUSG00000090145, ENSMUSG00000090171, ENSMUSG00000090124	272	51	7720	4.45213	0.367132	0.0407373	2.39726
mmu00982:Drug metabolism - cytochrome P450	9	1.34529	0.00204194	ENSMUSG00000090165, ENSMUSG00000089960, ENSMUSG00000001665, ENSMUSG00000089943, ENSMUSG00000090175, ENSMUSG00000054545, ENSMUSG00000090145, ENSMUSG00000090171, ENSMUSG00000090124	272	66	7720	3.87032	0.392707	0.0407101	2.61056
mmu01100:Metabolic pathways	64	9.56652	0.00237096	ENSMUSG00000066442, ENSMUSG00000021036, ENSMUSG00000062646, ENSMUSG00000020471, ENSMUSG00000017307, ENSMUSG00000060675, ENSMUSG00000021360, ENSMUSG00000006057, ENSMUSG00000028980, ENSMUSG00000022885, ENSMUSG00000002416, ENSMUSG00000090165, ENSMUSG00000033379, ENSMUSG00000029063, ENSMUSG00000046516, ENSMUSG00000090124, ENSMUSG00000057666, ENSMUSG00000073422, ENSMUSG00000039431, ENSMUSG00000089960,…	272	1278	7720	1.42134	0.439654	0.0435759	3.02526
mmu04145:Phagosome	15	2.24215	0.00315518	ENSMUSG00000053835, ENSMUSG00000056116, ENSMUSG00000025044, ENSMUSG00000001750, ENSMUSG00000060550, ENSMUSG00000000290, ENSMUSG00000016534, ENSMUSG00000061232, ENSMUSG00000073411, ENSMUSG00000029580, ENSMUSG00000038023, ENSMUSG00000033379, ENSMUSG00000024121, ENSMUSG00000067235, ENSMUSG00000037321	272	174	7720	2.44675	0.537488	0.053588	4.00718
mmu05166:HTLV-I infection	20	2.98954	0.00410852	ENSMUSG00000025225, ENSMUSG00000053835, ENSMUSG00000020471, ENSMUSG00000056116, ENSMUSG00000025860, ENSMUSG00000031537, ENSMUSG00000060550, ENSMUSG00000006728, ENSMUSG00000000290, ENSMUSG00000020888, ENSMUSG00000023206, ENSMUSG00000061232, ENSMUSG00000022812, ENSMUSG00000073411, ENSMUSG00000021250, ENSMUSG00000063889, ENSMUSG00000059552, ENSMUSG00000067235, ENSMUSG00000032462, ENSMUSG00000026072	272	278	7720	2.0419	0.633789	0.0647764	5.18847
mmu03050:Proteasome	7	1.04634	0.00456022	ENSMUSG00000026229, ENSMUSG00000022216, ENSMUSG00000078153, ENSMUSG00000079197, ENSMUSG00000032301, ENSMUSG00000017428, ENSMUSG00000096727	272	45	7720	4.41503	0.672163	0.0673286	5.74347
mmu05200:Pathways in cancer	25	3.73692	0.00637881	ENSMUSG00000040940, ENSMUSG00000025225, ENSMUSG00000030589, ENSMUSG00000026104, ENSMUSG00000020888, ENSMUSG00000036986, ENSMUSG00000031740, ENSMUSG00000027940, ENSMUSG00000026193, ENSMUSG00000022952, ENSMUSG00000008859, ENSMUSG00000059552, ENSMUSG00000032462, ENSMUSG00000036402, ENSMUSG00000038811, ENSMUSG00000025860, ENSMUSG00000026875, ENSMUSG00000063358, ENSMUSG00000006728, ENSMUSG00000031537,…	272	397	7720	1.7873	0.790161	0.0877561	7.94781
mmu04064:NF-kappa B signaling pathway	10	1.49477	0.00681437	ENSMUSG00000056130, ENSMUSG00000025225, ENSMUSG00000026031, ENSMUSG00000025860, ENSMUSG00000026875, ENSMUSG00000031537, ENSMUSG00000021457, ENSMUSG00000032000, ENSMUSG00000026072, ENSMUSG00000089929	272	97	7720	2.92602	0.811451	0.0885228	8.46864
mmu05164:Influenza A	14	2.09268	0.007031	ENSMUSG00000042349, ENSMUSG00000015656, ENSMUSG00000063358, ENSMUSG00000031537, ENSMUSG00000019432, ENSMUSG00000026104, ENSMUSG00000002325, ENSMUSG00000036986, ENSMUSG00000022812, ENSMUSG00000027951, ENSMUSG00000022194, ENSMUSG00000029580, ENSMUSG00000022971, ENSMUSG00000032462	272	171	7720	2.3237	0.821224	0.0866277	8.72667
mmu05203:Viral carcinogenesis	17	2.54111	0.00718831	ENSMUSG00000025225, ENSMUSG00000053835, ENSMUSG00000056116, ENSMUSG00000063358, ENSMUSG00000026875, ENSMUSG00000060550, ENSMUSG00000006728, ENSMUSG00000021457, ENSMUSG00000066036, ENSMUSG00000002325, ENSMUSG00000061232, ENSMUSG00000073411, ENSMUSG00000025358, ENSMUSG00000059552, ENSMUSG00000067235, ENSMUSG00000008855, ENSMUSG00000032462	272	231	7720	2.08874	0.828004	0.0842521	8.91364
mmu05162:Measles	12	1.79372	0.00816405	ENSMUSG00000027951, ENSMUSG00000042349, ENSMUSG00000022971, ENSMUSG00000025358, ENSMUSG00000015656, ENSMUSG00000059552, ENSMUSG00000031207, ENSMUSG00000006728, ENSMUSG00000026104, ENSMUSG00000032462, ENSMUSG00000002325, ENSMUSG00000022812	272	136	7720	2.50433	0.864692	0.0908524	10.0654
mmu05222:Small cell lung cancer	9	1.34529	0.00902493	ENSMUSG00000025860, ENSMUSG00000026193, ENSMUSG00000025358, ENSMUSG00000026875, ENSMUSG00000059552, ENSMUSG00000031537, ENSMUSG00000006728, ENSMUSG00000032000, ENSMUSG00000032462	272	84	7720	3.04097	0.890527	0.0956593	11.0703
Isoform usage, REC day 6 vs REC day 9
No significantly different pathways
Isoform usage, REC day 9 vs REC day 12
No significantly different pathways
Isoform usage, Day 3 RES vs REC
Term	Count	%	PValue	Genes	List Total	Pop Hits	Pop Total	Fold Enrichment	Bonferroni	Benjamini	FDR
mmu00040:Pentose and glucuronate interconversions	10	1.13895	4.00005e-05	ENSMUSG00000090165, ENSMUSG00000001891, ENSMUSG00000089960, ENSMUSG00000089943, ENSMUSG00000090175, ENSMUSG00000054545, ENSMUSG00000090145, ENSMUSG00000090171, ENSMUSG00000090124, ENSMUSG00000061758	376	36	7720	5.70331	0.0105839	0.0105839	0.0524586
mmu00053:Ascorbate and aldarate metabolism	8	0.911162	0.000230059	ENSMUSG00000090165, ENSMUSG00000089960, ENSMUSG00000089943, ENSMUSG00000090175, ENSMUSG00000054545, ENSMUSG00000090145, ENSMUSG00000090171, ENSMUSG00000090124	376	27	7720	6.08353	0.0593676	0.0301379	0.301364
mmu00860:Porphyrin and chlorophyll metabolism	9	1.02506	0.000669746	ENSMUSG00000030871, ENSMUSG00000090165, ENSMUSG00000089960, ENSMUSG00000089943, ENSMUSG00000090175, ENSMUSG00000054545, ENSMUSG00000090145, ENSMUSG00000090171, ENSMUSG00000090124	376	41	7720	4.50701	0.163235	0.057674	0.874995
mmu00983:Drug metabolism - other enzymes	10	1.13895	0.000677577	ENSMUSG00000090165, ENSMUSG00000089960, ENSMUSG00000089943, ENSMUSG00000090175, ENSMUSG00000089917, ENSMUSG00000054545, ENSMUSG00000025574, ENSMUSG00000090145, ENSMUSG00000090171, ENSMUSG00000090124	376	51	7720	4.02587	0.164977	0.0440734	0.885183
Isoform usage, Day 6 RES vs REC
Term	Count	%	PValue	Genes	List Total	Pop Hits	Pop Total	Fold Enrichment	Bonferroni	Benjamini	FDR
mmu00040:Pentose and glucuronate interconversions	9	1.65138	5.0806e-06	ENSMUSG00000090165, ENSMUSG00000089960, ENSMUSG00000089943, ENSMUSG00000028692, ENSMUSG00000090175, ENSMUSG00000054545, ENSMUSG00000090145, ENSMUSG00000090171, ENSMUSG00000090124	217	36	7720	8.89401	0.00112219	0.00112219	0.00647183
mmu00053:Ascorbate and aldarate metabolism	8	1.46789	6.71356e-06	ENSMUSG00000090165, ENSMUSG00000089960, ENSMUSG00000089943, ENSMUSG00000090175, ENSMUSG00000054545, ENSMUSG00000090145, ENSMUSG00000090171, ENSMUSG00000090124	217	27	7720	10.541	0.0014826	0.000741576	0.00855186
mmu00860:Porphyrin and chlorophyll metabolism	9	1.65138	1.42203e-05	ENSMUSG00000090165, ENSMUSG00000089960, ENSMUSG00000003617, ENSMUSG00000089943, ENSMUSG00000090175, ENSMUSG00000054545, ENSMUSG00000090145, ENSMUSG00000090171, ENSMUSG00000090124	217	41	7720	7.80937	0.00313778	0.00104702	0.0181133
mmu00983:Drug metabolism - other enzymes	9	1.65138	7.44983e-05	ENSMUSG00000090165, ENSMUSG00000089960, ENSMUSG00000089943, ENSMUSG00000090175, ENSMUSG00000054545, ENSMUSG00000025574, ENSMUSG00000090145, ENSMUSG00000090171, ENSMUSG00000090124	217	51	7720	6.27812	0.0163299	0.00410772	0.0948596
mmu00140:Steroid hormone biosynthesis	10	1.83486	0.000687057	ENSMUSG00000090165, ENSMUSG00000003271, ENSMUSG00000089960, ENSMUSG00000089943, ENSMUSG00000090175, ENSMUSG00000054545, ENSMUSG00000090145, ENSMUSG00000090171, ENSMUSG00000090124, ENSMUSG00000029233	217	87	7720	4.0892	0.140919	0.0299216	0.871699
mmu00980:Metabolism of xenobiotics by cytochrome P450	8	1.46789	0.00195333	ENSMUSG00000090165, ENSMUSG00000089960, ENSMUSG00000089943, ENSMUSG00000090175, ENSMUSG00000054545, ENSMUSG00000090145, ENSMUSG00000090171, ENSMUSG00000090124	217	64	7720	4.447	0.35086	0.0694857	2.45995
mmu00982:Drug metabolism - cytochrome P450	8	1.46789	0.00233618	ENSMUSG00000090165, ENSMUSG00000089960, ENSMUSG00000089943, ENSMUSG00000090175, ENSMUSG00000054545, ENSMUSG00000090145, ENSMUSG00000090171, ENSMUSG00000090124	217	66	7720	4.31225	0.403633	0.0711823	2.93552
mmu00830:Retinol metabolism	9	1.65138	0.00333113	ENSMUSG00000090165, ENSMUSG00000089960, ENSMUSG00000089943, ENSMUSG00000090175, ENSMUSG00000054545, ENSMUSG00000056666, ENSMUSG00000090145, ENSMUSG00000090171, ENSMUSG00000090124	217	89	7720	3.59758	0.521648	0.0880555	4.16144
Isoform usage, Day 9 RES vs REC
Term	Count	%	PValue	Genes	List Total	Pop Hits	Pop Total	Fold Enrichment	Bonferroni	Benjamini	FDR
mmu04142:Lysosome	10	2.48139	0.00039151	ENSMUSG00000004207, ENSMUSG00000025351, ENSMUSG00000047126, ENSMUSG00000007038, ENSMUSG00000045594, ENSMUSG00000017760, ENSMUSG00000007891, ENSMUSG00000023830, ENSMUSG00000016534, ENSMUSG00000031367	143	122	7720	4.42508	0.077499	0.077499	0.491974
Isoform usage, Day 12 RES vs REC
Term	Count	%	PValue	Genes	List Total	Pop Hits	Pop Total	Fold Enrichment	Bonferroni	Benjamini	FDR
mmu04142:Lysosome	9	3.16901	0.000420333	ENSMUSG00000017760, ENSMUSG00000007891, ENSMUSG00000018774, ENSMUSG00000049624, ENSMUSG00000023143, ENSMUSG00000031266, ENSMUSG00000016534, ENSMUSG00000035847, ENSMUSG00000031367	115	122	7720	4.95225	0.0678023	0.0678023	0.51006
Gene expression, RES day 0 vs RES day 3
Term	Count	%	PValue	Genes	List Total	Pop Hits	Pop Total	Fold Enrichment	Bonferroni	Benjamini	FDR
mmu04380:Osteoclast differentiation	63	1.66008	6.31632e-13	ENSMUSG00000007613, ENSMUSG00000002699, ENSMUSG00000070873, ENSMUSG00000021457, ENSMUSG00000026942, ENSMUSG00000006519, ENSMUSG00000040033, ENSMUSG00000032440, ENSMUSG00000028111, ENSMUSG00000020689, ENSMUSG00000021025, ENSMUSG00000095028, ENSMUSG00000027398, ENSMUSG00000035158, ENSMUSG00000028161, ENSMUSG00000027399, ENSMUSG00000063358, ENSMUSG00000028163, ENSMUSG00000023964, ENSMUSG00000059089,…	1597	126	7720	2.41703	1.81271e-10	1.81271e-10	8.38307e-10
mmu04668:TNF signaling pathway	51	1.34387	2.47779e-09	ENSMUSG00000029380, ENSMUSG00000055994, ENSMUSG00000024778, ENSMUSG00000021367, ENSMUSG00000026942, ENSMUSG00000022221, ENSMUSG00000053175, ENSMUSG00000035042, ENSMUSG00000027962, ENSMUSG00000029379, ENSMUSG00000042406, ENSMUSG00000032487, ENSMUSG00000012519, ENSMUSG00000021025, ENSMUSG00000025076, ENSMUSG00000026070, ENSMUSG00000027398, ENSMUSG00000063358, ENSMUSG00000026875, ENSMUSG00000028163,…	1597	109	7720	2.26181	7.11126e-07	3.55563e-07	3.2887e-06
mmu05162:Measles	59	1.55468	4.09288e-09	ENSMUSG00000042349, ENSMUSG00000003031, ENSMUSG00000026770, ENSMUSG00000032508, ENSMUSG00000024778, ENSMUSG00000052776, ENSMUSG00000020372, ENSMUSG00000037523, ENSMUSG00000091971, ENSMUSG00000040033, ENSMUSG00000023341, ENSMUSG00000021116, ENSMUSG00000021025, ENSMUSG00000024789, ENSMUSG00000027398, ENSMUSG00000020115, ENSMUSG00000027399, ENSMUSG00000028163, ENSMUSG00000004296, ENSMUSG00000006728,…	1597	136	7720	2.09713	1.17465e-06	3.91552e-07	5.43236e-06
mmu01100:Metabolic pathways	342	9.01186	9.42326e-09	ENSMUSG00000034570, ENSMUSG00000062646, ENSMUSG00000037916, ENSMUSG00000038690, ENSMUSG00000050856, ENSMUSG00000058076, ENSMUSG00000025204, ENSMUSG00000025791, ENSMUSG00000003072, ENSMUSG00000064345, ENSMUSG00000016194, ENSMUSG00000039176, ENSMUSG00000090035, ENSMUSG00000061518, ENSMUSG00000006057, ENSMUSG00000064341, ENSMUSG00000017721, ENSMUSG00000039943, ENSMUSG00000022956, ENSMUSG00000047250,…	1597	1278	7720	1.29362	2.70447e-06	6.76118e-07	1.25072e-05
mmu05140:Leishmaniasis	34	0.895916	3.88857e-08	ENSMUSG00000059883, ENSMUSG00000015947, ENSMUSG00000024401, ENSMUSG00000032508, ENSMUSG00000037548, ENSMUSG00000004266, ENSMUSG00000026104, ENSMUSG00000006519, ENSMUSG00000030786, ENSMUSG00000059498, ENSMUSG00000020009, ENSMUSG00000047945, ENSMUSG00000073421, ENSMUSG00000032487, ENSMUSG00000063065, ENSMUSG00000021025, ENSMUSG00000024789, ENSMUSG00000027398, ENSMUSG00000027009, ENSMUSG00000063358,…	1597	64	7720	2.5681	1.11601e-05	2.23203e-06	5.16118e-05
mmu05164:Influenza A	67	1.76548	4.35449e-08	ENSMUSG00000000441, ENSMUSG00000042349, ENSMUSG00000032508, ENSMUSG00000024778, ENSMUSG00000052776, ENSMUSG00000022504, ENSMUSG00000037523, ENSMUSG00000091971, ENSMUSG00000040033, ENSMUSG00000035042, ENSMUSG00000073421, ENSMUSG00000021116, ENSMUSG00000023341, ENSMUSG00000021025, ENSMUSG00000024789, ENSMUSG00000020115, ENSMUSG00000020641, ENSMUSG00000027398, ENSMUSG00000027399, ENSMUSG00000063358,…	1597	171	7720	1.89405	1.24973e-05	2.0829e-06	5.77959e-05
mmu05168:Herpes simplex infection	77	2.02899	6.4893e-08	ENSMUSG00000042349, ENSMUSG00000032508, ENSMUSG00000024778, ENSMUSG00000052776, ENSMUSG00000016283, ENSMUSG00000026942, ENSMUSG00000037523, ENSMUSG00000040681, ENSMUSG00000043733, ENSMUSG00000040033, ENSMUSG00000029238, ENSMUSG00000035042, ENSMUSG00000026222, ENSMUSG00000073421, ENSMUSG00000021116, ENSMUSG00000021025, ENSMUSG00000056116, ENSMUSG00000024789, ENSMUSG00000020115, ENSMUSG00000027398,…	1597	208	7720	1.78953	1.86241e-05	2.66061e-06	8.61306e-05
mmu05134:Legionellosis	31	0.816864	8.86095e-08	ENSMUSG00000029380, ENSMUSG00000025225, ENSMUSG00000037742, ENSMUSG00000024401, ENSMUSG00000032508, ENSMUSG00000079164, ENSMUSG00000021640, ENSMUSG00000009112, ENSMUSG00000091971, ENSMUSG00000030786, ENSMUSG00000051439, ENSMUSG00000029379, ENSMUSG00000039217, ENSMUSG00000030793, ENSMUSG00000021025, ENSMUSG00000025076, ENSMUSG00000027398, ENSMUSG00000028914, ENSMUSG00000028163, ENSMUSG00000027995,…	1597	57	7720	2.62905	2.54306e-05	3.17886e-06	0.000117609
mmu05166:HTLV-I infection	93	2.45059	5.75913e-07	ENSMUSG00000007613, ENSMUSG00000030830, ENSMUSG00000020471, ENSMUSG00000029430, ENSMUSG00000026770, ENSMUSG00000000708, ENSMUSG00000038387, ENSMUSG00000029472, ENSMUSG00000016283, ENSMUSG00000055723, ENSMUSG00000022220, ENSMUSG00000032440, ENSMUSG00000032402, ENSMUSG00000028645, ENSMUSG00000027962, ENSMUSG00000017861, ENSMUSG00000006398, ENSMUSG00000032409, ENSMUSG00000073421, ENSMUSG00000042406,…	1597	278	7720	1.61715	0.000165273	1.83651e-05	0.000764391
mmu04060:Cytokine-cytokine receptor interaction	84	2.21344	7.01105e-07	ENSMUSG00000025929, ENSMUSG00000007613, ENSMUSG00000048480, ENSMUSG00000026770, ENSMUSG00000018341, ENSMUSG00000024778, ENSMUSG00000003882, ENSMUSG00000028019, ENSMUSG00000035678, ENSMUSG00000032440, ENSMUSG00000035373, ENSMUSG00000035042, ENSMUSG00000000982, ENSMUSG00000050395, ENSMUSG00000029648, ENSMUSG00000079227, ENSMUSG00000000791, ENSMUSG00000029373, ENSMUSG00000049093, ENSMUSG00000024399,…	1597	245	7720	1.65739	0.000201197	2.01215e-05	0.000930553
mmu05321:Inflammatory bowel disease (IBD)	30	0.790514	9.58949e-07	ENSMUSG00000025929, ENSMUSG00000024401, ENSMUSG00000055994, ENSMUSG00000018341, ENSMUSG00000079164, ENSMUSG00000037548, ENSMUSG00000026104, ENSMUSG00000032402, ENSMUSG00000032238, ENSMUSG00000020009, ENSMUSG00000000791, ENSMUSG00000073421, ENSMUSG00000049093, ENSMUSG00000039217, ENSMUSG00000027398, ENSMUSG00000026070, ENSMUSG00000030748, ENSMUSG00000055435, ENSMUSG00000074695, ENSMUSG00000027399,…	1597	59	7720	2.458	0.000275181	2.50196e-05	0.00127278
mmu04062:Chemokine signaling pathway	70	1.84453	1.29139e-06	ENSMUSG00000000441, ENSMUSG00000029380, ENSMUSG00000048480, ENSMUSG00000031780, ENSMUSG00000003228, ENSMUSG00000022220, ENSMUSG00000009621, ENSMUSG00000039943, ENSMUSG00000040033, ENSMUSG00000035373, ENSMUSG00000041112, ENSMUSG00000035042, ENSMUSG00000029379, ENSMUSG00000000982, ENSMUSG00000079227, ENSMUSG00000029373, ENSMUSG00000005580, ENSMUSG00000021025, ENSMUSG00000036402, ENSMUSG00000060216,…	1597	196	7720	1.72645	0.00037056	3.08853e-05	0.00171401
mmu04640:Hematopoietic cell lineage	37	0.974967	3.14821e-06	ENSMUSG00000015947, ENSMUSG00000026770, ENSMUSG00000024401, ENSMUSG00000006235, ENSMUSG00000027947, ENSMUSG00000028076, ENSMUSG00000042284, ENSMUSG00000003882, ENSMUSG00000005672, ENSMUSG00000027863, ENSMUSG00000030786, ENSMUSG00000014599, ENSMUSG00000047139, ENSMUSG00000051439, ENSMUSG00000004609, ENSMUSG00000038067, ENSMUSG00000026073, ENSMUSG00000040329, ENSMUSG00000005087, ENSMUSG00000026072,…	1597	84	7720	2.12929	0.000903129	6.95005e-05	0.00417845
mmu05161:Hepatitis B	55	1.44928	3.41765e-06	ENSMUSG00000000441, ENSMUSG00000007613, ENSMUSG00000042349, ENSMUSG00000003031, ENSMUSG00000033730, ENSMUSG00000032508, ENSMUSG00000024778, ENSMUSG00000037523, ENSMUSG00000040033, ENSMUSG00000002109, ENSMUSG00000042406, ENSMUSG00000013663, ENSMUSG00000024959, ENSMUSG00000021025, ENSMUSG00000030265, ENSMUSG00000020115, ENSMUSG00000063358, ENSMUSG00000028163, ENSMUSG00000006728, ENSMUSG00000027646,…	1597	146	7720	1.82105	0.000980386	7.00595e-05	0.00453606
mmu04621:NOD-like receptor signaling pathway	28	0.737813	3.63648e-06	ENSMUSG00000021709, ENSMUSG00000024401, ENSMUSG00000055994, ENSMUSG00000019850, ENSMUSG00000021640, ENSMUSG00000035042, ENSMUSG00000069830, ENSMUSG00000032322, ENSMUSG00000063065, ENSMUSG00000039217, ENSMUSG00000030793, ENSMUSG00000021025, ENSMUSG00000070390, ENSMUSG00000027398, ENSMUSG00000022534, ENSMUSG00000063358, ENSMUSG00000028163, ENSMUSG00000030595, ENSMUSG00000031537, ENSMUSG00000032691,…	1597	56	7720	2.41703	0.00104313	6.95757e-05	0.00482649
mmu04620:Toll-like receptor signaling pathway	41	1.08037	9.59782e-06	ENSMUSG00000042349, ENSMUSG00000018930, ENSMUSG00000059883, ENSMUSG00000032508, ENSMUSG00000024401, ENSMUSG00000029417, ENSMUSG00000079164, ENSMUSG00000026104, ENSMUSG00000022971, ENSMUSG00000028111, ENSMUSG00000035042, ENSMUSG00000051439, ENSMUSG00000000982, ENSMUSG00000032462, ENSMUSG00000063065, ENSMUSG00000029304, ENSMUSG00000021025, ENSMUSG00000060183, ENSMUSG00000027398, ENSMUSG00000020115,…	1597	101	7720	1.96234	0.0027508	0.000172147	0.0127382
mmu05145:Toxoplasmosis	44	1.15942	1.4786e-05	ENSMUSG00000059883, ENSMUSG00000046879, ENSMUSG00000032508, ENSMUSG00000024401, ENSMUSG00000037548, ENSMUSG00000025701, ENSMUSG00000026104, ENSMUSG00000022504, ENSMUSG00000091971, ENSMUSG00000051969, ENSMUSG00000020009, ENSMUSG00000079227, ENSMUSG00000021868, ENSMUSG00000073421, ENSMUSG00000026478, ENSMUSG00000032462, ENSMUSG00000063065, ENSMUSG00000027111, ENSMUSG00000024959, ENSMUSG00000021025,…	1597	113	7720	1.88229	0.00423463	0.000249594	0.0196233
mmu05152:Tuberculosis	61	1.60738	1.9617e-05	ENSMUSG00000000441, ENSMUSG00000055994, ENSMUSG00000032508, ENSMUSG00000021457, ENSMUSG00000016534, ENSMUSG00000022504, ENSMUSG00000018819, ENSMUSG00000030786, ENSMUSG00000036438, ENSMUSG00000030789, ENSMUSG00000021820, ENSMUSG00000032688, ENSMUSG00000073421, ENSMUSG00000060477, ENSMUSG00000018334, ENSMUSG00000024959, ENSMUSG00000024789, ENSMUSG00000027398, ENSMUSG00000061878, ENSMUSG00000028161,…	1597	176	7720	1.67544	0.00561432	0.000312737	0.026034
mmu04662:B cell receptor signaling pathway	31	0.816864	2.05988e-05	ENSMUSG00000000441, ENSMUSG00000026656, ENSMUSG00000021457, ENSMUSG00000004266, ENSMUSG00000009621, ENSMUSG00000061132, ENSMUSG00000031902, ENSMUSG00000032688, ENSMUSG00000032462, ENSMUSG00000063065, ENSMUSG00000021025, ENSMUSG00000034116, ENSMUSG00000030265, ENSMUSG00000028161, ENSMUSG00000030577, ENSMUSG00000063358, ENSMUSG00000039936, ENSMUSG00000019699, ENSMUSG00000041417, ENSMUSG00000023947,…	1597	70	7720	2.1408	0.00589449	0.000311106	0.0273368
mmu04064:NF-kappa B signaling pathway	39	1.02767	2.13564e-05	ENSMUSG00000025225, ENSMUSG00000030172, ENSMUSG00000018930, ENSMUSG00000059883, ENSMUSG00000040296, ENSMUSG00000024401, ENSMUSG00000032508, ENSMUSG00000019850, ENSMUSG00000021457, ENSMUSG00000002983, ENSMUSG00000026942, ENSMUSG00000061132, ENSMUSG00000026031, ENSMUSG00000021822, ENSMUSG00000027962, ENSMUSG00000051439, ENSMUSG00000032688, ENSMUSG00000030339, ENSMUSG00000026072, ENSMUSG00000032487,…	1597	97	7720	1.94359	0.00611062	0.000306421	0.0283421
mmu05133:Pertussis	32	0.843215	2.60354e-05	ENSMUSG00000036887, ENSMUSG00000059883, ENSMUSG00000024401, ENSMUSG00000032508, ENSMUSG00000030786, ENSMUSG00000036438, ENSMUSG00000051439, ENSMUSG00000023224, ENSMUSG00000063065, ENSMUSG00000030793, ENSMUSG00000024371, ENSMUSG00000025076, ENSMUSG00000027398, ENSMUSG00000000001, ENSMUSG00000063358, ENSMUSG00000027399, ENSMUSG00000036905, ENSMUSG00000028163, ENSMUSG00000004296, ENSMUSG00000000555,…	1597	74	7720	2.09041	0.0074444	0.000355758	0.0345505
mmu04650:Natural killer cell mediated cytotoxicity	41	1.08037	2.82528e-05	ENSMUSG00000000441, ENSMUSG00000030830, ENSMUSG00000002699, ENSMUSG00000024401, ENSMUSG00000024778, ENSMUSG00000078452, ENSMUSG00000021457, ENSMUSG00000004266, ENSMUSG00000009621, ENSMUSG00000043733, ENSMUSG00000050965, ENSMUSG00000022971, ENSMUSG00000015355, ENSMUSG00000020009, ENSMUSG00000059456, ENSMUSG00000032462, ENSMUSG00000063065, ENSMUSG00000004709, ENSMUSG00000053219, ENSMUSG00000004446,…	1597	105	7720	1.88759	0.00807588	0.000368508	0.0374926
mmu05012:Parkinson's disease	53	1.39657	3.38571e-05	ENSMUSG00000037916, ENSMUSG00000005510, ENSMUSG00000009863, ENSMUSG00000036273, ENSMUSG00000058076, ENSMUSG00000025204, ENSMUSG00000003072, ENSMUSG00000020178, ENSMUSG00000018770, ENSMUSG00000064345, ENSMUSG00000061518, ENSMUSG00000006057, ENSMUSG00000064341, ENSMUSG00000000171, ENSMUSG00000022956, ENSMUSG00000021764, ENSMUSG00000059534, ENSMUSG00000021868, ENSMUSG00000025651, ENSMUSG00000030884,…	1597	149	7720	1.7195	0.00967008	0.000422395	0.0449282
mmu04110:Cell cycle	46	1.21212	3.80277e-05	ENSMUSG00000026842, ENSMUSG00000003031, ENSMUSG00000029472, ENSMUSG00000019942, ENSMUSG00000038482, ENSMUSG00000036390, ENSMUSG00000021453, ENSMUSG00000022105, ENSMUSG00000031666, ENSMUSG00000032402, ENSMUSG00000031016, ENSMUSG00000032218, ENSMUSG00000028587, ENSMUSG00000022521, ENSMUSG00000027330, ENSMUSG00000006398, ENSMUSG00000032409, ENSMUSG00000030867, ENSMUSG00000033102, ENSMUSG00000002870,…	1597	124	7720	1.79328	0.0108548	0.000454653	0.0504613
mmu05142:Chagas disease (American trypanosomiasis)	40	1.05402	4.16014e-05	ENSMUSG00000007613, ENSMUSG00000036887, ENSMUSG00000059883, ENSMUSG00000032508, ENSMUSG00000024401, ENSMUSG00000024778, ENSMUSG00000003814, ENSMUSG00000007564, ENSMUSG00000039943, ENSMUSG00000026031, ENSMUSG00000032440, ENSMUSG00000032402, ENSMUSG00000035042, ENSMUSG00000000982, ENSMUSG00000020009, ENSMUSG00000032462, ENSMUSG00000063065, ENSMUSG00000021025, ENSMUSG00000027398, ENSMUSG00000030341,…	1597	103	7720	1.87731	0.0118689	0.00047748	0.0552023
mmu05010:Alzheimer's disease	60	1.58103	4.84493e-05	ENSMUSG00000056999, ENSMUSG00000037916, ENSMUSG00000005510, ENSMUSG00000009863, ENSMUSG00000025204, ENSMUSG00000024778, ENSMUSG00000058076, ENSMUSG00000003072, ENSMUSG00000015968, ENSMUSG00000018770, ENSMUSG00000061518, ENSMUSG00000006057, ENSMUSG00000039943, ENSMUSG00000000171, ENSMUSG00000022956, ENSMUSG00000036438, ENSMUSG00000021764, ENSMUSG00000059534, ENSMUSG00000025651, ENSMUSG00000030884,…	1597	177	7720	1.63867	0.0138091	0.000534676	0.0642863
mmu04145:Phagosome	59	1.55468	5.59996e-05	ENSMUSG00000016283, ENSMUSG00000016534, ENSMUSG00000026390, ENSMUSG00000006519, ENSMUSG00000030786, ENSMUSG00000030082, ENSMUSG00000073421, ENSMUSG00000043091, ENSMUSG00000020689, ENSMUSG00000001525, ENSMUSG00000056116, ENSMUSG00000002944, ENSMUSG00000007458, ENSMUSG00000035770, ENSMUSG00000029125, ENSMUSG00000059089, ENSMUSG00000030707, ENSMUSG00000001473, ENSMUSG00000053317, ENSMUSG00000016206,…	1597	174	7720	1.63914	0.0159439	0.000595095	0.0743012
mmu04068:FoxO signaling pathway	48	1.26482	6.91458e-05	ENSMUSG00000000441, ENSMUSG00000007613, ENSMUSG00000027381, ENSMUSG00000022433, ENSMUSG00000003031, ENSMUSG00000020053, ENSMUSG00000047182, ENSMUSG00000003882, ENSMUSG00000037111, ENSMUSG00000025422, ENSMUSG00000036390, ENSMUSG00000005533, ENSMUSG00000021453, ENSMUSG00000055148, ENSMUSG00000031666, ENSMUSG00000032440, ENSMUSG00000032402, ENSMUSG00000032218, ENSMUSG00000022521, ENSMUSG00000025758,…	1597	134	7720	1.7316	0.0196499	0.000708518	0.0917363
mmu04141:Protein processing in endoplasmic reticulum	57	1.50198	7.48149e-05	ENSMUSG00000029616, ENSMUSG00000025823, ENSMUSG00000030298, ENSMUSG00000026942, ENSMUSG00000039234, ENSMUSG00000091971, ENSMUSG00000071650, ENSMUSG00000027828, ENSMUSG00000030082, ENSMUSG00000019927, ENSMUSG00000020571, ENSMUSG00000003746, ENSMUSG00000030062, ENSMUSG00000032116, ENSMUSG00000042406, ENSMUSG00000032115, ENSMUSG00000020986, ENSMUSG00000021116, ENSMUSG00000039474, ENSMUSG00000035325,…	1597	168	7720	1.64013	0.0212438	0.000740163	0.0992542
mmu04932:Non-alcoholic fatty liver disease (NAFLD)	54	1.42292	7.93821e-05	ENSMUSG00000037916, ENSMUSG00000005510, ENSMUSG00000009863, ENSMUSG00000027381, ENSMUSG00000058076, ENSMUSG00000025204, ENSMUSG00000024778, ENSMUSG00000061518, ENSMUSG00000026942, ENSMUSG00000000171, ENSMUSG00000021764, ENSMUSG00000059534, ENSMUSG00000025651, ENSMUSG00000030884, ENSMUSG00000042406, ENSMUSG00000002108, ENSMUSG00000021116, ENSMUSG00000025076, ENSMUSG00000026260, ENSMUSG00000027398,…	1597	157	7720	1.66267	0.022526	0.000759164	0.10531
mmu05215:Prostate cancer	35	0.922266	7.9449e-05	ENSMUSG00000000441, ENSMUSG00000003031, ENSMUSG00000020053, ENSMUSG00000005533, ENSMUSG00000028019, ENSMUSG00000022105, ENSMUSG00000027230, ENSMUSG00000022521, ENSMUSG00000062312, ENSMUSG00000042406, ENSMUSG00000024985, ENSMUSG00000032462, ENSMUSG00000013663, ENSMUSG00000063065, ENSMUSG00000024959, ENSMUSG00000025958, ENSMUSG00000006932, ENSMUSG00000021025, ENSMUSG00000028914, ENSMUSG00000030265,…	1597	88	7720	1.92264	0.0225448	0.000735303	0.105399
mmu04630:Jak-STAT signaling pathway	50	1.31752	0.000141624	ENSMUSG00000026770, ENSMUSG00000018341, ENSMUSG00000004266, ENSMUSG00000003882, ENSMUSG00000043733, ENSMUSG00000040033, ENSMUSG00000024014, ENSMUSG00000000791, ENSMUSG00000049093, ENSMUSG00000024789, ENSMUSG00000030748, ENSMUSG00000074695, ENSMUSG00000004296, ENSMUSG00000055737, ENSMUSG00000044244, ENSMUSG00000022967, ENSMUSG00000059326, ENSMUSG00000038037, ENSMUSG00000000184, ENSMUSG00000025746,…	1597	145	7720	1.66692	0.0398339	0.00126947	0.18781
mmu04115:p53 signaling pathway	28	0.737813	0.000186794	ENSMUSG00000025647, ENSMUSG00000027215, ENSMUSG00000004446, ENSMUSG00000026389, ENSMUSG00000054387, ENSMUSG00000028914, ENSMUSG00000024778, ENSMUSG00000020053, ENSMUSG00000040152, ENSMUSG00000019942, ENSMUSG00000006728, ENSMUSG00000020184, ENSMUSG00000022292, ENSMUSG00000028893, ENSMUSG00000036390, ENSMUSG00000022385, ENSMUSG00000021453, ENSMUSG00000000184, ENSMUSG00000032218, ENSMUSG00000041431,…	1597	67	7720	2.02021	0.0522031	0.00162338	0.247643
mmu03030:DNA replication	18	0.474308	0.000208395	ENSMUSG00000038644, ENSMUSG00000007080, ENSMUSG00000020471, ENSMUSG00000002870, ENSMUSG00000028884, ENSMUSG00000022881, ENSMUSG00000024742, ENSMUSG00000056394, ENSMUSG00000026134, ENSMUSG00000023104, ENSMUSG00000005410, ENSMUSG00000022673, ENSMUSG00000026355, ENSMUSG00000041859, ENSMUSG00000028394, ENSMUSG00000024833, ENSMUSG00000029191, ENSMUSG00000029363	1597	35	7720	2.48609	0.0580618	0.00175774	0.276244
mmu04010:MAPK signaling pathway	77	2.02899	0.000219921	ENSMUSG00000000441, ENSMUSG00000027347, ENSMUSG00000007613, ENSMUSG00000031506, ENSMUSG00000024778, ENSMUSG00000034765, ENSMUSG00000015968, ENSMUSG00000038387, ENSMUSG00000030589, ENSMUSG00000042826, ENSMUSG00000055723, ENSMUSG00000026942, ENSMUSG00000091971, ENSMUSG00000021453, ENSMUSG00000032440, ENSMUSG00000037337, ENSMUSG00000017291, ENSMUSG00000042406, ENSMUSG00000031142, ENSMUSG00000036402,…	1597	253	7720	1.47124	0.0611733	0.00180193	0.291502
mmu05144:Malaria	22	0.57971	0.000249395	ENSMUSG00000030830, ENSMUSG00000002944, ENSMUSG00000027398, ENSMUSG00000024401, ENSMUSG00000032508, ENSMUSG00000028047, ENSMUSG00000040152, ENSMUSG00000028864, ENSMUSG00000037405, ENSMUSG00000021702, ENSMUSG00000027995, ENSMUSG00000009376, ENSMUSG00000017652, ENSMUSG00000045322, ENSMUSG00000025746, ENSMUSG00000027962, ENSMUSG00000038067, ENSMUSG00000020592, ENSMUSG00000090523, ENSMUSG00000035385,…	1597	48	7720	2.21561	0.0690831	0.0019865	0.330509
mmu05212:Pancreatic cancer	27	0.711462	0.000281391	ENSMUSG00000000441, ENSMUSG00000031133, ENSMUSG00000007613, ENSMUSG00000026821, ENSMUSG00000026104, ENSMUSG00000023951, ENSMUSG00000022105, ENSMUSG00000032440, ENSMUSG00000032402, ENSMUSG00000062312, ENSMUSG00000008859, ENSMUSG00000032462, ENSMUSG00000063065, ENSMUSG00000024959, ENSMUSG00000030265, ENSMUSG00000028914, ENSMUSG00000063358, ENSMUSG00000039936, ENSMUSG00000019699, ENSMUSG00000041417,…	1597	65	7720	2.008	0.0775946	0.00218061	0.372838
mmu04660:T cell receptor signaling pathway	38	1.00132	0.000287194	ENSMUSG00000000441, ENSMUSG00000027347, ENSMUSG00000002699, ENSMUSG00000024401, ENSMUSG00000026395, ENSMUSG00000004266, ENSMUSG00000009621, ENSMUSG00000031902, ENSMUSG00000029217, ENSMUSG00000032688, ENSMUSG00000032462, ENSMUSG00000063065, ENSMUSG00000021025, ENSMUSG00000034116, ENSMUSG00000030265, ENSMUSG00000022637, ENSMUSG00000028161, ENSMUSG00000019843, ENSMUSG00000039936, ENSMUSG00000019699,…	1597	104	7720	1.76629	0.07913	0.00216703	0.380513
mmu05203:Viral carcinogenesis	71	1.87088	0.000290698	ENSMUSG00000001424, ENSMUSG00000003031, ENSMUSG00000033730, ENSMUSG00000000708, ENSMUSG00000021457, ENSMUSG00000016283, ENSMUSG00000026942, ENSMUSG00000018102, ENSMUSG00000026222, ENSMUSG00000079227, ENSMUSG00000006398, ENSMUSG00000042406, ENSMUSG00000024959, ENSMUSG00000021025, ENSMUSG00000056116, ENSMUSG00000030265, ENSMUSG00000063358, ENSMUSG00000026875, ENSMUSG00000028163, ENSMUSG00000006728,…	1597	231	7720	1.48579	0.080056	0.00213726	0.385148
mmu05200:Pathways in cancer	111	2.9249	0.000358463	ENSMUSG00000031502, ENSMUSG00000026842, ENSMUSG00000031503, ENSMUSG00000021109, ENSMUSG00000024778, ENSMUSG00000042826, ENSMUSG00000026942, ENSMUSG00000039943, ENSMUSG00000035105, ENSMUSG00000032440, ENSMUSG00000028645, ENSMUSG00000039942, ENSMUSG00000026193, ENSMUSG00000026430, ENSMUSG00000040760, ENSMUSG00000027111, ENSMUSG00000024959, ENSMUSG00000030265, ENSMUSG00000022637, ENSMUSG00000000001,…	1597	397	7720	1.35159	0.0977803	0.00256913	0.474732
mmu01130:Biosynthesis of antibiotics	66	1.73913	0.000440316	ENSMUSG00000009863, ENSMUSG00000023456, ENSMUSG00000058076, ENSMUSG00000025791, ENSMUSG00000025403, ENSMUSG00000000171, ENSMUSG00000053604, ENSMUSG00000005683, ENSMUSG00000031604, ENSMUSG00000027452, ENSMUSG00000021125, ENSMUSG00000059040, ENSMUSG00000011752, ENSMUSG00000032478, ENSMUSG00000034424, ENSMUSG00000000628, ENSMUSG00000053398, ENSMUSG00000032263, ENSMUSG00000027605, ENSMUSG00000022962,…	1597	214	7720	1.49088	0.118737	0.00307815	0.582843
mmu04210:Apoptosis	25	0.658762	0.000477276	ENSMUSG00000024401, ENSMUSG00000024778, ENSMUSG00000026942, ENSMUSG00000026031, ENSMUSG00000032462, ENSMUSG00000068758, ENSMUSG00000024959, ENSMUSG00000021025, ENSMUSG00000004446, ENSMUSG00000025076, ENSMUSG00000030341, ENSMUSG00000028914, ENSMUSG00000071714, ENSMUSG00000039936, ENSMUSG00000019699, ENSMUSG00000041417, ENSMUSG00000028163, ENSMUSG00000031537, ENSMUSG00000071713, ENSMUSG00000027997,…	1597	60	7720	2.01419	0.128039	0.00325685	0.631623
mmu04370:VEGF signaling pathway	25	0.658762	0.000477276	ENSMUSG00000000441, ENSMUSG00000024959, ENSMUSG00000030265, ENSMUSG00000028914, ENSMUSG00000061878, ENSMUSG00000028161, ENSMUSG00000063358, ENSMUSG00000019699, ENSMUSG00000039936, ENSMUSG00000041417, ENSMUSG00000078816, ENSMUSG00000027646, ENSMUSG00000033220, ENSMUSG00000023951, ENSMUSG00000050965, ENSMUSG00000062960, ENSMUSG00000016528, ENSMUSG00000021816, ENSMUSG00000025499, ENSMUSG00000056220,…	1597	60	7720	2.01419	0.128039	0.00325685	0.631623
mmu05150:Staphylococcus aureus infection	22	0.57971	0.00049086	ENSMUSG00000036887, ENSMUSG00000024371, ENSMUSG00000030830, ENSMUSG00000015947, ENSMUSG00000056529, ENSMUSG00000026656, ENSMUSG00000040552, ENSMUSG00000036905, ENSMUSG00000037405, ENSMUSG00000059089, ENSMUSG00000037548, ENSMUSG00000024334, ENSMUSG00000030786, ENSMUSG00000048163, ENSMUSG00000090231, ENSMUSG00000055172, ENSMUSG00000059498, ENSMUSG00000052270, ENSMUSG00000038521, ENSMUSG00000073418,…	1597	50	7720	2.12699	0.131434	0.00327164	0.649545
mmu05205:Proteoglycans in cancer	63	1.66008	0.000503652	ENSMUSG00000000441, ENSMUSG00000020170, ENSMUSG00000021109, ENSMUSG00000024778, ENSMUSG00000038387, ENSMUSG00000004266, ENSMUSG00000055723, ENSMUSG00000031740, ENSMUSG00000043733, ENSMUSG00000021822, ENSMUSG00000021820, ENSMUSG00000026193, ENSMUSG00000020689, ENSMUSG00000017009, ENSMUSG00000006932, ENSMUSG00000030265, ENSMUSG00000030536, ENSMUSG00000022637, ENSMUSG00000022831, ENSMUSG00000063358,…	1597	203	7720	1.50023	0.134618	0.00328062	0.66642
mmu04510:Focal adhesion	64	1.68643	0.00050521	ENSMUSG00000000441, ENSMUSG00000031502, ENSMUSG00000031503, ENSMUSG00000042284, ENSMUSG00000034868, ENSMUSG00000009621, ENSMUSG00000028019, ENSMUSG00000021823, ENSMUSG00000039844, ENSMUSG00000026193, ENSMUSG00000029648, ENSMUSG00000026478, ENSMUSG00000027111, ENSMUSG00000013663, ENSMUSG00000020689, ENSMUSG00000024959, ENSMUSG00000006932, ENSMUSG00000063358, ENSMUSG00000027009, ENSMUSG00000021448,…	1597	207	7720	1.49459	0.135005	0.00321775	0.668477
mmu04066:HIF-1 signaling pathway	37	0.974967	0.000626802	ENSMUSG00000025877, ENSMUSG00000003031, ENSMUSG00000021109, ENSMUSG00000020053, ENSMUSG00000027947, ENSMUSG00000026773, ENSMUSG00000028156, ENSMUSG00000021367, ENSMUSG00000024617, ENSMUSG00000005533, ENSMUSG00000055839, ENSMUSG00000023951, ENSMUSG00000035105, ENSMUSG00000050965, ENSMUSG00000028645, ENSMUSG00000022521, ENSMUSG00000021820, ENSMUSG00000062312, ENSMUSG00000020009, ENSMUSG00000029648,…	1597	104	7720	1.71981	0.164687	0.00390429	0.828745
mmu05220:Chronic myeloid leukemia	28	0.737813	0.00072805	ENSMUSG00000000441, ENSMUSG00000009681, ENSMUSG00000007613, ENSMUSG00000026842, ENSMUSG00000003031, ENSMUSG00000043733, ENSMUSG00000022105, ENSMUSG00000032440, ENSMUSG00000032462, ENSMUSG00000063065, ENSMUSG00000024959, ENSMUSG00000021025, ENSMUSG00000030265, ENSMUSG00000022637, ENSMUSG00000039936, ENSMUSG00000019699, ENSMUSG00000063358, ENSMUSG00000041417, ENSMUSG00000028163, ENSMUSG00000031537,…	1597	72	7720	1.87991	0.188626	0.0044375	0.962015
mmu05160:Hepatitis C	45	1.18577	0.000869749	ENSMUSG00000000441, ENSMUSG00000032661, ENSMUSG00000042349, ENSMUSG00000040296, ENSMUSG00000024401, ENSMUSG00000052776, ENSMUSG00000026104, ENSMUSG00000002325, ENSMUSG00000026942, ENSMUSG00000037523, ENSMUSG00000007564, ENSMUSG00000040033, ENSMUSG00000015846, ENSMUSG00000022971, ENSMUSG00000053113, ENSMUSG00000034459, ENSMUSG00000032462, ENSMUSG00000002108, ENSMUSG00000055976, ENSMUSG00000063065,…	1597	136	7720	1.59951	0.220986	0.00518913	1.14825
mmu04666:Fc gamma R-mediated phagocytosis	31	0.816864	0.000971203	ENSMUSG00000000441, ENSMUSG00000024381, ENSMUSG00000015947, ENSMUSG00000026656, ENSMUSG00000026395, ENSMUSG00000028517, ENSMUSG00000021457, ENSMUSG00000009621, ENSMUSG00000050965, ENSMUSG00000021948, ENSMUSG00000047945, ENSMUSG00000020143, ENSMUSG00000052151, ENSMUSG00000032462, ENSMUSG00000069662, ENSMUSG00000063065, ENSMUSG00000021759, ENSMUSG00000034116, ENSMUSG00000061878, ENSMUSG00000063358,…	1597	84	7720	1.784	0.243362	0.00567507	1.2814
mmu05221:Acute myeloid leukemia	23	0.606061	0.00107945	ENSMUSG00000000441, ENSMUSG00000024959, ENSMUSG00000030265, ENSMUSG00000063358, ENSMUSG00000039936, ENSMUSG00000019699, ENSMUSG00000028163, ENSMUSG00000041417, ENSMUSG00000031537, ENSMUSG00000036986, ENSMUSG00000034957, ENSMUSG00000005672, ENSMUSG00000066687, ENSMUSG00000037992, ENSMUSG00000024014, ENSMUSG00000002250, ENSMUSG00000025499, ENSMUSG00000001552, ENSMUSG00000004221, ENSMUSG00000024985,…	1597	56	7720	1.98542	0.266531	0.00618022	1.42327
mmu04722:Neurotrophin signaling pathway	41	1.08037	0.00109883	ENSMUSG00000000441, ENSMUSG00000026842, ENSMUSG00000052681, ENSMUSG00000020227, ENSMUSG00000020170, ENSMUSG00000059883, ENSMUSG00000036333, ENSMUSG00000024617, ENSMUSG00000071369, ENSMUSG00000043733, ENSMUSG00000039844, ENSMUSG00000036438, ENSMUSG00000038128, ENSMUSG00000021820, ENSMUSG00000021948, ENSMUSG00000021180, ENSMUSG00000042406, ENSMUSG00000060477, ENSMUSG00000032462, ENSMUSG00000063065,…	1597	122	7720	1.62456	0.270603	0.00616789	1.44865
mmu04151:PI3K-Akt signaling pathway	97	2.55599	0.00132548	ENSMUSG00000000441, ENSMUSG00000027381, ENSMUSG00000031502, ENSMUSG00000003031, ENSMUSG00000031503, ENSMUSG00000026770, ENSMUSG00000042826, ENSMUSG00000042284, ENSMUSG00000021457, ENSMUSG00000028156, ENSMUSG00000003882, ENSMUSG00000017146, ENSMUSG00000028019, ENSMUSG00000026193, ENSMUSG00000029648, ENSMUSG00000026478, ENSMUSG00000042406, ENSMUSG00000027111, ENSMUSG00000013663, ENSMUSG00000020689,…	1597	351	7720	1.33591	0.316593	0.00729373	1.74503
mmu05230:Central carbon metabolism in cancer	25	0.658762	0.00140843	ENSMUSG00000000441, ENSMUSG00000025877, ENSMUSG00000011752, ENSMUSG00000030265, ENSMUSG00000000628, ENSMUSG00000021109, ENSMUSG00000063358, ENSMUSG00000039936, ENSMUSG00000019699, ENSMUSG00000041417, ENSMUSG00000026103, ENSMUSG00000009376, ENSMUSG00000005672, ENSMUSG00000020277, ENSMUSG00000024620, ENSMUSG00000028645, ENSMUSG00000025161, ENSMUSG00000062312, ENSMUSG00000025499, ENSMUSG00000001918,…	1597	64	7720	1.88831	0.332693	0.00760312	1.8533
mmu04623:Cytosolic DNA-sensing pathway	25	0.658762	0.00140843	ENSMUSG00000030793, ENSMUSG00000042349, ENSMUSG00000022476, ENSMUSG00000021025, ENSMUSG00000035834, ENSMUSG00000018930, ENSMUSG00000027514, ENSMUSG00000040296, ENSMUSG00000020115, ENSMUSG00000027398, ENSMUSG00000028163, ENSMUSG00000030595, ENSMUSG00000031537, ENSMUSG00000024349, ENSMUSG00000037523, ENSMUSG00000022221, ENSMUSG00000034855, ENSMUSG00000027951, ENSMUSG00000025746, ENSMUSG00000035042,…	1597	64	7720	1.88831	0.332693	0.00760312	1.8533
mmu04622:RIG-I-like receptor signaling pathway	26	0.685112	0.00156729	ENSMUSG00000042349, ENSMUSG00000031154, ENSMUSG00000040296, ENSMUSG00000024401, ENSMUSG00000024349, ENSMUSG00000026942, ENSMUSG00000037523, ENSMUSG00000035692, ENSMUSG00000021025, ENSMUSG00000020115, ENSMUSG00000027854, ENSMUSG00000028163, ENSMUSG00000031537, ENSMUSG00000030595, ENSMUSG00000004296, ENSMUSG00000034855, ENSMUSG00000032171, ENSMUSG00000026896, ENSMUSG00000021277, ENSMUSG00000027164,…	1597	68	7720	1.84832	0.362477	0.00830173	2.06033
mmu05219:Bladder cancer	18	0.474308	0.00196156	ENSMUSG00000000441, ENSMUSG00000030265, ENSMUSG00000040152, ENSMUSG00000063358, ENSMUSG00000006728, ENSMUSG00000021559, ENSMUSG00000027646, ENSMUSG00000020184, ENSMUSG00000031740, ENSMUSG00000023951, ENSMUSG00000022105, ENSMUSG00000024486, ENSMUSG00000062312, ENSMUSG00000017737, ENSMUSG00000021180, ENSMUSG00000025499, ENSMUSG00000016477, ENSMUSG00000063065	1597	41	7720	2.12227	0.430798	0.0101935	2.57241
mmu03010:Ribosome	46	1.21212	0.00198344	ENSMUSG00000062647, ENSMUSG00000032399, ENSMUSG00000029614, ENSMUSG00000060036, ENSMUSG00000000740, ENSMUSG00000025794, ENSMUSG00000058267, ENSMUSG00000062997, ENSMUSG00000046330, ENSMUSG00000046756, ENSMUSG00000039680, ENSMUSG00000060938, ENSMUSG00000030611, ENSMUSG00000067274, ENSMUSG00000049751, ENSMUSG00000029066, ENSMUSG00000048758, ENSMUSG00000058600, ENSMUSG00000061477, ENSMUSG00000052146,…	1597	145	7720	1.53357	0.434368	0.0101236	2.60076
mmu05222:Small cell lung cancer	30	0.790514	0.00213332	ENSMUSG00000031502, ENSMUSG00000031503, ENSMUSG00000026942, ENSMUSG00000022105, ENSMUSG00000015846, ENSMUSG00000026193, ENSMUSG00000026478, ENSMUSG00000032462, ENSMUSG00000032487, ENSMUSG00000027111, ENSMUSG00000013663, ENSMUSG00000021025, ENSMUSG00000028044, ENSMUSG00000028914, ENSMUSG00000039936, ENSMUSG00000019699, ENSMUSG00000026875, ENSMUSG00000041417, ENSMUSG00000028163, ENSMUSG00000031537,…	1597	84	7720	1.72645	0.458232	0.0106953	2.79473
mmu05202:Transcriptional misregulation in cancer	51	1.34387	0.00234068	ENSMUSG00000003031, ENSMUSG00000068457, ENSMUSG00000037992, ENSMUSG00000030786, ENSMUSG00000032440, ENSMUSG00000021822, ENSMUSG00000029648, ENSMUSG00000029086, ENSMUSG00000046519, ENSMUSG00000055435, ENSMUSG00000026875, ENSMUSG00000013089, ENSMUSG00000051367, ENSMUSG00000028163, ENSMUSG00000020184, ENSMUSG00000061589, ENSMUSG00000000184, ENSMUSG00000037369, ENSMUSG00000025746, ENSMUSG00000081058,…	1597	166	7720	1.48516	0.489602	0.011529	3.06249
mmu05143:African trypanosomiasis	16	0.421607	0.00241827	ENSMUSG00000027398, ENSMUSG00000032508, ENSMUSG00000024401, ENSMUSG00000024778, ENSMUSG00000037405, ENSMUSG00000004929, ENSMUSG00000004296, ENSMUSG00000078816, ENSMUSG00000045322, ENSMUSG00000039943, ENSMUSG00000040061, ENSMUSG00000050965, ENSMUSG00000025746, ENSMUSG00000027962, ENSMUSG00000027776, ENSMUSG00000039217	1597	35	7720	2.20986	0.500868	0.0117086	3.1625
mmu01200:Carbon metabolism	38	1.00132	0.00285116	ENSMUSG00000025877, ENSMUSG00000023456, ENSMUSG00000026005, ENSMUSG00000009863, ENSMUSG00000022477, ENSMUSG00000058076, ENSMUSG00000062070, ENSMUSG00000032279, ENSMUSG00000041426, ENSMUSG00000025403, ENSMUSG00000000171, ENSMUSG00000025465, ENSMUSG00000053604, ENSMUSG00000005683, ENSMUSG00000027452, ENSMUSG00000059040, ENSMUSG00000026526, ENSMUSG00000011752, ENSMUSG00000021794, ENSMUSG00000000628,…	1597	116	7720	1.58357	0.559327	0.0135647	3.71876
mmu00564:Glycerophospholipid metabolism	32	0.843215	0.00344158	ENSMUSG00000027346, ENSMUSG00000024843, ENSMUSG00000021608, ENSMUSG00000036833, ENSMUSG00000060675, ENSMUSG00000022861, ENSMUSG00000031545, ENSMUSG00000028517, ENSMUSG00000026827, ENSMUSG00000060002, ENSMUSG00000031467, ENSMUSG00000020593, ENSMUSG00000033192, ENSMUSG00000031903, ENSMUSG00000052151, ENSMUSG00000009995, ENSMUSG00000058793, ENSMUSG00000000276, ENSMUSG00000023827, ENSMUSG00000021759,…	1597	94	7720	1.64564	0.628214	0.0160894	4.47268
mmu04915:Estrogen signaling pathway	33	0.869565	0.00355375	ENSMUSG00000001280, ENSMUSG00000000441, ENSMUSG00000024462, ENSMUSG00000031740, ENSMUSG00000091971, ENSMUSG00000022220, ENSMUSG00000039943, ENSMUSG00000024486, ENSMUSG00000036438, ENSMUSG00000027230, ENSMUSG00000021948, ENSMUSG00000024222, ENSMUSG00000042406, ENSMUSG00000005580, ENSMUSG00000032462, ENSMUSG00000063065, ENSMUSG00000025958, ENSMUSG00000030265, ENSMUSG00000000001, ENSMUSG00000039936,…	1597	98	7720	1.6278	0.640033	0.0163447	4.61529
mmu04520:Adherens junction	26	0.685112	0.00384363	ENSMUSG00000007613, ENSMUSG00000004266, ENSMUSG00000005533, ENSMUSG00000032440, ENSMUSG00000032402, ENSMUSG00000021823, ENSMUSG00000022521, ENSMUSG00000062312, ENSMUSG00000024985, ENSMUSG00000063065, ENSMUSG00000006932, ENSMUSG00000025314, ENSMUSG00000027540, ENSMUSG00000030536, ENSMUSG00000063358, ENSMUSG00000019843, ENSMUSG00000027646, ENSMUSG00000033220, ENSMUSG00000009376, ENSMUSG00000025006,…	1597	72	7720	1.74563	0.668871	0.0173906	4.98293
mmu04142:Lysosome	39	1.02767	0.00398721	ENSMUSG00000005949, ENSMUSG00000002103, ENSMUSG00000033540, ENSMUSG00000026944, ENSMUSG00000016534, ENSMUSG00000035311, ENSMUSG00000004849, ENSMUSG00000025579, ENSMUSG00000030560, ENSMUSG00000005043, ENSMUSG00000028111, ENSMUSG00000021665, ENSMUSG00000021477, ENSMUSG00000022620, ENSMUSG00000023830, ENSMUSG00000001348, ENSMUSG00000031903, ENSMUSG00000028581, ENSMUSG00000016256, ENSMUSG00000038642,…	1597	122	7720	1.54532	0.68229	0.0177563	5.16455
mmu04720:Long-term potentiation	24	0.632411	0.00516852	ENSMUSG00000000441, ENSMUSG00000052681, ENSMUSG00000030265, ENSMUSG00000028161, ENSMUSG00000063358, ENSMUSG00000042644, ENSMUSG00000005034, ENSMUSG00000030287, ENSMUSG00000078816, ENSMUSG00000024617, ENSMUSG00000031309, ENSMUSG00000014956, ENSMUSG00000039943, ENSMUSG00000040061, ENSMUSG00000050965, ENSMUSG00000036438, ENSMUSG00000068798, ENSMUSG00000038128, ENSMUSG00000022521, ENSMUSG00000021820,…	1597	66	7720	1.75784	0.773998	0.0226204	6.64663
mmu04670:Leukocyte transendothelial migration	38	1.00132	0.00622801	ENSMUSG00000030830, ENSMUSG00000052681, ENSMUSG00000031740, ENSMUSG00000034868, ENSMUSG00000006519, ENSMUSG00000009621, ENSMUSG00000043733, ENSMUSG00000030786, ENSMUSG00000021823, ENSMUSG00000050965, ENSMUSG00000027962, ENSMUSG00000026430, ENSMUSG00000059456, ENSMUSG00000032462, ENSMUSG00000055976, ENSMUSG00000006932, ENSMUSG00000034116, ENSMUSG00000000001, ENSMUSG00000035133, ENSMUSG00000039936,…	1597	121	7720	1.51814	0.833545	0.0268014	7.95762
mmu04612:Antigen processing and presentation	28	0.737813	0.0062361	ENSMUSG00000024308, ENSMUSG00000024401, ENSMUSG00000003814, ENSMUSG00000060550, ENSMUSG00000016283, ENSMUSG00000037548, ENSMUSG00000022504, ENSMUSG00000061232, ENSMUSG00000079491, ENSMUSG00000091971, ENSMUSG00000021477, ENSMUSG00000067235, ENSMUSG00000073409, ENSMUSG00000073421, ENSMUSG00000038642, ENSMUSG00000025958, ENSMUSG00000056116, ENSMUSG00000067212, ENSMUSG00000078153, ENSMUSG00000022216,…	1597	82	7720	1.65066	0.833933	0.0264406	7.96757
mmu05416:Viral myocarditis	27	0.711462	0.0072424	ENSMUSG00000026842, ENSMUSG00000030830, ENSMUSG00000060550, ENSMUSG00000037548, ENSMUSG00000016283, ENSMUSG00000061232, ENSMUSG00000029156, ENSMUSG00000079491, ENSMUSG00000028760, ENSMUSG00000073409, ENSMUSG00000067235, ENSMUSG00000073421, ENSMUSG00000004446, ENSMUSG00000056116, ENSMUSG00000045103, ENSMUSG00000028914, ENSMUSG00000067212, ENSMUSG00000019843, ENSMUSG00000037405, ENSMUSG00000045983,…	1597	79	7720	1.65215	0.875834	0.0302126	9.19685
mmu04014:Ras signaling pathway	64	1.68643	0.00731096	ENSMUSG00000000441, ENSMUSG00000027347, ENSMUSG00000026842, ENSMUSG00000060675, ENSMUSG00000030589, ENSMUSG00000038387, ENSMUSG00000042826, ENSMUSG00000055723, ENSMUSG00000028019, ENSMUSG00000043733, ENSMUSG00000036438, ENSMUSG00000026430, ENSMUSG00000029648, ENSMUSG00000018334, ENSMUSG00000024959, ENSMUSG00000036402, ENSMUSG00000020115, ENSMUSG00000030265, ENSMUSG00000063358, ENSMUSG00000028163,…	1597	229	7720	1.351	0.87827	0.03006	9.28004
mmu04914:Progesterone-mediated oocyte maturation	29	0.764163	0.00765727	ENSMUSG00000000441, ENSMUSG00000020053, ENSMUSG00000019942, ENSMUSG00000029472, ENSMUSG00000005533, ENSMUSG00000022220, ENSMUSG00000032218, ENSMUSG00000027330, ENSMUSG00000039782, ENSMUSG00000032462, ENSMUSG00000005580, ENSMUSG00000063065, ENSMUSG00000030867, ENSMUSG00000030265, ENSMUSG00000027379, ENSMUSG00000000001, ENSMUSG00000063358, ENSMUSG00000039936, ENSMUSG00000019699, ENSMUSG00000041417,…	1597	87	7720	1.61135	0.88987	0.0310242	9.6992
mmu00240:Pyrimidine metabolism	33	0.869565	0.00815269	ENSMUSG00000022476, ENSMUSG00000035834, ENSMUSG00000020471, ENSMUSG00000025574, ENSMUSG00000013629, ENSMUSG00000005198, ENSMUSG00000025575, ENSMUSG00000031562, ENSMUSG00000032420, ENSMUSG00000026134, ENSMUSG00000033020, ENSMUSG00000020638, ENSMUSG00000021871, ENSMUSG00000020857, ENSMUSG00000038644, ENSMUSG00000007080, ENSMUSG00000032478, ENSMUSG00000035824, ENSMUSG00000017176, ENSMUSG00000048120,…	1597	103	7720	1.54878	0.904575	0.0325488	10.2957
mmu00190:Oxidative phosphorylation	42	1.10672	0.00816998	ENSMUSG00000037916, ENSMUSG00000009863, ENSMUSG00000005510, ENSMUSG00000024403, ENSMUSG00000038690, ENSMUSG00000050856, ENSMUSG00000058076, ENSMUSG00000025204, ENSMUSG00000035885, ENSMUSG00000027673, ENSMUSG00000003072, ENSMUSG00000018770, ENSMUSG00000064345, ENSMUSG00000061518, ENSMUSG00000064363, ENSMUSG00000006057, ENSMUSG00000064341, ENSMUSG00000022956, ENSMUSG00000000171, ENSMUSG00000031231,…	1597	139	7720	1.46065	0.905051	0.0321713	10.3165
mmu04015:Rap1 signaling pathway	60	1.58103	0.00880243	ENSMUSG00000000441, ENSMUSG00000030830, ENSMUSG00000002699, ENSMUSG00000018293, ENSMUSG00000018500, ENSMUSG00000038387, ENSMUSG00000020178, ENSMUSG00000042826, ENSMUSG00000035954, ENSMUSG00000022220, ENSMUSG00000028019, ENSMUSG00000039943, ENSMUSG00000030786, ENSMUSG00000039844, ENSMUSG00000036438, ENSMUSG00000026430, ENSMUSG00000029648, ENSMUSG00000005580, ENSMUSG00000020689, ENSMUSG00000006932,…	1597	214	7720	1.35535	0.920935	0.0341628	11.0726
mmu05214:Glioma	23	0.606061	0.00904617	ENSMUSG00000000441, ENSMUSG00000030265, ENSMUSG00000020053, ENSMUSG00000063358, ENSMUSG00000039936, ENSMUSG00000019699, ENSMUSG00000041417, ENSMUSG00000006728, ENSMUSG00000078816, ENSMUSG00000021448, ENSMUSG00000020184, ENSMUSG00000005533, ENSMUSG00000024617, ENSMUSG00000022105, ENSMUSG00000050965, ENSMUSG00000024620, ENSMUSG00000036438, ENSMUSG00000021820, ENSMUSG00000025499, ENSMUSG00000016477,…	1597	65	7720	1.71051	0.926323	0.0346303	11.3624
mmu05016:Huntington's disease	56	1.47563	0.0095349	ENSMUSG00000037916, ENSMUSG00000005510, ENSMUSG00000009863, ENSMUSG00000037820, ENSMUSG00000058076, ENSMUSG00000025204, ENSMUSG00000003072, ENSMUSG00000018770, ENSMUSG00000061518, ENSMUSG00000006057, ENSMUSG00000039943, ENSMUSG00000000171, ENSMUSG00000022956, ENSMUSG00000022841, ENSMUSG00000033020, ENSMUSG00000021764, ENSMUSG00000059534, ENSMUSG00000021868, ENSMUSG00000025651, ENSMUSG00000030884,…	1597	198	7720	1.36721	0.936049	0.035998	11.9408
mmu05169:Epstein-Barr virus infection	60	1.58103	0.0097538	ENSMUSG00000001424, ENSMUSG00000030830, ENSMUSG00000003031, ENSMUSG00000029430, ENSMUSG00000016283, ENSMUSG00000021457, ENSMUSG00000026942, ENSMUSG00000091971, ENSMUSG00000033020, ENSMUSG00000021025, ENSMUSG00000056116, ENSMUSG00000029084, ENSMUSG00000020115, ENSMUSG00000026875, ENSMUSG00000028163, ENSMUSG00000002625, ENSMUSG00000005034, ENSMUSG00000020184, ENSMUSG00000021277, ENSMUSG00000090877,…	1597	215	7720	1.34904	0.93998	0.0363376	12.1988
mmu04070:Phosphatidylinositol signaling system	31	0.816864	0.0109178	ENSMUSG00000034570, ENSMUSG00000025949, ENSMUSG00000026737, ENSMUSG00000022861, ENSMUSG00000024525, ENSMUSG00000039943, ENSMUSG00000050965, ENSMUSG00000030660, ENSMUSG00000036438, ENSMUSG00000022973, ENSMUSG00000027296, ENSMUSG00000058793, ENSMUSG00000032462, ENSMUSG00000025178, ENSMUSG00000013663, ENSMUSG00000000276, ENSMUSG00000029186, ENSMUSG00000026925, ENSMUSG00000039936, ENSMUSG00000026113,…	1597	97	7720	1.54491	0.957175	0.0400915	13.5588
mmu04725:Cholinergic synapse	35	0.922266	0.0110431	ENSMUSG00000015968, ENSMUSG00000041695, ENSMUSG00000043004, ENSMUSG00000024617, ENSMUSG00000022220, ENSMUSG00000004113, ENSMUSG00000039943, ENSMUSG00000050965, ENSMUSG00000038128, ENSMUSG00000027230, ENSMUSG00000021820, ENSMUSG00000042406, ENSMUSG00000005580, ENSMUSG00000032462, ENSMUSG00000063065, ENSMUSG00000031142, ENSMUSG00000025958, ENSMUSG00000036402, ENSMUSG00000024789, ENSMUSG00000030265,…	1597	113	7720	1.49728	0.958704	0.0400354	13.704
mmu04120:Ubiquitin mediated proteolysis	42	1.10672	0.011974	ENSMUSG00000024589, ENSMUSG00000060860, ENSMUSG00000023286, ENSMUSG00000024740, ENSMUSG00000001924, ENSMUSG00000029472, ENSMUSG00000017146, ENSMUSG00000036986, ENSMUSG00000024807, ENSMUSG00000055839, ENSMUSG00000070923, ENSMUSG00000027078, ENSMUSG00000019927, ENSMUSG00000022184, ENSMUSG00000018363, ENSMUSG00000001403, ENSMUSG00000006398, ENSMUSG00000025326, ENSMUSG00000002109, ENSMUSG00000053113,…	1597	142	7720	1.42979	0.968485	0.0428193	14.776
mmu05211:Renal cell carcinoma	23	0.606061	0.0132438	ENSMUSG00000000441, ENSMUSG00000032633, ENSMUSG00000026526, ENSMUSG00000052681, ENSMUSG00000030265, ENSMUSG00000021109, ENSMUSG00000028864, ENSMUSG00000063358, ENSMUSG00000039936, ENSMUSG00000019699, ENSMUSG00000041417, ENSMUSG00000009376, ENSMUSG00000055839, ENSMUSG00000043733, ENSMUSG00000023951, ENSMUSG00000035105, ENSMUSG00000028645, ENSMUSG00000039844, ENSMUSG00000068798, ENSMUSG00000022521,…	1597	67	7720	1.65945	0.978212	0.0467039	16.2183
mmu04144:Endocytosis	74	1.94993	0.01331	ENSMUSG00000007613, ENSMUSG00000048480, ENSMUSG00000003228, ENSMUSG00000026770, ENSMUSG00000035283, ENSMUSG00000016283, ENSMUSG00000020078, ENSMUSG00000091971, ENSMUSG00000032402, ENSMUSG00000032440, ENSMUSG00000022841, ENSMUSG00000029648, ENSMUSG00000079227, ENSMUSG00000023830, ENSMUSG00000024772, ENSMUSG00000027293, ENSMUSG00000031600, ENSMUSG00000060216, ENSMUSG00000056116, ENSMUSG00000037126,…	1597	278	7720	1.28677	0.978627	0.0463674	16.2929
mmu05218:Melanoma	24	0.632411	0.0136238	ENSMUSG00000000441, ENSMUSG00000024959, ENSMUSG00000030265, ENSMUSG00000020053, ENSMUSG00000035158, ENSMUSG00000028864, ENSMUSG00000063358, ENSMUSG00000039936, ENSMUSG00000019699, ENSMUSG00000041417, ENSMUSG00000006728, ENSMUSG00000042826, ENSMUSG00000009376, ENSMUSG00000020184, ENSMUSG00000005533, ENSMUSG00000028019, ENSMUSG00000022105, ENSMUSG00000024620, ENSMUSG00000036585, ENSMUSG00000025499,…	1597	71	7720	1.63405	0.980491	0.0468767	16.6455
mmu05210:Colorectal cancer	22	0.57971	0.015425	ENSMUSG00000000441, ENSMUSG00000024959, ENSMUSG00000005370, ENSMUSG00000007613, ENSMUSG00000006932, ENSMUSG00000030265, ENSMUSG00000028914, ENSMUSG00000026821, ENSMUSG00000063358, ENSMUSG00000039936, ENSMUSG00000019699, ENSMUSG00000041417, ENSMUSG00000017716, ENSMUSG00000033220, ENSMUSG00000022812, ENSMUSG00000032402, ENSMUSG00000032440, ENSMUSG00000005871, ENSMUSG00000040760, ENSMUSG00000024985,…	1597	64	7720	1.66171	0.988455	0.0523336	18.6433
mmu04920:Adipocytokine signaling pathway	24	0.632411	0.0162077	ENSMUSG00000021025, ENSMUSG00000018796, ENSMUSG00000020785, ENSMUSG00000024789, ENSMUSG00000002944, ENSMUSG00000024401, ENSMUSG00000030341, ENSMUSG00000047182, ENSMUSG00000019699, ENSMUSG00000028163, ENSMUSG00000023947, ENSMUSG00000030595, ENSMUSG00000031537, ENSMUSG00000057722, ENSMUSG00000026942, ENSMUSG00000043733, ENSMUSG00000038205, ENSMUSG00000015846, ENSMUSG00000028645, ENSMUSG00000040618,…	1597	72	7720	1.61135	0.990811	0.0542999	19.4975
mmu04071:Sphingolipid signaling pathway	37	0.974967	0.0162779	ENSMUSG00000000441, ENSMUSG00000038633, ENSMUSG00000024401, ENSMUSG00000027035, ENSMUSG00000071369, ENSMUSG00000026942, ENSMUSG00000028245, ENSMUSG00000007564, ENSMUSG00000039943, ENSMUSG00000050965, ENSMUSG00000021263, ENSMUSG00000032462, ENSMUSG00000063065, ENSMUSG00000013663, ENSMUSG00000004446, ENSMUSG00000040451, ENSMUSG00000030341, ENSMUSG00000030265, ENSMUSG00000061878, ENSMUSG00000000001,…	1597	124	7720	1.44242	0.990997	0.0539066	19.5737
mmu03320:PPAR signaling pathway	26	0.685112	0.016696	ENSMUSG00000027533, ENSMUSG00000019874, ENSMUSG00000026003, ENSMUSG00000030546, ENSMUSG00000018796, ENSMUSG00000066071, ENSMUSG00000026170, ENSMUSG00000015846, ENSMUSG00000040618, ENSMUSG00000024981, ENSMUSG00000028603, ENSMUSG00000031808, ENSMUSG00000031278, ENSMUSG00000002108, ENSMUSG00000002944, ENSMUSG00000015568, ENSMUSG00000025059, ENSMUSG00000026385, ENSMUSG00000025006, ENSMUSG00000062908,…	1597	80	7720	1.57107	0.992031	0.054639	20.0263
mmu04912:GnRH signaling pathway	28	0.737813	0.0169487	ENSMUSG00000000441, ENSMUSG00000024383, ENSMUSG00000015968, ENSMUSG00000031740, ENSMUSG00000024617, ENSMUSG00000022220, ENSMUSG00000039943, ENSMUSG00000024486, ENSMUSG00000050965, ENSMUSG00000036438, ENSMUSG00000021820, ENSMUSG00000021948, ENSMUSG00000042406, ENSMUSG00000059456, ENSMUSG00000005580, ENSMUSG00000063065, ENSMUSG00000031142, ENSMUSG00000030265, ENSMUSG00000000957, ENSMUSG00000063358,…	1597	88	7720	1.53811	0.992598	0.0548301	20.2987
mmu04919:Thyroid hormone signaling pathway	34	0.895916	0.0190832	ENSMUSG00000000441, ENSMUSG00000033083, ENSMUSG00000040907, ENSMUSG00000021109, ENSMUSG00000000708, ENSMUSG00000026104, ENSMUSG00000039943, ENSMUSG00000015846, ENSMUSG00000050965, ENSMUSG00000028645, ENSMUSG00000022521, ENSMUSG00000032462, ENSMUSG00000063065, ENSMUSG00000020689, ENSMUSG00000024959, ENSMUSG00000006932, ENSMUSG00000034297, ENSMUSG00000033161, ENSMUSG00000028914, ENSMUSG00000030265,…	1597	113	7720	1.4545	0.996033	0.0609051	22.5652
mmu04930:Type II diabetes mellitus	18	0.474308	0.0194353	ENSMUSG00000025877, ENSMUSG00000000628, ENSMUSG00000024401, ENSMUSG00000034656, ENSMUSG00000047182, ENSMUSG00000063358, ENSMUSG00000039936, ENSMUSG00000041417, ENSMUSG00000015968, ENSMUSG00000031537, ENSMUSG00000004113, ENSMUSG00000038037, ENSMUSG00000048379, ENSMUSG00000021948, ENSMUSG00000053113, ENSMUSG00000037012, ENSMUSG00000032462, ENSMUSG00000063065	1597	50	7720	1.74026	0.996422	0.0613291	22.9333
mmu00561:Glycerolipid metabolism	20	0.527009	0.0209736	ENSMUSG00000000276, ENSMUSG00000024768, ENSMUSG00000023827, ENSMUSG00000021759, ENSMUSG00000053846, ENSMUSG00000022861, ENSMUSG00000015568, ENSMUSG00000031545, ENSMUSG00000025059, ENSMUSG00000028517, ENSMUSG00000035561, ENSMUSG00000040479, ENSMUSG00000001211, ENSMUSG00000025357, ENSMUSG00000034371, ENSMUSG00000031467, ENSMUSG00000020593, ENSMUSG00000052151, ENSMUSG00000041653, ENSMUSG00000026922	1597	58	7720	1.66692	0.99772	0.0653601	24.5227
mmu05020:Prion diseases	13	0.342556	0.0212494	ENSMUSG00000079037, ENSMUSG00000036887, ENSMUSG00000025746, ENSMUSG00000035042, ENSMUSG00000027398, ENSMUSG00000063358, ENSMUSG00000019843, ENSMUSG00000027399, ENSMUSG00000036905, ENSMUSG00000005034, ENSMUSG00000026478, ENSMUSG00000063065, ENSMUSG00000026864	1597	32	7720	1.96384	0.997897	0.0654961	24.8043
mmu04931:Insulin resistance	33	0.869565	0.0219331	ENSMUSG00000033871, ENSMUSG00000039515, ENSMUSG00000033083, ENSMUSG00000024401, ENSMUSG00000025220, ENSMUSG00000003865, ENSMUSG00000043733, ENSMUSG00000028645, ENSMUSG00000027230, ENSMUSG00000034160, ENSMUSG00000021948, ENSMUSG00000040618, ENSMUSG00000053113, ENSMUSG00000031808, ENSMUSG00000032462, ENSMUSG00000002108, ENSMUSG00000013663, ENSMUSG00000025958, ENSMUSG00000021025, ENSMUSG00000046794,…	1597	110	7720	1.45022	0.998279	0.0668442	25.4985
mmu00562:Inositol phosphate metabolism	23	0.606061	0.0222896	ENSMUSG00000034570, ENSMUSG00000023456, ENSMUSG00000029186, ENSMUSG00000026925, ENSMUSG00000024896, ENSMUSG00000025949, ENSMUSG00000026737, ENSMUSG00000026113, ENSMUSG00000039936, ENSMUSG00000019139, ENSMUSG00000024525, ENSMUSG00000039943, ENSMUSG00000025417, ENSMUSG00000040061, ENSMUSG00000030660, ENSMUSG00000022973, ENSMUSG00000025477, ENSMUSG00000027296, ENSMUSG00000030269, ENSMUSG00000057963,…	1597	70	7720	1.58834	0.99845	0.0671999	25.8582
mmu05132:Salmonella infection	25	0.658762	0.0226751	ENSMUSG00000029380, ENSMUSG00000018930, ENSMUSG00000018293, ENSMUSG00000032508, ENSMUSG00000024862, ENSMUSG00000079164, ENSMUSG00000051439, ENSMUSG00000029379, ENSMUSG00000000982, ENSMUSG00000020009, ENSMUSG00000021288, ENSMUSG00000027805, ENSMUSG00000063065, ENSMUSG00000039217, ENSMUSG00000030793, ENSMUSG00000028917, ENSMUSG00000027398, ENSMUSG00000035770, ENSMUSG00000063358, ENSMUSG00000027399,…	1597	78	7720	1.54938	0.998616	0.0676327	26.2452
mmu05323:Rheumatoid arthritis	26	0.685112	0.0227548	ENSMUSG00000025929, ENSMUSG00000030830, ENSMUSG00000024403, ENSMUSG00000024401, ENSMUSG00000037548, ENSMUSG00000023951, ENSMUSG00000028111, ENSMUSG00000014599, ENSMUSG00000035042, ENSMUSG00000000982, ENSMUSG00000021477, ENSMUSG00000029648, ENSMUSG00000001348, ENSMUSG00000073421, ENSMUSG00000039217, ENSMUSG00000024399, ENSMUSG00000027398, ENSMUSG00000027399, ENSMUSG00000037405, ENSMUSG00000027995,…	1597	82	7720	1.53275	0.998648	0.067175	26.325
mmu04540:Gap junction	27	0.711462	0.0227715	ENSMUSG00000000441, ENSMUSG00000024383, ENSMUSG00000035283, ENSMUSG00000019942, ENSMUSG00000023004, ENSMUSG00000028019, ENSMUSG00000030137, ENSMUSG00000022220, ENSMUSG00000039943, ENSMUSG00000050965, ENSMUSG00000043091, ENSMUSG00000005580, ENSMUSG00000063065, ENSMUSG00000001525, ENSMUSG00000072235, ENSMUSG00000030265, ENSMUSG00000000001, ENSMUSG00000063358, ENSMUSG00000042644, ENSMUSG00000030287,…	1597	86	7720	1.51767	0.998654	0.0665467	26.3418
mmu00480:Glutathione metabolism	19	0.500659	0.0244899	ENSMUSG00000074604, ENSMUSG00000026688, ENSMUSG00000025934, ENSMUSG00000006344, ENSMUSG00000011179, ENSMUSG00000022292, ENSMUSG00000025068, ENSMUSG00000058135, ENSMUSG00000063856, ENSMUSG00000032350, ENSMUSG00000006442, ENSMUSG00000027610, ENSMUSG00000028124, ENSMUSG00000039682, ENSMUSG00000039062, ENSMUSG00000027890, ENSMUSG00000022562, ENSMUSG00000030978, ENSMUSG00000020649	1597	55	7720	1.66995	0.999188	0.0707354	28.0424
mmu03430:Mismatch repair	10	0.263505	0.0245617	ENSMUSG00000038644, ENSMUSG00000005370, ENSMUSG00000056394, ENSMUSG00000020471, ENSMUSG00000023104, ENSMUSG00000028884, ENSMUSG00000039748, ENSMUSG00000022881, ENSMUSG00000029191, ENSMUSG00000029363	1597	22	7720	2.1973	0.999205	0.0702401	28.1128
mmu00220:Arginine biosynthesis	9	0.237154	0.0279234	ENSMUSG00000026473, ENSMUSG00000020826, ENSMUSG00000021794, ENSMUSG00000019987, ENSMUSG00000026103, ENSMUSG00000021125, ENSMUSG00000031672, ENSMUSG00000025190, ENSMUSG00000076441	1597	19	7720	2.28982	0.999705	0.0788215	31.3324
mmu05332:Graft-versus-host disease	18	0.474308	0.0286256	ENSMUSG00000056116, ENSMUSG00000027398, ENSMUSG00000024401, ENSMUSG00000024778, ENSMUSG00000067212, ENSMUSG00000027399, ENSMUSG00000060550, ENSMUSG00000016283, ENSMUSG00000037548, ENSMUSG00000061232, ENSMUSG00000079491, ENSMUSG00000024334, ENSMUSG00000025746, ENSMUSG00000016206, ENSMUSG00000067235, ENSMUSG00000073409, ENSMUSG00000022901, ENSMUSG00000073421	1597	52	7720	1.67333	0.99976	0.0799748	31.9878
mmu05223:Non-small cell lung cancer	19	0.500659	0.0293266	ENSMUSG00000000441, ENSMUSG00000024959, ENSMUSG00000030265, ENSMUSG00000028914, ENSMUSG00000063358, ENSMUSG00000039936, ENSMUSG00000019699, ENSMUSG00000041417, ENSMUSG00000006728, ENSMUSG00000078816, ENSMUSG00000022105, ENSMUSG00000015846, ENSMUSG00000050965, ENSMUSG00000062312, ENSMUSG00000026430, ENSMUSG00000025499, ENSMUSG00000016477, ENSMUSG00000032462, ENSMUSG00000063065	1597	56	7720	1.64013	0.999805	0.0811022	32.6364
mmu04810:Regulation of actin cytoskeleton	57	1.50198	0.0293947	ENSMUSG00000000441, ENSMUSG00000030830, ENSMUSG00000018293, ENSMUSG00000026737, ENSMUSG00000038387, ENSMUSG00000042284, ENSMUSG00000042826, ENSMUSG00000055723, ENSMUSG00000034868, ENSMUSG00000009621, ENSMUSG00000028019, ENSMUSG00000030786, ENSMUSG00000021823, ENSMUSG00000030789, ENSMUSG00000070369, ENSMUSG00000026193, ENSMUSG00000027111, ENSMUSG00000020689, ENSMUSG00000036402, ENSMUSG00000028068,…	1597	214	7720	1.28758	0.999809	0.0805215	32.6991
mmu04512:ECM-receptor interaction	27	0.711462	0.0301983	ENSMUSG00000020330, ENSMUSG00000031502, ENSMUSG00000004098, ENSMUSG00000031503, ENSMUSG00000001281, ENSMUSG00000040152, ENSMUSG00000021702, ENSMUSG00000042284, ENSMUSG00000026193, ENSMUSG00000020592, ENSMUSG00000026478, ENSMUSG00000005087, ENSMUSG00000027111, ENSMUSG00000020689, ENSMUSG00000029304, ENSMUSG00000017009, ENSMUSG00000048126, ENSMUSG00000022817, ENSMUSG00000002944, ENSMUSG00000028047,…	1597	88	7720	1.48318	0.999849	0.081893	33.4349
mmu05231:Choline metabolism in cancer	30	0.790514	0.0332715	ENSMUSG00000000441, ENSMUSG00000027346, ENSMUSG00000024843, ENSMUSG00000001280, ENSMUSG00000028412, ENSMUSG00000026821, ENSMUSG00000021109, ENSMUSG00000022861, ENSMUSG00000028517, ENSMUSG00000028019, ENSMUSG00000050965, ENSMUSG00000060002, ENSMUSG00000052151, ENSMUSG00000032462, ENSMUSG00000063065, ENSMUSG00000000276, ENSMUSG00000021759, ENSMUSG00000030265, ENSMUSG00000039936, ENSMUSG00000019699,…	1597	101	7720	1.43586	0.999939	0.0891514	36.1808
mmu04611:Platelet activation	37	0.974967	0.0366814	ENSMUSG00000027347, ENSMUSG00000004098, ENSMUSG00000052681, ENSMUSG00000029925, ENSMUSG00000002699, ENSMUSG00000021457, ENSMUSG00000034868, ENSMUSG00000022220, ENSMUSG00000039943, ENSMUSG00000047250, ENSMUSG00000005580, ENSMUSG00000032462, ENSMUSG00000063065, ENSMUSG00000020689, ENSMUSG00000000001, ENSMUSG00000063358, ENSMUSG00000039936, ENSMUSG00000019699, ENSMUSG00000019843, ENSMUSG00000042644,…	1597	131	7720	1.36535	0.999978	0.0971039	39.1048
mmu01040:Biosynthesis of unsaturated fatty acids	11	0.289855	0.0372493	ENSMUSG00000028937, ENSMUSG00000036138, ENSMUSG00000010663, ENSMUSG00000028497, ENSMUSG00000010651, ENSMUSG00000027195, ENSMUSG00000021226, ENSMUSG00000029098, ENSMUSG00000072949, ENSMUSG00000041220, ENSMUSG00000032349	1597	27	7720	1.96943	0.999981	0.097675	39.5795
Gene expression, RES day 3 vs RES day 6
Term	Count	%	PValue	Genes	List Total	Pop Hits	Pop Total	Fold Enrichment	Bonferroni	Benjamini	FDR
mmu03030:DNA replication	30	0.718219	7.00148e-14	ENSMUSG00000020471, ENSMUSG00000028884, ENSMUSG00000022881, ENSMUSG00000027342, ENSMUSG00000024742, ENSMUSG00000056394, ENSMUSG00000026134, ENSMUSG00000023104, ENSMUSG00000029730, ENSMUSG00000033970, ENSMUSG00000052926, ENSMUSG00000030042, ENSMUSG00000038644, ENSMUSG00000007080, ENSMUSG00000030726, ENSMUSG00000002870, ENSMUSG00000024854, ENSMUSG00000000751, ENSMUSG00000006678, ENSMUSG00000005410,…	1757	35	7720	3.76616	2.01759e-11	2.01759e-11	9.30367e-11
mmu03050:Proteasome	35	0.837922	7.27134e-14	ENSMUSG00000026914, ENSMUSG00000002102, ENSMUSG00000015671, ENSMUSG00000031897, ENSMUSG00000020720, ENSMUSG00000096727, ENSMUSG00000026229, ENSMUSG00000060073, ENSMUSG00000026750, ENSMUSG00000018286, ENSMUSG00000025487, ENSMUSG00000029649, ENSMUSG00000032301, ENSMUSG00000005779, ENSMUSG00000017221, ENSMUSG00000021024, ENSMUSG00000069744, ENSMUSG00000078153, ENSMUSG00000022216, ENSMUSG00000079197,…	1757	45	7720	3.41744	2.09432e-11	1.04716e-11	9.65672e-11
mmu04110:Cell cycle	64	1.5322	5.87387e-12	ENSMUSG00000032113, ENSMUSG00000003031, ENSMUSG00000002603, ENSMUSG00000020849, ENSMUSG00000029472, ENSMUSG00000027342, ENSMUSG00000021453, ENSMUSG00000015312, ENSMUSG00000032402, ENSMUSG00000038416, ENSMUSG00000031016, ENSMUSG00000032218, ENSMUSG00000028587, ENSMUSG00000006398, ENSMUSG00000017499, ENSMUSG00000027490, ENSMUSG00000038379, ENSMUSG00000027641, ENSMUSG00000006728, ENSMUSG00000031697,…	1757	124	7720	2.2678	1.69167e-09	5.6389e-10	7.80037e-09
mmu03430:Mismatch repair	19	0.454872	6.94749e-09	ENSMUSG00000038644, ENSMUSG00000005370, ENSMUSG00000030726, ENSMUSG00000020471, ENSMUSG00000014850, ENSMUSG00000024854, ENSMUSG00000028884, ENSMUSG00000000751, ENSMUSG00000022881, ENSMUSG00000027342, ENSMUSG00000079109, ENSMUSG00000056394, ENSMUSG00000023104, ENSMUSG00000033970, ENSMUSG00000039748, ENSMUSG00000029191, ENSMUSG00000032498, ENSMUSG00000029363, ENSMUSG00000024151	1757	22	7720	3.79469	2.00087e-06	5.00219e-07	9.22613e-06
mmu05166:HTLV-I infection	102	2.44194	1.22305e-07	ENSMUSG00000020471, ENSMUSG00000030830, ENSMUSG00000029430, ENSMUSG00000079547, ENSMUSG00000038418, ENSMUSG00000016283, ENSMUSG00000038416, ENSMUSG00000032440, ENSMUSG00000028645, ENSMUSG00000027962, ENSMUSG00000006398, ENSMUSG00000020484, ENSMUSG00000028161, ENSMUSG00000020402, ENSMUSG00000006728, ENSMUSG00000031659, ENSMUSG00000020700, ENSMUSG00000007659, ENSMUSG00000031304, ENSMUSG00000025499,…	1757	278	7720	1.61213	3.52232e-05	7.04475e-06	0.000162419
mmu04115:p53 signaling pathway	36	0.861863	1.25845e-07	ENSMUSG00000032113, ENSMUSG00000070348, ENSMUSG00000024778, ENSMUSG00000020053, ENSMUSG00000040152, ENSMUSG00000019942, ENSMUSG00000024521, ENSMUSG00000036390, ENSMUSG00000022385, ENSMUSG00000021453, ENSMUSG00000015312, ENSMUSG00000032218, ENSMUSG00000038332, ENSMUSG00000059552, ENSMUSG00000029521, ENSMUSG00000029397, ENSMUSG00000013663, ENSMUSG00000028212, ENSMUSG00000027215, ENSMUSG00000004446,…	1757	67	7720	2.36088	3.62427e-05	6.04055e-06	0.00016712
mmu04380:Osteoclast differentiation	56	1.34068	1.25954e-07	ENSMUSG00000007613, ENSMUSG00000002699, ENSMUSG00000078783, ENSMUSG00000070873, ENSMUSG00000002603, ENSMUSG00000029135, ENSMUSG00000026942, ENSMUSG00000032440, ENSMUSG00000020941, ENSMUSG00000021025, ENSMUSG00000037902, ENSMUSG00000095028, ENSMUSG00000027398, ENSMUSG00000028161, ENSMUSG00000027399, ENSMUSG00000023964, ENSMUSG00000024912, ENSMUSG00000030579, ENSMUSG00000022967, ENSMUSG00000022092,…	1757	126	7720	1.95282	3.6274e-05	5.18209e-06	0.000167264
mmu05161:Hepatitis B	62	1.48432	1.79066e-07	ENSMUSG00000000441, ENSMUSG00000007613, ENSMUSG00000042349, ENSMUSG00000003031, ENSMUSG00000033730, ENSMUSG00000032508, ENSMUSG00000024778, ENSMUSG00000002603, ENSMUSG00000002147, ENSMUSG00000027342, ENSMUSG00000037523, ENSMUSG00000042406, ENSMUSG00000013663, ENSMUSG00000021025, ENSMUSG00000027490, ENSMUSG00000020115, ENSMUSG00000006728, ENSMUSG00000027646, ENSMUSG00000022967, ENSMUSG00000024515,…	1757	146	7720	1.86588	5.15697e-05	6.44635e-06	0.000237796
mmu04668:TNF signaling pathway	49	1.17309	5.77431e-07	ENSMUSG00000029380, ENSMUSG00000055994, ENSMUSG00000024778, ENSMUSG00000021367, ENSMUSG00000026942, ENSMUSG00000022221, ENSMUSG00000035042, ENSMUSG00000053175, ENSMUSG00000027962, ENSMUSG00000029379, ENSMUSG00000042406, ENSMUSG00000032487, ENSMUSG00000012519, ENSMUSG00000020941, ENSMUSG00000021025, ENSMUSG00000025076, ENSMUSG00000027398, ENSMUSG00000026875, ENSMUSG00000034855, ENSMUSG00000027598,…	1757	109	7720	1.97522	0.000166286	1.84776e-05	0.000766814
mmu04932:Non-alcoholic fatty liver disease (NAFLD)	64	1.5322	6.36264e-07	ENSMUSG00000037916, ENSMUSG00000027381, ENSMUSG00000020022, ENSMUSG00000024778, ENSMUSG00000058076, ENSMUSG00000002603, ENSMUSG00000061518, ENSMUSG00000026942, ENSMUSG00000030785, ENSMUSG00000000171, ENSMUSG00000025408, ENSMUSG00000044894, ENSMUSG00000021764, ENSMUSG00000059534, ENSMUSG00000025651, ENSMUSG00000028944, ENSMUSG00000042406, ENSMUSG00000002108, ENSMUSG00000021116, ENSMUSG00000025076,…	1757	157	7720	1.79112	0.000183227	1.83242e-05	0.000844943
mmu04068:FoxO signaling pathway	56	1.34068	1.4099e-06	ENSMUSG00000000441, ENSMUSG00000007613, ENSMUSG00000027381, ENSMUSG00000022433, ENSMUSG00000003031, ENSMUSG00000007617, ENSMUSG00000048756, ENSMUSG00000002603, ENSMUSG00000001127, ENSMUSG00000002413, ENSMUSG00000021453, ENSMUSG00000015312, ENSMUSG00000055148, ENSMUSG00000032402, ENSMUSG00000032440, ENSMUSG00000032218, ENSMUSG00000025758, ENSMUSG00000028944, ENSMUSG00000013663, ENSMUSG00000022358,…	1757	134	7720	1.83624	0.000405968	3.6913e-05	0.0018723
mmu03410:Base excision repair	22	0.526694	2.25394e-06	ENSMUSG00000038644, ENSMUSG00000007080, ENSMUSG00000039396, ENSMUSG00000030726, ENSMUSG00000020471, ENSMUSG00000020697, ENSMUSG00000024854, ENSMUSG00000023249, ENSMUSG00000028687, ENSMUSG00000026496, ENSMUSG00000035121, ENSMUSG00000027342, ENSMUSG00000024742, ENSMUSG00000056394, ENSMUSG00000029591, ENSMUSG00000034674, ENSMUSG00000054509, ENSMUSG00000028394, ENSMUSG00000020974, ENSMUSG00000030322,…	1757	35	7720	2.76185	0.000648924	5.40931e-05	0.00299314
mmu05134:Legionellosis	30	0.718219	3.05105e-06	ENSMUSG00000029380, ENSMUSG00000025225, ENSMUSG00000024401, ENSMUSG00000032508, ENSMUSG00000071203, ENSMUSG00000009112, ENSMUSG00000091971, ENSMUSG00000030786, ENSMUSG00000029379, ENSMUSG00000025980, ENSMUSG00000039217, ENSMUSG00000030793, ENSMUSG00000039005, ENSMUSG00000021025, ENSMUSG00000025076, ENSMUSG00000027398, ENSMUSG00000028914, ENSMUSG00000027995, ENSMUSG00000000290, ENSMUSG00000020088,…	1757	57	7720	2.31255	0.000878317	6.75903e-05	0.00405166
mmu05140:Leishmaniasis	32	0.7661	5.31098e-06	ENSMUSG00000059883, ENSMUSG00000037649, ENSMUSG00000024401, ENSMUSG00000032508, ENSMUSG00000002603, ENSMUSG00000079547, ENSMUSG00000037548, ENSMUSG00000004266, ENSMUSG00000026104, ENSMUSG00000030786, ENSMUSG00000059498, ENSMUSG00000020009, ENSMUSG00000047945, ENSMUSG00000032487, ENSMUSG00000063065, ENSMUSG00000039005, ENSMUSG00000021025, ENSMUSG00000024789, ENSMUSG00000027398, ENSMUSG00000027009,…	1757	64	7720	2.19693	0.0015284	0.000109249	0.00705265
mmu05321:Inflammatory bowel disease (IBD)	30	0.718219	7.38846e-06	ENSMUSG00000025929, ENSMUSG00000037649, ENSMUSG00000024401, ENSMUSG00000055994, ENSMUSG00000018341, ENSMUSG00000002603, ENSMUSG00000079547, ENSMUSG00000002147, ENSMUSG00000037548, ENSMUSG00000026104, ENSMUSG00000032402, ENSMUSG00000032238, ENSMUSG00000020009, ENSMUSG00000000791, ENSMUSG00000049093, ENSMUSG00000039217, ENSMUSG00000039005, ENSMUSG00000027398, ENSMUSG00000030748, ENSMUSG00000074695,…	1757	59	7720	2.23416	0.00212562	0.000141849	0.00981129
mmu03040:Spliceosome	53	1.26885	1.4383e-05	ENSMUSG00000030216, ENSMUSG00000028609, ENSMUSG00000039630, ENSMUSG00000074088, ENSMUSG00000037993, ENSMUSG00000091971, ENSMUSG00000040824, ENSMUSG00000031683, ENSMUSG00000059208, ENSMUSG00000028902, ENSMUSG00000037475, ENSMUSG00000033732, ENSMUSG00000020180, ENSMUSG00000025580, ENSMUSG00000024217, ENSMUSG00000024853, ENSMUSG00000002524, ENSMUSG00000028330, ENSMUSG00000024097, ENSMUSG00000021500,…	1757	133	7720	1.75093	0.00413378	0.000258863	0.0190987
mmu05164:Influenza A	63	1.50826	3.62145e-05	ENSMUSG00000000441, ENSMUSG00000042349, ENSMUSG00000029613, ENSMUSG00000032508, ENSMUSG00000024778, ENSMUSG00000079547, ENSMUSG00000037523, ENSMUSG00000091971, ENSMUSG00000029580, ENSMUSG00000026159, ENSMUSG00000035042, ENSMUSG00000021116, ENSMUSG00000000275, ENSMUSG00000021025, ENSMUSG00000024789, ENSMUSG00000020115, ENSMUSG00000020641, ENSMUSG00000027398, ENSMUSG00000027399, ENSMUSG00000020402,…	1757	171	7720	1.61879	0.0103758	0.00061334	0.0480815
mmu05215:Prostate cancer	38	0.909744	3.91898e-05	ENSMUSG00000000441, ENSMUSG00000003031, ENSMUSG00000070348, ENSMUSG00000020053, ENSMUSG00000000782, ENSMUSG00000001127, ENSMUSG00000002413, ENSMUSG00000028698, ENSMUSG00000005533, ENSMUSG00000028019, ENSMUSG00000027230, ENSMUSG00000022521, ENSMUSG00000062312, ENSMUSG00000004056, ENSMUSG00000059552, ENSMUSG00000042406, ENSMUSG00000024985, ENSMUSG00000032462, ENSMUSG00000013663, ENSMUSG00000063065,…	1757	88	7720	1.89735	0.0112234	0.000626852	0.0520307
mmu03013:RNA transport	62	1.48432	5.93863e-05	ENSMUSG00000030738, ENSMUSG00000028609, ENSMUSG00000029430, ENSMUSG00000067194, ENSMUSG00000074656, ENSMUSG00000028156, ENSMUSG00000034826, ENSMUSG00000055760, ENSMUSG00000030298, ENSMUSG00000032939, ENSMUSG00000022884, ENSMUSG00000038759, ENSMUSG00000029715, ENSMUSG00000040034, ENSMUSG00000036572, ENSMUSG00000037475, ENSMUSG00000021116, ENSMUSG00000030224, ENSMUSG00000025580, ENSMUSG00000020340,…	1757	170	7720	1.60246	0.0169583	0.000899793	0.0788352
mmu01100:Metabolic pathways	345	8.25952	6.69483e-05	ENSMUSG00000034570, ENSMUSG00000062646, ENSMUSG00000037916, ENSMUSG00000050856, ENSMUSG00000031783, ENSMUSG00000058076, ENSMUSG00000003072, ENSMUSG00000016194, ENSMUSG00000039176, ENSMUSG00000090035, ENSMUSG00000061518, ENSMUSG00000006057, ENSMUSG00000022956, ENSMUSG00000026192, ENSMUSG00000047250, ENSMUSG00000021263, ENSMUSG00000042032, ENSMUSG00000021123, ENSMUSG00000072949, ENSMUSG00000027452,…	1757	1278	7720	1.18613	0.019097	0.000963623	0.0888695
mmu00240:Pyrimidine metabolism	42	1.00551	7.02529e-05	ENSMUSG00000022476, ENSMUSG00000027203, ENSMUSG00000020471, ENSMUSG00000031783, ENSMUSG00000025574, ENSMUSG00000013629, ENSMUSG00000041608, ENSMUSG00000031562, ENSMUSG00000042462, ENSMUSG00000032420, ENSMUSG00000026134, ENSMUSG00000020638, ENSMUSG00000049553, ENSMUSG00000030042, ENSMUSG00000021871, ENSMUSG00000007080, ENSMUSG00000038644, ENSMUSG00000032478, ENSMUSG00000030726, ENSMUSG00000035824,…	1757	103	7720	1.79167	0.0200302	0.000963038	0.0932543
mmu05212:Pancreatic cancer	30	0.718219	7.33213e-05	ENSMUSG00000000441, ENSMUSG00000007613, ENSMUSG00000070348, ENSMUSG00000026821, ENSMUSG00000002603, ENSMUSG00000001127, ENSMUSG00000026104, ENSMUSG00000002413, ENSMUSG00000028698, ENSMUSG00000023951, ENSMUSG00000032440, ENSMUSG00000032402, ENSMUSG00000062312, ENSMUSG00000004056, ENSMUSG00000059552, ENSMUSG00000032462, ENSMUSG00000063065, ENSMUSG00000027490, ENSMUSG00000028914, ENSMUSG00000018983,…	1757	65	7720	2.02793	0.0208959	0.000959417	0.0973255
mmu04914:Progesterone-mediated oocyte maturation	37	0.885803	7.43145e-05	ENSMUSG00000000441, ENSMUSG00000020053, ENSMUSG00000029472, ENSMUSG00000019942, ENSMUSG00000001127, ENSMUSG00000002413, ENSMUSG00000028698, ENSMUSG00000005533, ENSMUSG00000022220, ENSMUSG00000029003, ENSMUSG00000038416, ENSMUSG00000032218, ENSMUSG00000014355, ENSMUSG00000004056, ENSMUSG00000032462, ENSMUSG00000020654, ENSMUSG00000063065, ENSMUSG00000030867, ENSMUSG00000027379, ENSMUSG00000027665,…	1757	87	7720	1.86865	0.0211759	0.000930148	0.0986432
mmu04141:Protein processing in endoplasmic reticulum	61	1.46038	7.94525e-05	ENSMUSG00000029613, ENSMUSG00000039530, ENSMUSG00000025823, ENSMUSG00000030298, ENSMUSG00000026942, ENSMUSG00000039234, ENSMUSG00000091971, ENSMUSG00000027455, ENSMUSG00000025408, ENSMUSG00000030082, ENSMUSG00000019927, ENSMUSG00000025757, ENSMUSG00000020571, ENSMUSG00000030062, ENSMUSG00000032116, ENSMUSG00000042406, ENSMUSG00000032115, ENSMUSG00000051984, ENSMUSG00000021116, ENSMUSG00000035325,…	1757	168	7720	1.59539	0.0226234	0.000953014	0.10546
mmu05144:Malaria	24	0.574575	0.000106668	ENSMUSG00000039005, ENSMUSG00000040249, ENSMUSG00000030830, ENSMUSG00000002944, ENSMUSG00000027398, ENSMUSG00000024401, ENSMUSG00000032508, ENSMUSG00000028047, ENSMUSG00000040152, ENSMUSG00000002603, ENSMUSG00000028864, ENSMUSG00000037405, ENSMUSG00000021702, ENSMUSG00000027995, ENSMUSG00000000290, ENSMUSG00000009376, ENSMUSG00000017652, ENSMUSG00000025746, ENSMUSG00000027962, ENSMUSG00000038067,…	1757	48	7720	2.19693	0.0302549	0.00122812	0.14156
mmu03460:Fanconi anemia pathway	25	0.598516	0.000108775	ENSMUSG00000034329, ENSMUSG00000028884, ENSMUSG00000030528, ENSMUSG00000023953, ENSMUSG00000079109, ENSMUSG00000034023, ENSMUSG00000017146, ENSMUSG00000047757, ENSMUSG00000039055, ENSMUSG00000021668, ENSMUSG00000028560, ENSMUSG00000032815, ENSMUSG00000037991, ENSMUSG00000032498, ENSMUSG00000019841, ENSMUSG00000000751, ENSMUSG00000026429, ENSMUSG00000039187, ENSMUSG00000059772, ENSMUSG00000028453,…	1757	51	7720	2.15385	0.0308433	0.00120423	0.144355
mmu05010:Alzheimer's disease	63	1.50826	0.000115768	ENSMUSG00000037916, ENSMUSG00000020022, ENSMUSG00000024778, ENSMUSG00000058076, ENSMUSG00000003072, ENSMUSG00000018770, ENSMUSG00000061518, ENSMUSG00000006057, ENSMUSG00000024639, ENSMUSG00000030785, ENSMUSG00000032086, ENSMUSG00000000171, ENSMUSG00000022956, ENSMUSG00000044894, ENSMUSG00000036438, ENSMUSG00000021764, ENSMUSG00000059534, ENSMUSG00000025651, ENSMUSG00000052593, ENSMUSG00000040249,…	1757	177	7720	1.56391	0.0327934	0.00123417	0.153628
mmu05152:Tuberculosis	62	1.48432	0.000183555	ENSMUSG00000000441, ENSMUSG00000055994, ENSMUSG00000032508, ENSMUSG00000007891, ENSMUSG00000002603, ENSMUSG00000079477, ENSMUSG00000079547, ENSMUSG00000019173, ENSMUSG00000016534, ENSMUSG00000018819, ENSMUSG00000030786, ENSMUSG00000036438, ENSMUSG00000030789, ENSMUSG00000032688, ENSMUSG00000028238, ENSMUSG00000026928, ENSMUSG00000024789, ENSMUSG00000027398, ENSMUSG00000061878, ENSMUSG00000028161,…	1757	176	7720	1.54783	0.0514954	0.00188638	0.243483
mmu04621:NOD-like receptor signaling pathway	26	0.622456	0.000224379	ENSMUSG00000021709, ENSMUSG00000055994, ENSMUSG00000024401, ENSMUSG00000019850, ENSMUSG00000071203, ENSMUSG00000035042, ENSMUSG00000032322, ENSMUSG00000063065, ENSMUSG00000039217, ENSMUSG00000030793, ENSMUSG00000021025, ENSMUSG00000070390, ENSMUSG00000026928, ENSMUSG00000027398, ENSMUSG00000022534, ENSMUSG00000031537, ENSMUSG00000030595, ENSMUSG00000023944, ENSMUSG00000032691, ENSMUSG00000078942,…	1757	56	7720	2.04	0.0625843	0.00222609	0.297561
mmu03420:Nucleotide excision repair	22	0.526694	0.00022676	ENSMUSG00000038644, ENSMUSG00000007080, ENSMUSG00000054051, ENSMUSG00000030726, ENSMUSG00000020471, ENSMUSG00000028426, ENSMUSG00000024854, ENSMUSG00000028884, ENSMUSG00000000751, ENSMUSG00000024740, ENSMUSG00000003813, ENSMUSG00000022881, ENSMUSG00000027342, ENSMUSG00000056394, ENSMUSG00000023104, ENSMUSG00000033970, ENSMUSG00000028394, ENSMUSG00000020974, ENSMUSG00000030094, ENSMUSG00000029191,…	1757	44	7720	2.19693	0.063227	0.00217478	0.300714
mmu05220:Chronic myeloid leukemia	31	0.742159	0.000250036	ENSMUSG00000000441, ENSMUSG00000009681, ENSMUSG00000007613, ENSMUSG00000003031, ENSMUSG00000070348, ENSMUSG00000020919, ENSMUSG00000002603, ENSMUSG00000001127, ENSMUSG00000002413, ENSMUSG00000028698, ENSMUSG00000043733, ENSMUSG00000032440, ENSMUSG00000022952, ENSMUSG00000004056, ENSMUSG00000059552, ENSMUSG00000032462, ENSMUSG00000063065, ENSMUSG00000004508, ENSMUSG00000021025, ENSMUSG00000027490,…	1757	72	7720	1.8918	0.0694871	0.00232051	0.331534
mmu05205:Proteoglycans in cancer	69	1.6519	0.000254462	ENSMUSG00000000441, ENSMUSG00000020170, ENSMUSG00000021109, ENSMUSG00000024778, ENSMUSG00000002603, ENSMUSG00000031714, ENSMUSG00000001127, ENSMUSG00000004266, ENSMUSG00000055723, ENSMUSG00000002413, ENSMUSG00000029580, ENSMUSG00000043733, ENSMUSG00000021822, ENSMUSG00000026193, ENSMUSG00000017009, ENSMUSG00000006932, ENSMUSG00000024290, ENSMUSG00000030536, ENSMUSG00000022831, ENSMUSG00000036904,…	1757	203	7720	1.49348	0.0706729	0.00228783	0.337394
mmu05162:Measles	50	1.19703	0.000274476	ENSMUSG00000042349, ENSMUSG00000029613, ENSMUSG00000003031, ENSMUSG00000032508, ENSMUSG00000024778, ENSMUSG00000091971, ENSMUSG00000037523, ENSMUSG00000021116, ENSMUSG00000021025, ENSMUSG00000024789, ENSMUSG00000027398, ENSMUSG00000020115, ENSMUSG00000027399, ENSMUSG00000006728, ENSMUSG00000022967, ENSMUSG00000000184, ENSMUSG00000025746, ENSMUSG00000090877, ENSMUSG00000004040, ENSMUSG00000025358,…	1757	136	7720	1.61539	0.0760153	0.00239288	0.363885
mmu05200:Pathways in cancer	120	2.87288	0.000373847	ENSMUSG00000031503, ENSMUSG00000021109, ENSMUSG00000024778, ENSMUSG00000001127, ENSMUSG00000024639, ENSMUSG00000026942, ENSMUSG00000032440, ENSMUSG00000028645, ENSMUSG00000062248, ENSMUSG00000039942, ENSMUSG00000022952, ENSMUSG00000026193, ENSMUSG00000026430, ENSMUSG00000024151, ENSMUSG00000027111, ENSMUSG00000006728, ENSMUSG00000031659, ENSMUSG00000004791, ENSMUSG00000059326, ENSMUSG00000021277,…	1757	397	7720	1.32812	0.102092	0.00316229	0.495324
mmu05210:Colorectal cancer	28	0.670338	0.000395828	ENSMUSG00000000441, ENSMUSG00000007613, ENSMUSG00000005370, ENSMUSG00000070348, ENSMUSG00000026821, ENSMUSG00000000782, ENSMUSG00000002603, ENSMUSG00000001127, ENSMUSG00000002413, ENSMUSG00000028698, ENSMUSG00000032440, ENSMUSG00000032402, ENSMUSG00000005871, ENSMUSG00000004056, ENSMUSG00000059552, ENSMUSG00000024985, ENSMUSG00000032498, ENSMUSG00000032462, ENSMUSG00000024151, ENSMUSG00000063065,…	1757	64	7720	1.92231	0.107761	0.00325244	0.524377
mmu04070:Phosphatidylinositol signaling system	38	0.909744	0.000425333	ENSMUSG00000034570, ENSMUSG00000025949, ENSMUSG00000026737, ENSMUSG00000022861, ENSMUSG00000028698, ENSMUSG00000024525, ENSMUSG00000050965, ENSMUSG00000030660, ENSMUSG00000036438, ENSMUSG00000035953, ENSMUSG00000022973, ENSMUSG00000027296, ENSMUSG00000058793, ENSMUSG00000010660, ENSMUSG00000032462, ENSMUSG00000025178, ENSMUSG00000013663, ENSMUSG00000032594, ENSMUSG00000004815, ENSMUSG00000029186,…	1757	97	7720	1.7213	0.115314	0.0033976	0.563362
mmu04142:Lysosome	45	1.07733	0.000537985	ENSMUSG00000005949, ENSMUSG00000002103, ENSMUSG00000019302, ENSMUSG00000022453, ENSMUSG00000007891, ENSMUSG00000026944, ENSMUSG00000016534, ENSMUSG00000004849, ENSMUSG00000030560, ENSMUSG00000020740, ENSMUSG00000026177, ENSMUSG00000017760, ENSMUSG00000022620, ENSMUSG00000023830, ENSMUSG00000031903, ENSMUSG00000028581, ENSMUSG00000016256, ENSMUSG00000028238, ENSMUSG00000038642, ENSMUSG00000000594,…	1757	122	7720	1.62068	0.143569	0.00417992	0.712078
mmu04722:Neurotrophin signaling pathway	45	1.07733	0.000537985	ENSMUSG00000000441, ENSMUSG00000020227, ENSMUSG00000020170, ENSMUSG00000059883, ENSMUSG00000048756, ENSMUSG00000058638, ENSMUSG00000030733, ENSMUSG00000036333, ENSMUSG00000020849, ENSMUSG00000031714, ENSMUSG00000042594, ENSMUSG00000002413, ENSMUSG00000028698, ENSMUSG00000071369, ENSMUSG00000021514, ENSMUSG00000043733, ENSMUSG00000010609, ENSMUSG00000039844, ENSMUSG00000036438, ENSMUSG00000038128,…	1757	122	7720	1.62068	0.143569	0.00417992	0.712078
mmu05219:Bladder cancer	20	0.478813	0.000710774	ENSMUSG00000000441, ENSMUSG00000027490, ENSMUSG00000070348, ENSMUSG00000018983, ENSMUSG00000040152, ENSMUSG00000006728, ENSMUSG00000021559, ENSMUSG00000027646, ENSMUSG00000001127, ENSMUSG00000020184, ENSMUSG00000002413, ENSMUSG00000000303, ENSMUSG00000023951, ENSMUSG00000024486, ENSMUSG00000062312, ENSMUSG00000017737, ENSMUSG00000025499, ENSMUSG00000059552, ENSMUSG00000016477, ENSMUSG00000063065	1757	41	7720	2.14334	0.18517	0.00537434	0.939786
mmu04066:HIF-1 signaling pathway	39	0.933684	0.000944802	ENSMUSG00000025877, ENSMUSG00000033933, ENSMUSG00000003031, ENSMUSG00000021109, ENSMUSG00000020053, ENSMUSG00000027947, ENSMUSG00000020190, ENSMUSG00000028156, ENSMUSG00000005534, ENSMUSG00000021367, ENSMUSG00000028698, ENSMUSG00000005533, ENSMUSG00000055839, ENSMUSG00000023951, ENSMUSG00000028708, ENSMUSG00000050965, ENSMUSG00000028645, ENSMUSG00000022521, ENSMUSG00000062312, ENSMUSG00000020009,…	1757	104	7720	1.64769	0.238322	0.00695599	1.24743
mmu05168:Herpes simplex infection	68	1.62796	0.000947176	ENSMUSG00000042349, ENSMUSG00000029613, ENSMUSG00000032508, ENSMUSG00000024778, ENSMUSG00000079547, ENSMUSG00000016283, ENSMUSG00000026942, ENSMUSG00000037523, ENSMUSG00000040681, ENSMUSG00000043733, ENSMUSG00000029238, ENSMUSG00000001128, ENSMUSG00000035042, ENSMUSG00000079339, ENSMUSG00000021116, ENSMUSG00000021025, ENSMUSG00000024789, ENSMUSG00000020115, ENSMUSG00000027398, ENSMUSG00000026875,…	1757	208	7720	1.43645	0.238843	0.00679968	1.25054
mmu05213:Endometrial cancer	23	0.550634	0.00127495	ENSMUSG00000000441, ENSMUSG00000006932, ENSMUSG00000048756, ENSMUSG00000070348, ENSMUSG00000028914, ENSMUSG00000027665, ENSMUSG00000000782, ENSMUSG00000041417, ENSMUSG00000001127, ENSMUSG00000002413, ENSMUSG00000028698, ENSMUSG00000000303, ENSMUSG00000009406, ENSMUSG00000005871, ENSMUSG00000062312, ENSMUSG00000025499, ENSMUSG00000059552, ENSMUSG00000004056, ENSMUSG00000024985, ENSMUSG00000032498,…	1757	52	7720	1.94344	0.307481	0.00892143	1.67992
mmu04145:Phagosome	58	1.38856	0.00142186	ENSMUSG00000019210, ENSMUSG00000079477, ENSMUSG00000079547, ENSMUSG00000019173, ENSMUSG00000016283, ENSMUSG00000016534, ENSMUSG00000026390, ENSMUSG00000029580, ENSMUSG00000030786, ENSMUSG00000030082, ENSMUSG00000058672, ENSMUSG00000036103, ENSMUSG00000043091, ENSMUSG00000001525, ENSMUSG00000028238, ENSMUSG00000002944, ENSMUSG00000007458, ENSMUSG00000030162, ENSMUSG00000035770, ENSMUSG00000033628,…	1757	174	7720	1.46462	0.336208	0.00970937	1.8718
mmu05223:Non-small cell lung cancer	24	0.574575	0.00161453	ENSMUSG00000000441, ENSMUSG00000027490, ENSMUSG00000048756, ENSMUSG00000070348, ENSMUSG00000028914, ENSMUSG00000018983, ENSMUSG00000027665, ENSMUSG00000041417, ENSMUSG00000006728, ENSMUSG00000078816, ENSMUSG00000001127, ENSMUSG00000002413, ENSMUSG00000028698, ENSMUSG00000015846, ENSMUSG00000050965, ENSMUSG00000062312, ENSMUSG00000026430, ENSMUSG00000025499, ENSMUSG00000059552, ENSMUSG00000004056,…	1757	56	7720	1.88308	0.372092	0.010764	2.12294
mmu05203:Viral carcinogenesis	73	1.74767	0.00170604	ENSMUSG00000032294, ENSMUSG00000032113, ENSMUSG00000001424, ENSMUSG00000003031, ENSMUSG00000033730, ENSMUSG00000020849, ENSMUSG00000016283, ENSMUSG00000058385, ENSMUSG00000024521, ENSMUSG00000026942, ENSMUSG00000018102, ENSMUSG00000006398, ENSMUSG00000079227, ENSMUSG00000042406, ENSMUSG00000010936, ENSMUSG00000028238, ENSMUSG00000021025, ENSMUSG00000027641, ENSMUSG00000026875, ENSMUSG00000006728,…	1757	231	7720	1.38853	0.38845	0.0111141	2.242
mmu04620:Toll-like receptor signaling pathway	37	0.885803	0.00210195	ENSMUSG00000044583, ENSMUSG00000042349, ENSMUSG00000018930, ENSMUSG00000059883, ENSMUSG00000032508, ENSMUSG00000024401, ENSMUSG00000029417, ENSMUSG00000026104, ENSMUSG00000028698, ENSMUSG00000022971, ENSMUSG00000035042, ENSMUSG00000000982, ENSMUSG00000004056, ENSMUSG00000032462, ENSMUSG00000063065, ENSMUSG00000039005, ENSMUSG00000029304, ENSMUSG00000056130, ENSMUSG00000021025, ENSMUSG00000060183,…	1757	101	7720	1.60963	0.454471	0.0133764	2.75561
mmu01130:Biosynthesis of antibiotics	68	1.62796	0.0021438	ENSMUSG00000023456, ENSMUSG00000032294, ENSMUSG00000031400, ENSMUSG00000017390, ENSMUSG00000058076, ENSMUSG00000025403, ENSMUSG00000006517, ENSMUSG00000023262, ENSMUSG00000033373, ENSMUSG00000000171, ENSMUSG00000020534, ENSMUSG00000005683, ENSMUSG00000026192, ENSMUSG00000031604, ENSMUSG00000027452, ENSMUSG00000021125, ENSMUSG00000030541, ENSMUSG00000032047, ENSMUSG00000059040, ENSMUSG00000011752,…	1757	214	7720	1.39618	0.461021	0.0133466	2.80976
mmu05211:Renal cell carcinoma	27	0.646397	0.00219381	ENSMUSG00000033933, ENSMUSG00000000441, ENSMUSG00000021109, ENSMUSG00000028864, ENSMUSG00000002603, ENSMUSG00000031714, ENSMUSG00000001127, ENSMUSG00000002413, ENSMUSG00000028698, ENSMUSG00000055839, ENSMUSG00000015709, ENSMUSG00000043733, ENSMUSG00000023951, ENSMUSG00000028645, ENSMUSG00000039844, ENSMUSG00000022521, ENSMUSG00000004056, ENSMUSG00000032462, ENSMUSG00000063065, ENSMUSG00000032633,…	1757	67	7720	1.77066	0.468744	0.0133676	2.87442
mmu05202:Transcriptional misregulation in cancer	55	1.31673	0.00222765	ENSMUSG00000029178, ENSMUSG00000003031, ENSMUSG00000068457, ENSMUSG00000037992, ENSMUSG00000030786, ENSMUSG00000032440, ENSMUSG00000025408, ENSMUSG00000021822, ENSMUSG00000031681, ENSMUSG00000022952, ENSMUSG00000029648, ENSMUSG00000029086, ENSMUSG00000046519, ENSMUSG00000027315, ENSMUSG00000034041, ENSMUSG00000026875, ENSMUSG00000013089, ENSMUSG00000020184, ENSMUSG00000061589, ENSMUSG00000000184,…	1757	166	7720	1.45579	0.473907	0.0132917	2.91815
mmu01200:Carbon metabolism	41	0.981566	0.00248467	ENSMUSG00000025877, ENSMUSG00000032294, ENSMUSG00000023456, ENSMUSG00000022477, ENSMUSG00000031400, ENSMUSG00000017390, ENSMUSG00000058076, ENSMUSG00000024892, ENSMUSG00000062070, ENSMUSG00000032279, ENSMUSG00000025403, ENSMUSG00000028980, ENSMUSG00000000171, ENSMUSG00000020534, ENSMUSG00000025465, ENSMUSG00000005683, ENSMUSG00000027452, ENSMUSG00000030541, ENSMUSG00000032047, ENSMUSG00000059040,…	1757	116	7720	1.553	0.51153	0.0145156	3.24973
mmu04630:Jak-STAT signaling pathway	49	1.17309	0.0025697	ENSMUSG00000018341, ENSMUSG00000002147, ENSMUSG00000004266, ENSMUSG00000017057, ENSMUSG00000043733, ENSMUSG00000024014, ENSMUSG00000000791, ENSMUSG00000049093, ENSMUSG00000024789, ENSMUSG00000030748, ENSMUSG00000074695, ENSMUSG00000044244, ENSMUSG00000022967, ENSMUSG00000059326, ENSMUSG00000038037, ENSMUSG00000000184, ENSMUSG00000025746, ENSMUSG00000048379, ENSMUSG00000033467, ENSMUSG00000007659,…	1757	145	7720	1.48482	0.523376	0.0147112	3.35919
mmu01230:Biosynthesis of amino acids	30	0.718219	0.0026931	ENSMUSG00000032294, ENSMUSG00000023456, ENSMUSG00000022477, ENSMUSG00000017390, ENSMUSG00000024892, ENSMUSG00000062070, ENSMUSG00000022571, ENSMUSG00000032279, ENSMUSG00000023262, ENSMUSG00000025403, ENSMUSG00000020534, ENSMUSG00000005683, ENSMUSG00000042032, ENSMUSG00000021125, ENSMUSG00000076441, ENSMUSG00000030541, ENSMUSG00000059040, ENSMUSG00000011752, ENSMUSG00000053398, ENSMUSG00000053644,…	1757	78	7720	1.68994	0.540059	0.0151132	3.51784
mmu04120:Ubiquitin mediated proteolysis	48	1.14915	0.00284106	ENSMUSG00000033933, ENSMUSG00000024589, ENSMUSG00000032307, ENSMUSG00000060860, ENSMUSG00000038965, ENSMUSG00000024740, ENSMUSG00000029472, ENSMUSG00000039615, ENSMUSG00000017146, ENSMUSG00000036986, ENSMUSG00000055839, ENSMUSG00000070923, ENSMUSG00000038416, ENSMUSG00000027078, ENSMUSG00000019927, ENSMUSG00000018363, ENSMUSG00000001403, ENSMUSG00000014355, ENSMUSG00000006398, ENSMUSG00000053113,…	1757	142	7720	1.48525	0.559299	0.015634	3.70776
mmu00230:Purine metabolism	58	1.38856	0.00293053	ENSMUSG00000032294, ENSMUSG00000020471, ENSMUSG00000031783, ENSMUSG00000022220, ENSMUSG00000011148, ENSMUSG00000026192, ENSMUSG00000037370, ENSMUSG00000021871, ENSMUSG00000032478, ENSMUSG00000024854, ENSMUSG00000074797, ENSMUSG00000022962, ENSMUSG00000022292, ENSMUSG00000000776, ENSMUSG00000031659, ENSMUSG00000022407, ENSMUSG00000023961, ENSMUSG00000029366, ENSMUSG00000030671, ENSMUSG00000025395,…	1757	179	7720	1.42371	0.570543	0.0158213	3.82244
mmu04114:Oocyte meiosis	39	0.933684	0.003033	ENSMUSG00000019773, ENSMUSG00000020053, ENSMUSG00000020849, ENSMUSG00000019942, ENSMUSG00000029472, ENSMUSG00000005533, ENSMUSG00000007564, ENSMUSG00000022220, ENSMUSG00000029003, ENSMUSG00000038416, ENSMUSG00000036438, ENSMUSG00000051391, ENSMUSG00000017843, ENSMUSG00000014355, ENSMUSG00000006398, ENSMUSG00000020654, ENSMUSG00000063065, ENSMUSG00000028212, ENSMUSG00000030867, ENSMUSG00000027496,…	1757	110	7720	1.55782	0.583068	0.0160701	3.95361
mmu04520:Adherens junction	28	0.670338	0.00323142	ENSMUSG00000007613, ENSMUSG00000000782, ENSMUSG00000004266, ENSMUSG00000005534, ENSMUSG00000034101, ENSMUSG00000005533, ENSMUSG00000029580, ENSMUSG00000032440, ENSMUSG00000032402, ENSMUSG00000021823, ENSMUSG00000022521, ENSMUSG00000062312, ENSMUSG00000024985, ENSMUSG00000063065, ENSMUSG00000006932, ENSMUSG00000025314, ENSMUSG00000030536, ENSMUSG00000019843, ENSMUSG00000027646, ENSMUSG00000009376,…	1757	72	7720	1.70872	0.606296	0.0168055	4.20714
mmu05169:Epstein-Barr virus infection	67	1.60402	0.00390125	ENSMUSG00000026914, ENSMUSG00000029613, ENSMUSG00000001424, ENSMUSG00000030830, ENSMUSG00000002102, ENSMUSG00000003031, ENSMUSG00000029430, ENSMUSG00000031783, ENSMUSG00000020849, ENSMUSG00000016283, ENSMUSG00000026942, ENSMUSG00000091971, ENSMUSG00000026229, ENSMUSG00000025487, ENSMUSG00000020941, ENSMUSG00000021025, ENSMUSG00000029084, ENSMUSG00000020115, ENSMUSG00000026875, ENSMUSG00000002625,…	1757	215	7720	1.36925	0.675593	0.0199021	5.05849
mmu04650:Natural killer cell mediated cytotoxicity	37	0.885803	0.00442909	ENSMUSG00000000441, ENSMUSG00000030830, ENSMUSG00000002699, ENSMUSG00000024401, ENSMUSG00000024778, ENSMUSG00000078452, ENSMUSG00000004266, ENSMUSG00000001127, ENSMUSG00000002413, ENSMUSG00000028698, ENSMUSG00000009621, ENSMUSG00000043733, ENSMUSG00000050965, ENSMUSG00000022971, ENSMUSG00000015355, ENSMUSG00000020009, ENSMUSG00000032462, ENSMUSG00000063065, ENSMUSG00000004709, ENSMUSG00000053219,…	1757	105	7720	1.54831	0.721521	0.0221786	5.72444
mmu04666:Fc gamma R-mediated phagocytosis	31	0.742159	0.00459713	ENSMUSG00000000441, ENSMUSG00000026656, ENSMUSG00000026395, ENSMUSG00000028517, ENSMUSG00000027695, ENSMUSG00000028698, ENSMUSG00000009621, ENSMUSG00000050965, ENSMUSG00000021948, ENSMUSG00000004056, ENSMUSG00000047945, ENSMUSG00000020143, ENSMUSG00000032462, ENSMUSG00000069662, ENSMUSG00000063065, ENSMUSG00000004508, ENSMUSG00000021759, ENSMUSG00000034116, ENSMUSG00000061878, ENSMUSG00000027665,…	1757	84	7720	1.62154	0.734735	0.02262	5.93553
mmu04210:Apoptosis	24	0.574575	0.00461034	ENSMUSG00000020941, ENSMUSG00000021025, ENSMUSG00000004446, ENSMUSG00000025076, ENSMUSG00000028914, ENSMUSG00000024401, ENSMUSG00000027665, ENSMUSG00000024778, ENSMUSG00000071714, ENSMUSG00000003873, ENSMUSG00000041417, ENSMUSG00000071713, ENSMUSG00000031537, ENSMUSG00000027997, ENSMUSG00000026942, ENSMUSG00000028698, ENSMUSG00000026031, ENSMUSG00000007659, ENSMUSG00000039304, ENSMUSG00000059552,…	1757	60	7720	1.75754	0.735747	0.0223042	5.9521
mmu03440:Homologous recombination	14	0.335169	0.00478741	ENSMUSG00000038644, ENSMUSG00000030726, ENSMUSG00000020471, ENSMUSG00000024854, ENSMUSG00000028884, ENSMUSG00000000751, ENSMUSG00000030528, ENSMUSG00000028702, ENSMUSG00000078773, ENSMUSG00000031928, ENSMUSG00000041147, ENSMUSG00000039055, ENSMUSG00000027323, ENSMUSG00000028933	1757	28	7720	2.19693	0.748946	0.0227715	6.17404
mmu05145:Toxoplasmosis	39	0.933684	0.00509792	ENSMUSG00000059883, ENSMUSG00000037649, ENSMUSG00000046879, ENSMUSG00000032508, ENSMUSG00000024401, ENSMUSG00000002603, ENSMUSG00000079547, ENSMUSG00000037548, ENSMUSG00000025701, ENSMUSG00000026104, ENSMUSG00000028698, ENSMUSG00000091971, ENSMUSG00000020009, ENSMUSG00000004056, ENSMUSG00000079227, ENSMUSG00000021868, ENSMUSG00000032462, ENSMUSG00000063065, ENSMUSG00000027111, ENSMUSG00000039005,…	1757	113	7720	1.51646	0.770524	0.0238416	6.56205
mmu04920:Adipocytokine signaling pathway	27	0.646397	0.00680114	ENSMUSG00000018796, ENSMUSG00000020785, ENSMUSG00000024401, ENSMUSG00000029471, ENSMUSG00000026942, ENSMUSG00000043733, ENSMUSG00000024900, ENSMUSG00000015846, ENSMUSG00000028645, ENSMUSG00000040618, ENSMUSG00000024981, ENSMUSG00000004056, ENSMUSG00000053113, ENSMUSG00000028944, ENSMUSG00000026457, ENSMUSG00000031278, ENSMUSG00000021025, ENSMUSG00000024789, ENSMUSG00000002944, ENSMUSG00000023947,…	1757	72	7720	1.64769	0.859903	0.0312031	8.66411
mmu00310:Lysine degradation	21	0.502753	0.00763542	ENSMUSG00000002028, ENSMUSG00000003809, ENSMUSG00000028053, ENSMUSG00000034807, ENSMUSG00000045098, ENSMUSG00000049327, ENSMUSG00000006307, ENSMUSG00000057406, ENSMUSG00000038384, ENSMUSG00000059851, ENSMUSG00000053644, ENSMUSG00000037111, ENSMUSG00000061589, ENSMUSG00000048154, ENSMUSG00000020359, ENSMUSG00000054823, ENSMUSG00000029004, ENSMUSG00000039231, ENSMUSG00000025465, ENSMUSG00000038056,…	1757	52	7720	1.77444	0.890018	0.034432	9.67772
mmu05221:Acute myeloid leukemia	22	0.526694	0.00883927	ENSMUSG00000000441, ENSMUSG00000070348, ENSMUSG00000027665, ENSMUSG00000000782, ENSMUSG00000020919, ENSMUSG00000041417, ENSMUSG00000031537, ENSMUSG00000001127, ENSMUSG00000002413, ENSMUSG00000036986, ENSMUSG00000034957, ENSMUSG00000028698, ENSMUSG00000037992, ENSMUSG00000024014, ENSMUSG00000022952, ENSMUSG00000004040, ENSMUSG00000025499, ENSMUSG00000004056, ENSMUSG00000024985, ENSMUSG00000004043,…	1757	56	7720	1.72616	0.922465	0.0391659	11.122
mmu05222:Small cell lung cancer	30	0.718219	0.00899744	ENSMUSG00000070348, ENSMUSG00000031503, ENSMUSG00000028698, ENSMUSG00000026942, ENSMUSG00000015846, ENSMUSG00000062248, ENSMUSG00000026193, ENSMUSG00000004056, ENSMUSG00000059552, ENSMUSG00000032462, ENSMUSG00000032487, ENSMUSG00000027111, ENSMUSG00000013663, ENSMUSG00000028212, ENSMUSG00000021025, ENSMUSG00000028044, ENSMUSG00000027490, ENSMUSG00000028914, ENSMUSG00000018983, ENSMUSG00000027665,…	1757	84	7720	1.56923	0.925948	0.0392548	11.3102
mmu00562:Inositol phosphate metabolism	26	0.622456	0.00920255	ENSMUSG00000034570, ENSMUSG00000023456, ENSMUSG00000029186, ENSMUSG00000026925, ENSMUSG00000024896, ENSMUSG00000025949, ENSMUSG00000027665, ENSMUSG00000026737, ENSMUSG00000033628, ENSMUSG00000026113, ENSMUSG00000060733, ENSMUSG00000019139, ENSMUSG00000001173, ENSMUSG00000024525, ENSMUSG00000040061, ENSMUSG00000030660, ENSMUSG00000022973, ENSMUSG00000027296, ENSMUSG00000034902, ENSMUSG00000030269,…	1757	70	7720	1.632	0.930234	0.0395396	11.5536
mmu05142:Chagas disease (American trypanosomiasis)	35	0.837922	0.0106126	ENSMUSG00000007613, ENSMUSG00000059883, ENSMUSG00000032508, ENSMUSG00000024401, ENSMUSG00000024778, ENSMUSG00000002603, ENSMUSG00000003814, ENSMUSG00000024639, ENSMUSG00000028698, ENSMUSG00000007564, ENSMUSG00000026031, ENSMUSG00000032440, ENSMUSG00000032402, ENSMUSG00000035042, ENSMUSG00000000982, ENSMUSG00000020009, ENSMUSG00000004056, ENSMUSG00000032462, ENSMUSG00000063065, ENSMUSG00000039005,…	1757	103	7720	1.49306	0.953707	0.0448263	13.2107
mmu05230:Central carbon metabolism in cancer	24	0.574575	0.0112346	ENSMUSG00000000441, ENSMUSG00000025877, ENSMUSG00000032294, ENSMUSG00000011752, ENSMUSG00000031400, ENSMUSG00000000628, ENSMUSG00000021109, ENSMUSG00000027665, ENSMUSG00000041417, ENSMUSG00000026103, ENSMUSG00000040010, ENSMUSG00000009376, ENSMUSG00000028698, ENSMUSG00000020277, ENSMUSG00000028645, ENSMUSG00000062312, ENSMUSG00000025499, ENSMUSG00000059552, ENSMUSG00000001918, ENSMUSG00000004056,…	1757	64	7720	1.64769	0.961376	0.0467243	13.9324
mmu04060:Cytokine-cytokine receptor interaction	72	1.72373	0.0125708	ENSMUSG00000025929, ENSMUSG00000007613, ENSMUSG00000048480, ENSMUSG00000018341, ENSMUSG00000024778, ENSMUSG00000002603, ENSMUSG00000017057, ENSMUSG00000028019, ENSMUSG00000035678, ENSMUSG00000032440, ENSMUSG00000035373, ENSMUSG00000035042, ENSMUSG00000000982, ENSMUSG00000050395, ENSMUSG00000029648, ENSMUSG00000079227, ENSMUSG00000000791, ENSMUSG00000029373, ENSMUSG00000049093, ENSMUSG00000067336,…	1757	245	7720	1.29125	0.973835	0.0514322	15.4643
mmu04710:Circadian rhythm	14	0.335169	0.013273	ENSMUSG00000025958, ENSMUSG00000022433, ENSMUSG00000055116, ENSMUSG00000022124, ENSMUSG00000030103, ENSMUSG00000020889, ENSMUSG00000055866, ENSMUSG00000029238, ENSMUSG00000038205, ENSMUSG00000020271, ENSMUSG00000032238, ENSMUSG00000020038, ENSMUSG00000030256, ENSMUSG00000028944	1757	31	7720	1.98432	0.978682	0.0534908	16.2592
mmu05214:Glioma	24	0.574575	0.0137358	ENSMUSG00000000441, ENSMUSG00000027490, ENSMUSG00000070348, ENSMUSG00000018983, ENSMUSG00000020053, ENSMUSG00000027665, ENSMUSG00000041417, ENSMUSG00000006728, ENSMUSG00000078816, ENSMUSG00000001127, ENSMUSG00000020184, ENSMUSG00000002413, ENSMUSG00000005533, ENSMUSG00000028698, ENSMUSG00000050965, ENSMUSG00000036438, ENSMUSG00000025499, ENSMUSG00000059552, ENSMUSG00000004056, ENSMUSG00000016477,…	1757	65	7720	1.62235	0.981376	0.0545584	16.7792
mmu04062:Chemokine signaling pathway	59	1.4125	0.01468	ENSMUSG00000000441, ENSMUSG00000029380, ENSMUSG00000048480, ENSMUSG00000031780, ENSMUSG00000003228, ENSMUSG00000048756, ENSMUSG00000002413, ENSMUSG00000022220, ENSMUSG00000009621, ENSMUSG00000035373, ENSMUSG00000035042, ENSMUSG00000000982, ENSMUSG00000029379, ENSMUSG00000079227, ENSMUSG00000029373, ENSMUSG00000021025, ENSMUSG00000060216, ENSMUSG00000024789, ENSMUSG00000018920, ENSMUSG00000024290,…	1757	196	7720	1.32264	0.985866	0.0574395	17.831
mmu00670:One carbon pool by folate	10	0.239406	0.0156397	ENSMUSG00000020534, ENSMUSG00000025747, ENSMUSG00000021707, ENSMUSG00000026192, ENSMUSG00000005667, ENSMUSG00000022962, ENSMUSG00000040675, ENSMUSG00000021048, ENSMUSG00000030088, ENSMUSG00000025403	1757	19	7720	2.31255	0.989325	0.060295	18.8875
mmu04670:Leukocyte transendothelial migration	39	0.933684	0.0169724	ENSMUSG00000030830, ENSMUSG00000034101, ENSMUSG00000028698, ENSMUSG00000034868, ENSMUSG00000009621, ENSMUSG00000029580, ENSMUSG00000043733, ENSMUSG00000030786, ENSMUSG00000021823, ENSMUSG00000050965, ENSMUSG00000027962, ENSMUSG00000026430, ENSMUSG00000032462, ENSMUSG00000055976, ENSMUSG00000006932, ENSMUSG00000034116, ENSMUSG00000027665, ENSMUSG00000024290, ENSMUSG00000035133, ENSMUSG00000027009,…	1757	121	7720	1.4162	0.992773	0.0644508	20.3338
mmu04662:B cell receptor signaling pathway	25	0.598516	0.0180614	ENSMUSG00000000441, ENSMUSG00000021025, ENSMUSG00000028159, ENSMUSG00000034116, ENSMUSG00000026656, ENSMUSG00000027665, ENSMUSG00000028161, ENSMUSG00000030577, ENSMUSG00000023947, ENSMUSG00000041417, ENSMUSG00000030595, ENSMUSG00000031537, ENSMUSG00000004266, ENSMUSG00000028698, ENSMUSG00000022092, ENSMUSG00000009621, ENSMUSG00000061132, ENSMUSG00000036526, ENSMUSG00000032688, ENSMUSG00000025499,…	1757	70	7720	1.56923	0.994748	0.0675967	21.4979
mmu05133:Pertussis	26	0.622456	0.0194084	ENSMUSG00000059883, ENSMUSG00000024401, ENSMUSG00000032508, ENSMUSG00000030786, ENSMUSG00000036438, ENSMUSG00000023224, ENSMUSG00000063065, ENSMUSG00000030793, ENSMUSG00000039005, ENSMUSG00000056130, ENSMUSG00000025076, ENSMUSG00000027398, ENSMUSG00000027399, ENSMUSG00000000290, ENSMUSG00000032691, ENSMUSG00000020826, ENSMUSG00000025746, ENSMUSG00000055172, ENSMUSG00000038058, ENSMUSG00000003184,…	1757	74	7720	1.54379	0.996463	0.0715796	22.9159
mmu05012:Parkinson's disease	46	1.10127	0.0204828	ENSMUSG00000037916, ENSMUSG00000036273, ENSMUSG00000038965, ENSMUSG00000020022, ENSMUSG00000029632, ENSMUSG00000028964, ENSMUSG00000058076, ENSMUSG00000024248, ENSMUSG00000035885, ENSMUSG00000003072, ENSMUSG00000020178, ENSMUSG00000018770, ENSMUSG00000061518, ENSMUSG00000006057, ENSMUSG00000000563, ENSMUSG00000030785, ENSMUSG00000022956, ENSMUSG00000000171, ENSMUSG00000041697, ENSMUSG00000044894,…	1757	149	7720	1.35649	0.997421	0.0744863	24.03
mmu05132:Salmonella infection	27	0.646397	0.0206993	ENSMUSG00000029380, ENSMUSG00000018930, ENSMUSG00000018293, ENSMUSG00000032508, ENSMUSG00000079477, ENSMUSG00000029580, ENSMUSG00000029379, ENSMUSG00000000982, ENSMUSG00000020009, ENSMUSG00000021288, ENSMUSG00000063065, ENSMUSG00000039217, ENSMUSG00000030793, ENSMUSG00000039005, ENSMUSG00000003546, ENSMUSG00000028917, ENSMUSG00000027398, ENSMUSG00000024290, ENSMUSG00000035770, ENSMUSG00000027399,…	1757	78	7720	1.52095	0.99758	0.0743232	24.2527
mmu03018:RNA degradation	28	0.670338	0.021933	ENSMUSG00000017264, ENSMUSG00000034575, ENSMUSG00000031683, ENSMUSG00000036478, ENSMUSG00000048546, ENSMUSG00000026174, ENSMUSG00000020515, ENSMUSG00000029647, ENSMUSG00000034321, ENSMUSG00000034724, ENSMUSG00000025980, ENSMUSG00000059040, ENSMUSG00000041477, ENSMUSG00000037573, ENSMUSG00000007050, ENSMUSG00000027714, ENSMUSG00000031848, ENSMUSG00000039356, ENSMUSG00000033166, ENSMUSG00000036779,…	1757	82	7720	1.50034	0.998317	0.0776662	25.5102
mmu05323:Rheumatoid arthritis	28	0.670338	0.021933	ENSMUSG00000025929, ENSMUSG00000030830, ENSMUSG00000019302, ENSMUSG00000037649, ENSMUSG00000024403, ENSMUSG00000019210, ENSMUSG00000024401, ENSMUSG00000002603, ENSMUSG00000079547, ENSMUSG00000037548, ENSMUSG00000023951, ENSMUSG00000014599, ENSMUSG00000035042, ENSMUSG00000000982, ENSMUSG00000029648, ENSMUSG00000039217, ENSMUSG00000039005, ENSMUSG00000028238, ENSMUSG00000027398, ENSMUSG00000027399,…	1757	82	7720	1.50034	0.998317	0.0776662	25.5102
mmu05150:Staphylococcus aureus infection	19	0.454872	0.0229122	ENSMUSG00000030830, ENSMUSG00000056529, ENSMUSG00000037649, ENSMUSG00000049130, ENSMUSG00000026656, ENSMUSG00000037405, ENSMUSG00000079547, ENSMUSG00000000290, ENSMUSG00000037548, ENSMUSG00000024334, ENSMUSG00000030786, ENSMUSG00000090231, ENSMUSG00000055172, ENSMUSG00000059498, ENSMUSG00000052270, ENSMUSG00000038521, ENSMUSG00000073418, ENSMUSG00000026365, ENSMUSG00000024164	1757	50	7720	1.66966	0.998739	0.080057	26.4945
mmu04071:Sphingolipid signaling pathway	39	0.933684	0.0250608	ENSMUSG00000000441, ENSMUSG00000024401, ENSMUSG00000007891, ENSMUSG00000021054, ENSMUSG00000027695, ENSMUSG00000024639, ENSMUSG00000071369, ENSMUSG00000028698, ENSMUSG00000026942, ENSMUSG00000023021, ENSMUSG00000007564, ENSMUSG00000019822, ENSMUSG00000050965, ENSMUSG00000021263, ENSMUSG00000017843, ENSMUSG00000004056, ENSMUSG00000059552, ENSMUSG00000032462, ENSMUSG00000063065, ENSMUSG00000013663,…	1757	124	7720	1.38194	0.999331	0.0862887	28.6123
mmu05160:Hepatitis C	42	1.00551	0.02683	ENSMUSG00000000441, ENSMUSG00000042349, ENSMUSG00000029613, ENSMUSG00000024401, ENSMUSG00000001127, ENSMUSG00000026104, ENSMUSG00000002413, ENSMUSG00000002325, ENSMUSG00000028698, ENSMUSG00000026942, ENSMUSG00000037523, ENSMUSG00000007564, ENSMUSG00000066800, ENSMUSG00000015846, ENSMUSG00000022971, ENSMUSG00000031668, ENSMUSG00000079339, ENSMUSG00000059552, ENSMUSG00000004056, ENSMUSG00000053113,…	1757	136	7720	1.35693	0.999603	0.0910993	30.3136
Gene expression, REC day 3 vs REC day 6
Term	Count	%	PValue	Genes	List Total	Pop Hits	Pop Total	Fold Enrichment	Bonferroni	Benjamini	FDR
mmu03050:Proteasome	41	1.13228	1.50132e-23	ENSMUSG00000026914, ENSMUSG00000002102, ENSMUSG00000015671, ENSMUSG00000031897, ENSMUSG00000020720, ENSMUSG00000096727, ENSMUSG00000017428, ENSMUSG00000026229, ENSMUSG00000060073, ENSMUSG00000026750, ENSMUSG00000018286, ENSMUSG00000025487, ENSMUSG00000029649, ENSMUSG00000032301, ENSMUSG00000005779, ENSMUSG00000017221, ENSMUSG00000021024, ENSMUSG00000040850, ENSMUSG00000021737, ENSMUSG00000069744,…	1518	45	7720	4.63358	4.30879e-21	4.30879e-21	1.99266e-20
mmu05168:Herpes simplex infection	83	2.29218	2.00947e-11	ENSMUSG00000042349, ENSMUSG00000040385, ENSMUSG00000032508, ENSMUSG00000024778, ENSMUSG00000024927, ENSMUSG00000052776, ENSMUSG00000026942, ENSMUSG00000037523, ENSMUSG00000040681, ENSMUSG00000043733, ENSMUSG00000040033, ENSMUSG00000029238, ENSMUSG00000060261, ENSMUSG00000035042, ENSMUSG00000026222, ENSMUSG00000002307, ENSMUSG00000079339, ENSMUSG00000006392, ENSMUSG00000021116, ENSMUSG00000046245,…	1518	208	7720	2.02937	5.76718e-09	2.88359e-09	2.66711e-08
mmu04142:Lysosome	56	1.54653	1.18415e-10	ENSMUSG00000005949, ENSMUSG00000033540, ENSMUSG00000002103, ENSMUSG00000022453, ENSMUSG00000007891, ENSMUSG00000026944, ENSMUSG00000033379, ENSMUSG00000017760, ENSMUSG00000023830, ENSMUSG00000031447, ENSMUSG00000028581, ENSMUSG00000028238, ENSMUSG00000024413, ENSMUSG00000007458, ENSMUSG00000029426, ENSMUSG00000049624, ENSMUSG00000031591, ENSMUSG00000004567, ENSMUSG00000028164, ENSMUSG00000001750,…	1518	122	7720	2.33439	3.39852e-08	1.13284e-08	1.5717e-07
mmu05169:Epstein-Barr virus infection	81	2.23695	9.68742e-10	ENSMUSG00000029478, ENSMUSG00000026914, ENSMUSG00000001424, ENSMUSG00000030830, ENSMUSG00000003031, ENSMUSG00000002102, ENSMUSG00000029430, ENSMUSG00000024927, ENSMUSG00000020849, ENSMUSG00000026942, ENSMUSG00000026229, ENSMUSG00000028800, ENSMUSG00000020573, ENSMUSG00000004864, ENSMUSG00000025487, ENSMUSG00000021025, ENSMUSG00000028874, ENSMUSG00000056116, ENSMUSG00000029084, ENSMUSG00000020115,…	1518	215	7720	1.91598	2.78029e-07	6.95072e-08	1.28578e-06
mmu05152:Tuberculosis	69	1.90555	2.95048e-09	ENSMUSG00000055994, ENSMUSG00000032508, ENSMUSG00000007891, ENSMUSG00000002603, ENSMUSG00000024927, ENSMUSG00000019173, ENSMUSG00000019370, ENSMUSG00000022504, ENSMUSG00000018819, ENSMUSG00000004864, ENSMUSG00000033379, ENSMUSG00000019979, ENSMUSG00000032688, ENSMUSG00000025383, ENSMUSG00000031447, ENSMUSG00000001175, ENSMUSG00000028238, ENSMUSG00000028680, ENSMUSG00000024789, ENSMUSG00000027398,…	1518	176	7720	1.9938	8.46787e-07	1.69357e-07	3.91609e-06
mmu05162:Measles	57	1.57415	5.11692e-09	ENSMUSG00000042349, ENSMUSG00000003031, ENSMUSG00000026770, ENSMUSG00000032508, ENSMUSG00000024778, ENSMUSG00000024927, ENSMUSG00000052776, ENSMUSG00000037523, ENSMUSG00000020573, ENSMUSG00000040033, ENSMUSG00000015316, ENSMUSG00000079316, ENSMUSG00000023341, ENSMUSG00000021116, ENSMUSG00000021025, ENSMUSG00000029605, ENSMUSG00000024789, ENSMUSG00000027398, ENSMUSG00000020115, ENSMUSG00000027399,…	1518	136	7720	2.13148	1.46856e-06	2.44759e-07	6.79155e-06
mmu05164:Influenza A	67	1.85032	5.30686e-09	ENSMUSG00000042349, ENSMUSG00000032508, ENSMUSG00000024778, ENSMUSG00000024927, ENSMUSG00000052776, ENSMUSG00000022504, ENSMUSG00000037523, ENSMUSG00000020573, ENSMUSG00000029580, ENSMUSG00000040033, ENSMUSG00000026159, ENSMUSG00000004864, ENSMUSG00000035042, ENSMUSG00000021116, ENSMUSG00000023341, ENSMUSG00000021025, ENSMUSG00000029605, ENSMUSG00000024789, ENSMUSG00000020115, ENSMUSG00000020641,…	1518	171	7720	1.99262	1.52307e-06	2.17581e-07	7.04364e-06
mmu05134:Legionellosis	32	0.883734	5.45866e-09	ENSMUSG00000029380, ENSMUSG00000025225, ENSMUSG00000020149, ENSMUSG00000024870, ENSMUSG00000024401, ENSMUSG00000032508, ENSMUSG00000024927, ENSMUSG00000078566, ENSMUSG00000031628, ENSMUSG00000051439, ENSMUSG00000019979, ENSMUSG00000029379, ENSMUSG00000030793, ENSMUSG00000039005, ENSMUSG00000021025, ENSMUSG00000025076, ENSMUSG00000027398, ENSMUSG00000028163, ENSMUSG00000027995, ENSMUSG00000004296,…	1518	57	7720	2.8551	1.56663e-06	1.95829e-07	7.24513e-06
mmu04668:TNF signaling pathway	48	1.3256	1.55261e-08	ENSMUSG00000029380, ENSMUSG00000018932, ENSMUSG00000035352, ENSMUSG00000024402, ENSMUSG00000055994, ENSMUSG00000024401, ENSMUSG00000024778, ENSMUSG00000019850, ENSMUSG00000024927, ENSMUSG00000026942, ENSMUSG00000022221, ENSMUSG00000058163, ENSMUSG00000031628, ENSMUSG00000020573, ENSMUSG00000026031, ENSMUSG00000035042, ENSMUSG00000053175, ENSMUSG00000004864, ENSMUSG00000027962, ENSMUSG00000029379,…	1518	109	7720	2.23955	4.45597e-06	4.95109e-07	2.06073e-05
mmu05133:Pertussis	36	0.9942	6.53386e-08	ENSMUSG00000024401, ENSMUSG00000032508, ENSMUSG00000024927, ENSMUSG00000019370, ENSMUSG00000031628, ENSMUSG00000004864, ENSMUSG00000051439, ENSMUSG00000041515, ENSMUSG00000025383, ENSMUSG00000063065, ENSMUSG00000030793, ENSMUSG00000039005, ENSMUSG00000001175, ENSMUSG00000056130, ENSMUSG00000025076, ENSMUSG00000027398, ENSMUSG00000027399, ENSMUSG00000036905, ENSMUSG00000028163, ENSMUSG00000004296,…	1518	74	7720	2.47409	1.8752e-05	1.87522e-06	8.67221e-05
mmu04380:Osteoclast differentiation	51	1.40845	1.38649e-07	ENSMUSG00000000440, ENSMUSG00000007613, ENSMUSG00000002699, ENSMUSG00000002603, ENSMUSG00000024927, ENSMUSG00000026942, ENSMUSG00000006519, ENSMUSG00000020573, ENSMUSG00000040033, ENSMUSG00000032440, ENSMUSG00000004864, ENSMUSG00000021025, ENSMUSG00000027398, ENSMUSG00000028161, ENSMUSG00000027399, ENSMUSG00000028163, ENSMUSG00000059089, ENSMUSG00000024912, ENSMUSG00000022967, ENSMUSG00000022092,…	1518	126	7720	2.05847	3.97914e-05	3.61746e-06	0.000184024
mmu05140:Leishmaniasis	32	0.883734	1.87317e-07	ENSMUSG00000015947, ENSMUSG00000024401, ENSMUSG00000032508, ENSMUSG00000002603, ENSMUSG00000024927, ENSMUSG00000004266, ENSMUSG00000026104, ENSMUSG00000006519, ENSMUSG00000004864, ENSMUSG00000059498, ENSMUSG00000020009, ENSMUSG00000047945, ENSMUSG00000032487, ENSMUSG00000063065, ENSMUSG00000039005, ENSMUSG00000021025, ENSMUSG00000024789, ENSMUSG00000027398, ENSMUSG00000071715, ENSMUSG00000027399,…	1518	64	7720	2.54282	5.37587e-05	4.48e-06	0.000248621
mmu05142:Chagas disease (American trypanosomiasis)	44	1.21513	1.94187e-07	ENSMUSG00000007613, ENSMUSG00000035352, ENSMUSG00000032508, ENSMUSG00000024401, ENSMUSG00000024778, ENSMUSG00000002603, ENSMUSG00000024927, ENSMUSG00000034781, ENSMUSG00000003814, ENSMUSG00000037411, ENSMUSG00000024639, ENSMUSG00000020573, ENSMUSG00000026031, ENSMUSG00000032440, ENSMUSG00000032402, ENSMUSG00000035042, ENSMUSG00000004864, ENSMUSG00000000982, ENSMUSG00000020009, ENSMUSG00000034792,…	1518	103	7720	2.17251	5.57303e-05	4.28705e-06	0.000257739
mmu04620:Toll-like receptor signaling pathway	43	1.18752	3.06323e-07	ENSMUSG00000018932, ENSMUSG00000042349, ENSMUSG00000018930, ENSMUSG00000032508, ENSMUSG00000024401, ENSMUSG00000029417, ENSMUSG00000024927, ENSMUSG00000026104, ENSMUSG00000020573, ENSMUSG00000035027, ENSMUSG00000022971, ENSMUSG00000035042, ENSMUSG00000004864, ENSMUSG00000051439, ENSMUSG00000000982, ENSMUSG00000032462, ENSMUSG00000063065, ENSMUSG00000039005, ENSMUSG00000029304, ENSMUSG00000056130,…	1518	101	7720	2.16517	8.79107e-05	6.27959e-06	0.000406572
mmu05132:Salmonella infection	36	0.9942	3.30478e-07	ENSMUSG00000029380, ENSMUSG00000079426, ENSMUSG00000027012, ENSMUSG00000018930, ENSMUSG00000031165, ENSMUSG00000018293, ENSMUSG00000032508, ENSMUSG00000024927, ENSMUSG00000029580, ENSMUSG00000004864, ENSMUSG00000051439, ENSMUSG00000029379, ENSMUSG00000000982, ENSMUSG00000020009, ENSMUSG00000063065, ENSMUSG00000006699, ENSMUSG00000030793, ENSMUSG00000039005, ENSMUSG00000003546, ENSMUSG00000006304,…	1518	78	7720	2.34722	9.48428e-05	6.32314e-06	0.000438634
mmu05202:Transcriptional misregulation in cancer	61	1.68462	4.01568e-07	ENSMUSG00000000440, ENSMUSG00000006215, ENSMUSG00000003031, ENSMUSG00000059436, ENSMUSG00000060743, ENSMUSG00000038718, ENSMUSG00000068457, ENSMUSG00000024927, ENSMUSG00000025142, ENSMUSG00000022508, ENSMUSG00000028800, ENSMUSG00000037992, ENSMUSG00000032440, ENSMUSG00000021822, ENSMUSG00000022952, ENSMUSG00000005583, ENSMUSG00000044167, ENSMUSG00000046519, ENSMUSG00000027315, ENSMUSG00000034041,…	1518	166	7720	1.86882	0.000115243	7.20311e-06	0.000532989
mmu04145:Phagosome	63	1.73985	4.59873e-07	ENSMUSG00000027012, ENSMUSG00000078974, ENSMUSG00000019210, ENSMUSG00000019173, ENSMUSG00000006519, ENSMUSG00000029580, ENSMUSG00000030082, ENSMUSG00000058672, ENSMUSG00000033379, ENSMUSG00000036103, ENSMUSG00000031447, ENSMUSG00000043091, ENSMUSG00000062380, ENSMUSG00000028238, ENSMUSG00000056116, ENSMUSG00000007458, ENSMUSG00000001750, ENSMUSG00000059089, ENSMUSG00000051498, ENSMUSG00000030707,…	1518	174	7720	1.84135	0.000131975	7.76372e-06	0.000610375
mmu05144:Malaria	25	0.690417	2.21549e-06	ENSMUSG00000030830, ENSMUSG00000035352, ENSMUSG00000024401, ENSMUSG00000032508, ENSMUSG00000002603, ENSMUSG00000028864, ENSMUSG00000021702, ENSMUSG00000027962, ENSMUSG00000038067, ENSMUSG00000020592, ENSMUSG00000039005, ENSMUSG00000020717, ENSMUSG00000027398, ENSMUSG00000028047, ENSMUSG00000037405, ENSMUSG00000027995, ENSMUSG00000017652, ENSMUSG00000009376, ENSMUSG00000045322, ENSMUSG00000025746,…	1518	48	7720	2.64877	0.000635644	3.53241e-05	0.00294051
mmu04666:Fc gamma R-mediated phagocytosis	36	0.9942	2.78452e-06	ENSMUSG00000079426, ENSMUSG00000015947, ENSMUSG00000031165, ENSMUSG00000020573, ENSMUSG00000009621, ENSMUSG00000050965, ENSMUSG00000042228, ENSMUSG00000047945, ENSMUSG00000032462, ENSMUSG00000069662, ENSMUSG00000063065, ENSMUSG00000006699, ENSMUSG00000021759, ENSMUSG00000004508, ENSMUSG00000006304, ENSMUSG00000034116, ENSMUSG00000061878, ENSMUSG00000029621, ENSMUSG00000039936, ENSMUSG00000004936,…	1518	84	7720	2.17956	0.000798838	4.206e-05	0.00369575
mmu04066:HIF-1 signaling pathway	41	1.13228	6.10981e-06	ENSMUSG00000025877, ENSMUSG00000003031, ENSMUSG00000031465, ENSMUSG00000020053, ENSMUSG00000027947, ENSMUSG00000024927, ENSMUSG00000026773, ENSMUSG00000020190, ENSMUSG00000028156, ENSMUSG00000037411, ENSMUSG00000005534, ENSMUSG00000055839, ENSMUSG00000020573, ENSMUSG00000035027, ENSMUSG00000035105, ENSMUSG00000050965, ENSMUSG00000028645, ENSMUSG00000020009, ENSMUSG00000030339, ENSMUSG00000032462,…	1518	104	7720	2.00492	0.00175198	8.76721e-05	0.00810907
mmu04064:NF-kappa B signaling pathway	39	1.07705	6.24804e-06	ENSMUSG00000025225, ENSMUSG00000018930, ENSMUSG00000040296, ENSMUSG00000024402, ENSMUSG00000024401, ENSMUSG00000032508, ENSMUSG00000019850, ENSMUSG00000024927, ENSMUSG00000002983, ENSMUSG00000026942, ENSMUSG00000024387, ENSMUSG00000026031, ENSMUSG00000021822, ENSMUSG00000051439, ENSMUSG00000027962, ENSMUSG00000032688, ENSMUSG00000042228, ENSMUSG00000030339, ENSMUSG00000032487, ENSMUSG00000039005,…	1518	97	7720	2.04474	0.00179159	8.53865e-05	0.00829253
mmu04621:NOD-like receptor signaling pathway	26	0.718034	1.76195e-05	ENSMUSG00000035352, ENSMUSG00000055994, ENSMUSG00000024401, ENSMUSG00000019850, ENSMUSG00000024927, ENSMUSG00000035042, ENSMUSG00000004864, ENSMUSG00000069830, ENSMUSG00000063065, ENSMUSG00000030793, ENSMUSG00000021025, ENSMUSG00000022534, ENSMUSG00000027398, ENSMUSG00000028163, ENSMUSG00000030595, ENSMUSG00000032691, ENSMUSG00000025888, ENSMUSG00000039193, ENSMUSG00000078945, ENSMUSG00000027164,…	1518	56	7720	2.36119	0.00504407	0.00022983	0.0233833
mmu04932:Non-alcoholic fatty liver disease (NAFLD)	54	1.4913	1.86682e-05	ENSMUSG00000009863, ENSMUSG00000058076, ENSMUSG00000025204, ENSMUSG00000024778, ENSMUSG00000002603, ENSMUSG00000024927, ENSMUSG00000061518, ENSMUSG00000026942, ENSMUSG00000020573, ENSMUSG00000044894, ENSMUSG00000021764, ENSMUSG00000025651, ENSMUSG00000028944, ENSMUSG00000002108, ENSMUSG00000059734, ENSMUSG00000006699, ENSMUSG00000021116, ENSMUSG00000025076, ENSMUSG00000027398, ENSMUSG00000027399,…	1518	157	7720	1.7492	0.0053435	0.000232922	0.024775
mmu04060:Cytokine-cytokine receptor interaction	76	2.09887	2.142e-05	ENSMUSG00000007613, ENSMUSG00000026770, ENSMUSG00000018341, ENSMUSG00000024778, ENSMUSG00000002603, ENSMUSG00000010142, ENSMUSG00000017057, ENSMUSG00000028019, ENSMUSG00000035678, ENSMUSG00000032440, ENSMUSG00000035373, ENSMUSG00000035042, ENSMUSG00000000982, ENSMUSG00000050395, ENSMUSG00000024962, ENSMUSG00000079227, ENSMUSG00000025383, ENSMUSG00000028602, ENSMUSG00000000791, ENSMUSG00000049093,…	1518	245	7720	1.57759	0.00612875	0.000256117	0.0284264
mmu05205:Proteoglycans in cancer	65	1.79508	3.153e-05	ENSMUSG00000040385, ENSMUSG00000024778, ENSMUSG00000002603, ENSMUSG00000004266, ENSMUSG00000055723, ENSMUSG00000005718, ENSMUSG00000020573, ENSMUSG00000043733, ENSMUSG00000029580, ENSMUSG00000021822, ENSMUSG00000004864, ENSMUSG00000026193, ENSMUSG00000006699, ENSMUSG00000017009, ENSMUSG00000006932, ENSMUSG00000030265, ENSMUSG00000022637, ENSMUSG00000022831, ENSMUSG00000052397, ENSMUSG00000019768,…	1518	203	7720	1.62841	0.00900842	0.000361904	0.0418407
mmu05200:Pathways in cancer	111	3.06545	4.25869e-05	ENSMUSG00000031503, ENSMUSG00000026639, ENSMUSG00000024778, ENSMUSG00000024639, ENSMUSG00000026942, ENSMUSG00000029713, ENSMUSG00000020573, ENSMUSG00000035105, ENSMUSG00000032440, ENSMUSG00000028645, ENSMUSG00000039942, ENSMUSG00000022952, ENSMUSG00000026193, ENSMUSG00000024962, ENSMUSG00000048701, ENSMUSG00000030265, ENSMUSG00000022637, ENSMUSG00000028163, ENSMUSG00000031659, ENSMUSG00000021277,…	1518	397	7720	1.42193	0.0121483	0.000469993	0.0565096
mmu05161:Hepatitis B	50	1.38083	4.53267e-05	ENSMUSG00000007613, ENSMUSG00000042349, ENSMUSG00000003031, ENSMUSG00000033730, ENSMUSG00000032508, ENSMUSG00000024778, ENSMUSG00000002603, ENSMUSG00000024927, ENSMUSG00000027342, ENSMUSG00000087260, ENSMUSG00000037523, ENSMUSG00000020573, ENSMUSG00000040033, ENSMUSG00000019979, ENSMUSG00000002109, ENSMUSG00000021025, ENSMUSG00000030265, ENSMUSG00000020115, ENSMUSG00000028163, ENSMUSG00000022967,…	1518	146	7720	1.74166	0.0129248	0.0004817	0.0601441
mmu05321:Inflammatory bowel disease (IBD)	26	0.718034	5.19131e-05	ENSMUSG00000024401, ENSMUSG00000055994, ENSMUSG00000018341, ENSMUSG00000002603, ENSMUSG00000024927, ENSMUSG00000026104, ENSMUSG00000032402, ENSMUSG00000032238, ENSMUSG00000020009, ENSMUSG00000025383, ENSMUSG00000000791, ENSMUSG00000049093, ENSMUSG00000039005, ENSMUSG00000027398, ENSMUSG00000055435, ENSMUSG00000027399, ENSMUSG00000028163, ENSMUSG00000027995, ENSMUSG00000004296, ENSMUSG00000026068,…	1518	59	7720	2.24113	0.014789	0.000531981	0.0688808
mmu04071:Sphingolipid signaling pathway	44	1.21513	5.49979e-05	ENSMUSG00000043154, ENSMUSG00000024401, ENSMUSG00000007891, ENSMUSG00000021054, ENSMUSG00000024927, ENSMUSG00000024639, ENSMUSG00000027035, ENSMUSG00000026942, ENSMUSG00000023021, ENSMUSG00000019822, ENSMUSG00000020573, ENSMUSG00000035027, ENSMUSG00000050965, ENSMUSG00000020611, ENSMUSG00000004864, ENSMUSG00000023088, ENSMUSG00000032462, ENSMUSG00000051177, ENSMUSG00000063065, ENSMUSG00000018012,…	1518	124	7720	1.80458	0.0156609	0.000544156	0.0729725
mmu04144:Endocytosis	82	2.26457	7.13578e-05	ENSMUSG00000023353, ENSMUSG00000007613, ENSMUSG00000005656, ENSMUSG00000003228, ENSMUSG00000031165, ENSMUSG00000026770, ENSMUSG00000002603, ENSMUSG00000037098, ENSMUSG00000041115, ENSMUSG00000032870, ENSMUSG00000019173, ENSMUSG00000006058, ENSMUSG00000032402, ENSMUSG00000032440, ENSMUSG00000041058, ENSMUSG00000028745, ENSMUSG00000031488, ENSMUSG00000023830, ENSMUSG00000079227, ENSMUSG00000024772,…	1518	278	7720	1.50008	0.0202721	0.000682448	0.0946698
mmu04141:Protein processing in endoplasmic reticulum	55	1.51892	7.23493e-05	ENSMUSG00000039703, ENSMUSG00000039530, ENSMUSG00000078974, ENSMUSG00000025823, ENSMUSG00000030298, ENSMUSG00000026942, ENSMUSG00000039234, ENSMUSG00000027455, ENSMUSG00000042104, ENSMUSG00000030082, ENSMUSG00000020571, ENSMUSG00000003746, ENSMUSG00000030062, ENSMUSG00000032116, ENSMUSG00000032115, ENSMUSG00000051984, ENSMUSG00000021116, ENSMUSG00000035325, ENSMUSG00000075701, ENSMUSG00000004460,…	1518	168	7720	1.66494	0.0205509	0.000669614	0.0959845
mmu01130:Biosynthesis of antibiotics	66	1.8227	9.70616e-05	ENSMUSG00000009863, ENSMUSG00000023456, ENSMUSG00000032294, ENSMUSG00000032607, ENSMUSG00000031400, ENSMUSG00000017390, ENSMUSG00000058076, ENSMUSG00000025791, ENSMUSG00000026670, ENSMUSG00000001467, ENSMUSG00000035473, ENSMUSG00000023262, ENSMUSG00000060376, ENSMUSG00000005686, ENSMUSG00000031604, ENSMUSG00000027452, ENSMUSG00000059040, ENSMUSG00000029992, ENSMUSG00000011752, ENSMUSG00000003526,…	1518	214	7720	1.56847	0.0274736	0.000870185	0.12875
mmu04650:Natural killer cell mediated cytotoxicity	38	1.04943	0.000122194	ENSMUSG00000030830, ENSMUSG00000002699, ENSMUSG00000024401, ENSMUSG00000024778, ENSMUSG00000078452, ENSMUSG00000004266, ENSMUSG00000009621, ENSMUSG00000043733, ENSMUSG00000020573, ENSMUSG00000031628, ENSMUSG00000035027, ENSMUSG00000050965, ENSMUSG00000022971, ENSMUSG00000020009, ENSMUSG00000059456, ENSMUSG00000032462, ENSMUSG00000015437, ENSMUSG00000063065, ENSMUSG00000018012, ENSMUSG00000053219,…	1518	105	7720	1.84052	0.0344639	0.00106222	0.162063
mmu05145:Toxoplasmosis	40	1.10467	0.000135091	ENSMUSG00000018932, ENSMUSG00000046879, ENSMUSG00000024401, ENSMUSG00000032508, ENSMUSG00000026639, ENSMUSG00000002603, ENSMUSG00000024927, ENSMUSG00000025701, ENSMUSG00000026104, ENSMUSG00000022504, ENSMUSG00000031628, ENSMUSG00000020573, ENSMUSG00000004864, ENSMUSG00000020009, ENSMUSG00000079227, ENSMUSG00000021868, ENSMUSG00000032462, ENSMUSG00000063065, ENSMUSG00000039005, ENSMUSG00000021025,…	1518	113	7720	1.80023	0.0380318	0.00113976	0.179154
mmu04662:B cell receptor signaling pathway	28	0.773267	0.000182531	ENSMUSG00000028159, ENSMUSG00000024927, ENSMUSG00000004266, ENSMUSG00000009621, ENSMUSG00000020573, ENSMUSG00000025017, ENSMUSG00000035027, ENSMUSG00000032688, ENSMUSG00000042228, ENSMUSG00000032462, ENSMUSG00000063065, ENSMUSG00000018012, ENSMUSG00000021025, ENSMUSG00000034116, ENSMUSG00000030265, ENSMUSG00000028161, ENSMUSG00000030577, ENSMUSG00000039936, ENSMUSG00000004936, ENSMUSG00000023947,…	1518	70	7720	2.03426	0.0510424	0.00149577	0.241997
mmu01100:Metabolic pathways	299	8.25739	0.000222647	ENSMUSG00000034570, ENSMUSG00000062646, ENSMUSG00000025204, ENSMUSG00000058076, ENSMUSG00000025791, ENSMUSG00000029780, ENSMUSG00000064345, ENSMUSG00000061518, ENSMUSG00000064341, ENSMUSG00000047250, ENSMUSG00000033379, ENSMUSG00000034579, ENSMUSG00000021123, ENSMUSG00000027452, ENSMUSG00000032640, ENSMUSG00000006395, ENSMUSG00000059734, ENSMUSG00000059040, ENSMUSG00000000276, ENSMUSG00000029992,…	1518	1278	7720	1.18983	0.0619075	0.00177361	0.295109
mmu04670:Leukocyte transendothelial migration	41	1.13228	0.000315536	ENSMUSG00000052681, ENSMUSG00000030830, ENSMUSG00000034101, ENSMUSG00000006519, ENSMUSG00000009621, ENSMUSG00000029580, ENSMUSG00000043733, ENSMUSG00000020573, ENSMUSG00000021823, ENSMUSG00000050965, ENSMUSG00000004864, ENSMUSG00000027962, ENSMUSG00000059456, ENSMUSG00000032462, ENSMUSG00000006699, ENSMUSG00000058230, ENSMUSG00000006932, ENSMUSG00000020717, ENSMUSG00000034116, ENSMUSG00000035133,…	1518	121	7720	1.72323	0.0865925	0.00244493	0.417992
mmu04810:Regulation of actin cytoskeleton	64	1.76747	0.000325361	ENSMUSG00000030830, ENSMUSG00000031165, ENSMUSG00000018293, ENSMUSG00000040385, ENSMUSG00000026737, ENSMUSG00000049775, ENSMUSG00000055723, ENSMUSG00000009621, ENSMUSG00000028019, ENSMUSG00000020573, ENSMUSG00000029580, ENSMUSG00000021823, ENSMUSG00000034664, ENSMUSG00000026193, ENSMUSG00000006699, ENSMUSG00000058230, ENSMUSG00000037946, ENSMUSG00000020340, ENSMUSG00000034616, ENSMUSG00000030265,…	1518	214	7720	1.52094	0.0891652	0.00245471	0.430981
mmu05160:Hepatitis C	44	1.21513	0.000563836	ENSMUSG00000032661, ENSMUSG00000042349, ENSMUSG00000040296, ENSMUSG00000024401, ENSMUSG00000024927, ENSMUSG00000052776, ENSMUSG00000026104, ENSMUSG00000002325, ENSMUSG00000026942, ENSMUSG00000037523, ENSMUSG00000066800, ENSMUSG00000020573, ENSMUSG00000040033, ENSMUSG00000015846, ENSMUSG00000022971, ENSMUSG00000031668, ENSMUSG00000004864, ENSMUSG00000079339, ENSMUSG00000053113, ENSMUSG00000034459,…	1518	136	7720	1.64535	0.149445	0.00414183	0.74578
mmu05166:HTLV-I infection	78	2.1541	0.000601517	ENSMUSG00000003575, ENSMUSG00000007613, ENSMUSG00000030830, ENSMUSG00000029430, ENSMUSG00000026770, ENSMUSG00000002603, ENSMUSG00000024927, ENSMUSG00000000708, ENSMUSG00000027342, ENSMUSG00000055723, ENSMUSG00000020573, ENSMUSG00000032402, ENSMUSG00000032440, ENSMUSG00000028645, ENSMUSG00000027962, ENSMUSG00000021025, ENSMUSG00000006932, ENSMUSG00000056116, ENSMUSG00000030265, ENSMUSG00000028161,…	1518	278	7720	1.42691	0.158599	0.00430788	0.795437
mmu04510:Focal adhesion	61	1.68462	0.000693382	ENSMUSG00000031503, ENSMUSG00000040385, ENSMUSG00000026639, ENSMUSG00000009621, ENSMUSG00000028019, ENSMUSG00000020573, ENSMUSG00000029580, ENSMUSG00000021823, ENSMUSG00000039844, ENSMUSG00000034664, ENSMUSG00000026193, ENSMUSG00000024962, ENSMUSG00000006699, ENSMUSG00000058230, ENSMUSG00000006932, ENSMUSG00000033220, ENSMUSG00000000184, ENSMUSG00000052698, ENSMUSG00000062960, ENSMUSG00000020580,…	1518	207	7720	1.49867	0.180507	0.00484359	0.916401
mmu04068:FoxO signaling pathway	43	1.18752	0.000792952	ENSMUSG00000007613, ENSMUSG00000003573, ENSMUSG00000022433, ENSMUSG00000003031, ENSMUSG00000070348, ENSMUSG00000020053, ENSMUSG00000002603, ENSMUSG00000022508, ENSMUSG00000021701, ENSMUSG00000037111, ENSMUSG00000005534, ENSMUSG00000078566, ENSMUSG00000032905, ENSMUSG00000020573, ENSMUSG00000055148, ENSMUSG00000015312, ENSMUSG00000031666, ENSMUSG00000035027, ENSMUSG00000032440, ENSMUSG00000032402,…	1518	134	7720	1.63196	0.203611	0.00540599	1.04736
mmu04015:Rap1 signaling pathway	62	1.71223	0.000999632	ENSMUSG00000030830, ENSMUSG00000002699, ENSMUSG00000018293, ENSMUSG00000018500, ENSMUSG00000020178, ENSMUSG00000019370, ENSMUSG00000034101, ENSMUSG00000004451, ENSMUSG00000024639, ENSMUSG00000028019, ENSMUSG00000020573, ENSMUSG00000029580, ENSMUSG00000039844, ENSMUSG00000004864, ENSMUSG00000034664, ENSMUSG00000024962, ENSMUSG00000027765, ENSMUSG00000051177, ENSMUSG00000006699, ENSMUSG00000001175,…	1518	214	7720	1.47341	0.249517	0.00665307	1.31868
mmu05203:Viral carcinogenesis	66	1.8227	0.00100437	ENSMUSG00000032294, ENSMUSG00000001424, ENSMUSG00000003031, ENSMUSG00000033730, ENSMUSG00000024927, ENSMUSG00000000708, ENSMUSG00000020849, ENSMUSG00000024521, ENSMUSG00000026942, ENSMUSG00000028800, ENSMUSG00000020573, ENSMUSG00000018102, ENSMUSG00000026222, ENSMUSG00000079227, ENSMUSG00000006699, ENSMUSG00000028238, ENSMUSG00000021025, ENSMUSG00000056116, ENSMUSG00000030265, ENSMUSG00000026875,…	1518	231	7720	1.45304	0.250537	0.00653306	1.32488
mmu00010:Glycolysis / Gluconeogenesis	25	0.690417	0.00110427	ENSMUSG00000025877, ENSMUSG00000032294, ENSMUSG00000023456, ENSMUSG00000024896, ENSMUSG00000063229, ENSMUSG00000017390, ENSMUSG00000025791, ENSMUSG00000062070, ENSMUSG00000029455, ENSMUSG00000035473, ENSMUSG00000034793, ENSMUSG00000027452, ENSMUSG00000028138, ENSMUSG00000059040, ENSMUSG00000011752, ENSMUSG00000024885, ENSMUSG00000000628, ENSMUSG00000020277, ENSMUSG00000063524, ENSMUSG00000036427,…	1518	66	7720	1.92638	0.271742	0.00702191	1.45578
mmu01200:Carbon metabolism	38	1.04943	0.00111079	ENSMUSG00000025877, ENSMUSG00000032294, ENSMUSG00000009863, ENSMUSG00000026005, ENSMUSG00000023456, ENSMUSG00000032607, ENSMUSG00000031400, ENSMUSG00000028961, ENSMUSG00000017390, ENSMUSG00000058076, ENSMUSG00000062070, ENSMUSG00000032279, ENSMUSG00000032527, ENSMUSG00000028980, ENSMUSG00000029009, ENSMUSG00000031807, ENSMUSG00000021238, ENSMUSG00000027452, ENSMUSG00000028138, ENSMUSG00000059040,…	1518	116	7720	1.66599	0.273106	0.00691025	1.46432
mmu05012:Parkinson's disease	46	1.27037	0.00125115	ENSMUSG00000009863, ENSMUSG00000036273, ENSMUSG00000023286, ENSMUSG00000028964, ENSMUSG00000029632, ENSMUSG00000058076, ENSMUSG00000025204, ENSMUSG00000024248, ENSMUSG00000001924, ENSMUSG00000020178, ENSMUSG00000018770, ENSMUSG00000021606, ENSMUSG00000064345, ENSMUSG00000061518, ENSMUSG00000064363, ENSMUSG00000064341, ENSMUSG00000031628, ENSMUSG00000026032, ENSMUSG00000064367, ENSMUSG00000041697,…	1518	149	7720	1.57006	0.301839	0.00761565	1.64793
mmu05143:African trypanosomiasis	16	0.441867	0.00141736	ENSMUSG00000027398, ENSMUSG00000032508, ENSMUSG00000024401, ENSMUSG00000024778, ENSMUSG00000037405, ENSMUSG00000004296, ENSMUSG00000078816, ENSMUSG00000024639, ENSMUSG00000045322, ENSMUSG00000050965, ENSMUSG00000025746, ENSMUSG00000027962, ENSMUSG00000055170, ENSMUSG00000016529, ENSMUSG00000027776, ENSMUSG00000051177	1518	35	7720	2.32486	0.334402	0.00844476	1.86494
mmu04210:Apoptosis	23	0.635184	0.00154779	ENSMUSG00000021025, ENSMUSG00000025076, ENSMUSG00000031887, ENSMUSG00000025860, ENSMUSG00000024401, ENSMUSG00000024778, ENSMUSG00000071714, ENSMUSG00000039936, ENSMUSG00000024927, ENSMUSG00000003873, ENSMUSG00000028163, ENSMUSG00000071713, ENSMUSG00000063694, ENSMUSG00000026942, ENSMUSG00000020573, ENSMUSG00000031628, ENSMUSG00000026031, ENSMUSG00000019979, ENSMUSG00000007659, ENSMUSG00000039304,…	1518	60	7720	1.94949	0.358893	0.0090316	2.03494
mmu04622:RIG-I-like receptor signaling pathway	25	0.690417	0.00177541	ENSMUSG00000039285, ENSMUSG00000042349, ENSMUSG00000021025, ENSMUSG00000031887, ENSMUSG00000021754, ENSMUSG00000040296, ENSMUSG00000020115, ENSMUSG00000024401, ENSMUSG00000024927, ENSMUSG00000028163, ENSMUSG00000030595, ENSMUSG00000004296, ENSMUSG00000026942, ENSMUSG00000037523, ENSMUSG00000032905, ENSMUSG00000034855, ENSMUSG00000026896, ENSMUSG00000027164, ENSMUSG00000021277, ENSMUSG00000004864,…	1518	68	7720	1.86972	0.399501	0.010148	2.33094
mmu04920:Adipocytokine signaling pathway	26	0.718034	0.00186931	ENSMUSG00000032281, ENSMUSG00000021025, ENSMUSG00000031887, ENSMUSG00000020785, ENSMUSG00000018796, ENSMUSG00000024789, ENSMUSG00000039656, ENSMUSG00000024401, ENSMUSG00000024927, ENSMUSG00000029471, ENSMUSG00000028163, ENSMUSG00000023947, ENSMUSG00000030595, ENSMUSG00000026942, ENSMUSG00000043733, ENSMUSG00000038205, ENSMUSG00000015846, ENSMUSG00000028645, ENSMUSG00000038894, ENSMUSG00000034793,…	1518	72	7720	1.83648	0.415497	0.010474	2.45282
mmu05222:Small cell lung cancer	29	0.800884	0.002076	ENSMUSG00000070348, ENSMUSG00000031503, ENSMUSG00000039656, ENSMUSG00000026639, ENSMUSG00000059436, ENSMUSG00000024927, ENSMUSG00000026942, ENSMUSG00000020573, ENSMUSG00000015846, ENSMUSG00000034664, ENSMUSG00000019979, ENSMUSG00000026193, ENSMUSG00000032462, ENSMUSG00000032487, ENSMUSG00000021025, ENSMUSG00000025860, ENSMUSG00000018983, ENSMUSG00000039936, ENSMUSG00000026875, ENSMUSG00000028163,…	1518	84	7720	1.75576	0.449227	0.0114043	2.72059
mmu04660:T cell receptor signaling pathway	34	0.938967	0.00221272	ENSMUSG00000027347, ENSMUSG00000002699, ENSMUSG00000024401, ENSMUSG00000024927, ENSMUSG00000004266, ENSMUSG00000009621, ENSMUSG00000020573, ENSMUSG00000035027, ENSMUSG00000004864, ENSMUSG00000029217, ENSMUSG00000032688, ENSMUSG00000032462, ENSMUSG00000063065, ENSMUSG00000006699, ENSMUSG00000023274, ENSMUSG00000021025, ENSMUSG00000034116, ENSMUSG00000030265, ENSMUSG00000022637, ENSMUSG00000028161,…	1518	104	7720	1.66261	0.470464	0.0119237	2.89733
mmu05146:Amoebiasis	37	1.02182	0.0025945	ENSMUSG00000060147, ENSMUSG00000031503, ENSMUSG00000024401, ENSMUSG00000026639, ENSMUSG00000002603, ENSMUSG00000024927, ENSMUSG00000034781, ENSMUSG00000019173, ENSMUSG00000062345, ENSMUSG00000024639, ENSMUSG00000020573, ENSMUSG00000031628, ENSMUSG00000021823, ENSMUSG00000050965, ENSMUSG00000051439, ENSMUSG00000026193, ENSMUSG00000044734, ENSMUSG00000034792, ENSMUSG00000026073, ENSMUSG00000032462,…	1518	117	7720	1.60828	0.525545	0.0137123	3.38931
mmu05100:Bacterial invasion of epithelial cells	27	0.74565	0.00294759	ENSMUSG00000006699, ENSMUSG00000059248, ENSMUSG00000079426, ENSMUSG00000006932, ENSMUSG00000006304, ENSMUSG00000031165, ENSMUSG00000029621, ENSMUSG00000022637, ENSMUSG00000022831, ENSMUSG00000039936, ENSMUSG00000008475, ENSMUSG00000047547, ENSMUSG00000029465, ENSMUSG00000009376, ENSMUSG00000000555, ENSMUSG00000029580, ENSMUSG00000020573, ENSMUSG00000029003, ENSMUSG00000021823, ENSMUSG00000000058,…	1518	78	7720	1.76041	0.57139	0.0152857	3.84227
mmu04612:Antigen processing and presentation	28	0.773267	0.00301164	ENSMUSG00000024308, ENSMUSG00000024401, ENSMUSG00000003814, ENSMUSG00000060550, ENSMUSG00000022504, ENSMUSG00000061232, ENSMUSG00000079491, ENSMUSG00000021477, ENSMUSG00000067235, ENSMUSG00000073409, ENSMUSG00000005774, ENSMUSG00000023274, ENSMUSG00000038642, ENSMUSG00000053835, ENSMUSG00000056116, ENSMUSG00000067212, ENSMUSG00000078153, ENSMUSG00000022216, ENSMUSG00000079197, ENSMUSG00000024339,…	1518	82	7720	1.73656	0.57922	0.0153391	3.92422
mmu05323:Rheumatoid arthritis	28	0.773267	0.00301164	ENSMUSG00000030830, ENSMUSG00000019302, ENSMUSG00000024403, ENSMUSG00000035352, ENSMUSG00000019210, ENSMUSG00000024401, ENSMUSG00000002603, ENSMUSG00000038023, ENSMUSG00000035042, ENSMUSG00000033379, ENSMUSG00000033793, ENSMUSG00000000982, ENSMUSG00000021477, ENSMUSG00000025383, ENSMUSG00000001348, ENSMUSG00000028238, ENSMUSG00000039005, ENSMUSG00000027398, ENSMUSG00000027399, ENSMUSG00000037405,…	1518	82	7720	1.73656	0.57922	0.0153391	3.92422
mmu00190:Oxidative phosphorylation	42	1.1599	0.00325716	ENSMUSG00000009863, ENSMUSG00000019302, ENSMUSG00000024403, ENSMUSG00000019210, ENSMUSG00000029632, ENSMUSG00000058076, ENSMUSG00000025204, ENSMUSG00000024248, ENSMUSG00000018770, ENSMUSG00000021606, ENSMUSG00000064345, ENSMUSG00000061518, ENSMUSG00000064363, ENSMUSG00000064341, ENSMUSG00000026032, ENSMUSG00000064367, ENSMUSG00000038023, ENSMUSG00000041697, ENSMUSG00000044894, ENSMUSG00000031231,…	1518	139	7720	1.53667	0.607936	0.0162927	4.23778
mmu04710:Circadian rhythm	14	0.386634	0.00367122	ENSMUSG00000038205, ENSMUSG00000029238, ENSMUSG00000028957, ENSMUSG00000022433, ENSMUSG00000020271, ENSMUSG00000032238, ENSMUSG00000020038, ENSMUSG00000055116, ENSMUSG00000022124, ENSMUSG00000030256, ENSMUSG00000020889, ENSMUSG00000028944, ENSMUSG00000068742, ENSMUSG00000022400	1518	31	7720	2.29674	0.652009	0.018035	4.76444
mmu04370:VEGF signaling pathway	22	0.607567	0.00375998	ENSMUSG00000018012, ENSMUSG00000006699, ENSMUSG00000030265, ENSMUSG00000061878, ENSMUSG00000028161, ENSMUSG00000039936, ENSMUSG00000004936, ENSMUSG00000078816, ENSMUSG00000033220, ENSMUSG00000057342, ENSMUSG00000022092, ENSMUSG00000020573, ENSMUSG00000035027, ENSMUSG00000050965, ENSMUSG00000004864, ENSMUSG00000062960, ENSMUSG00000016528, ENSMUSG00000056220, ENSMUSG00000016933, ENSMUSG00000032462,…	1518	60	7720	1.86473	0.660795	0.0181577	4.87699
mmu05210:Colorectal cancer	23	0.635184	0.00393438	ENSMUSG00000018012, ENSMUSG00000007613, ENSMUSG00000006932, ENSMUSG00000014850, ENSMUSG00000070348, ENSMUSG00000030265, ENSMUSG00000026821, ENSMUSG00000002603, ENSMUSG00000039936, ENSMUSG00000004936, ENSMUSG00000003873, ENSMUSG00000063694, ENSMUSG00000033220, ENSMUSG00000020573, ENSMUSG00000031628, ENSMUSG00000032402, ENSMUSG00000032440, ENSMUSG00000005871, ENSMUSG00000057329, ENSMUSG00000007815,…	1518	64	7720	1.82765	0.677417	0.0186799	5.09777
mmu04623:Cytosolic DNA-sensing pathway	23	0.635184	0.00393438	ENSMUSG00000030793, ENSMUSG00000042349, ENSMUSG00000021025, ENSMUSG00000035834, ENSMUSG00000018930, ENSMUSG00000027514, ENSMUSG00000034453, ENSMUSG00000040296, ENSMUSG00000020115, ENSMUSG00000027398, ENSMUSG00000024927, ENSMUSG00000028163, ENSMUSG00000030595, ENSMUSG00000025888, ENSMUSG00000037523, ENSMUSG00000022221, ENSMUSG00000034855, ENSMUSG00000027951, ENSMUSG00000032344, ENSMUSG00000025746,…	1518	64	7720	1.82765	0.677417	0.0186799	5.09777
mmu04062:Chemokine signaling pathway	55	1.51892	0.00421455	ENSMUSG00000029380, ENSMUSG00000003228, ENSMUSG00000031165, ENSMUSG00000024927, ENSMUSG00000029713, ENSMUSG00000009621, ENSMUSG00000020573, ENSMUSG00000040033, ENSMUSG00000035373, ENSMUSG00000035042, ENSMUSG00000000982, ENSMUSG00000029379, ENSMUSG00000079227, ENSMUSG00000051177, ENSMUSG00000006699, ENSMUSG00000021025, ENSMUSG00000028874, ENSMUSG00000024789, ENSMUSG00000030265, ENSMUSG00000018920,…	1518	196	7720	1.42709	0.702438	0.0196749	5.45145
mmu00500:Starch and sucrose metabolism	14	0.386634	0.00508913	ENSMUSG00000030729, ENSMUSG00000025877, ENSMUSG00000062646, ENSMUSG00000001891, ENSMUSG00000000628, ENSMUSG00000025791, ENSMUSG00000021069, ENSMUSG00000022707, ENSMUSG00000003865, ENSMUSG00000025579, ENSMUSG00000036427, ENSMUSG00000034793, ENSMUSG00000037012, ENSMUSG00000037370	1518	32	7720	2.22497	0.768762	0.0233412	6.5477
mmu05010:Alzheimer's disease	50	1.38083	0.00562819	ENSMUSG00000009863, ENSMUSG00000020788, ENSMUSG00000058076, ENSMUSG00000025204, ENSMUSG00000024778, ENSMUSG00000018770, ENSMUSG00000019370, ENSMUSG00000061518, ENSMUSG00000024639, ENSMUSG00000032086, ENSMUSG00000044894, ENSMUSG00000019979, ENSMUSG00000021764, ENSMUSG00000025651, ENSMUSG00000051177, ENSMUSG00000059734, ENSMUSG00000052593, ENSMUSG00000001175, ENSMUSG00000029467, ENSMUSG00000025076,…	1518	177	7720	1.43662	0.802072	0.0253842	7.21753
mmu05216:Thyroid cancer	13	0.359017	0.00590301	ENSMUSG00000000440, ENSMUSG00000027940, ENSMUSG00000006932, ENSMUSG00000035027, ENSMUSG00000015846, ENSMUSG00000070348, ENSMUSG00000030265, ENSMUSG00000039656, ENSMUSG00000022757, ENSMUSG00000004936, ENSMUSG00000048701, ENSMUSG00000024985, ENSMUSG00000063065	1518	29	7720	2.27977	0.817168	0.0262004	7.5573
mmu04010:MAPK signaling pathway	67	1.85032	0.00679146	ENSMUSG00000027347, ENSMUSG00000007613, ENSMUSG00000024778, ENSMUSG00000059436, ENSMUSG00000002603, ENSMUSG00000034765, ENSMUSG00000024927, ENSMUSG00000055723, ENSMUSG00000026942, ENSMUSG00000015312, ENSMUSG00000032440, ENSMUSG00000004864, ENSMUSG00000002307, ENSMUSG00000005583, ENSMUSG00000037337, ENSMUSG00000006699, ENSMUSG00000053395, ENSMUSG00000004085, ENSMUSG00000030265, ENSMUSG00000027398,…	1518	253	7720	1.34679	0.858548	0.029641	8.64787
mmu04630:Jak-STAT signaling pathway	42	1.1599	0.00730968	ENSMUSG00000026770, ENSMUSG00000070348, ENSMUSG00000018341, ENSMUSG00000027947, ENSMUSG00000055371, ENSMUSG00000004266, ENSMUSG00000026104, ENSMUSG00000002325, ENSMUSG00000023206, ENSMUSG00000017057, ENSMUSG00000020573, ENSMUSG00000043733, ENSMUSG00000040033, ENSMUSG00000022971, ENSMUSG00000020009, ENSMUSG00000020027, ENSMUSG00000038067, ENSMUSG00000025383, ENSMUSG00000000791, ENSMUSG00000053113,…	1518	145	7720	1.47308	0.878225	0.0313992	9.27848
mmu00030:Pentose phosphate pathway	13	0.359017	0.00811112	ENSMUSG00000020277, ENSMUSG00000030225, ENSMUSG00000026005, ENSMUSG00000036427, ENSMUSG00000031400, ENSMUSG00000017390, ENSMUSG00000028961, ENSMUSG00000021196, ENSMUSG00000025791, ENSMUSG00000025742, ENSMUSG00000031807, ENSMUSG00000030695, ENSMUSG00000028980	1518	30	7720	2.20378	0.90342	0.0342848	10.2458
mmu04014:Ras signaling pathway	61	1.68462	0.00867277	ENSMUSG00000027347, ENSMUSG00000060675, ENSMUSG00000024927, ENSMUSG00000019173, ENSMUSG00000019370, ENSMUSG00000055723, ENSMUSG00000004451, ENSMUSG00000029713, ENSMUSG00000021357, ENSMUSG00000043733, ENSMUSG00000020573, ENSMUSG00000028019, ENSMUSG00000034579, ENSMUSG00000002847, ENSMUSG00000024962, ENSMUSG00000006699, ENSMUSG00000001175, ENSMUSG00000031453, ENSMUSG00000020115, ENSMUSG00000030265,…	1518	229	7720	1.35469	0.91791	0.0360962	10.918
mmu05230:Central carbon metabolism in cancer	22	0.607567	0.0087092	ENSMUSG00000025877, ENSMUSG00000032294, ENSMUSG00000011752, ENSMUSG00000006494, ENSMUSG00000031400, ENSMUSG00000030265, ENSMUSG00000000628, ENSMUSG00000039936, ENSMUSG00000004936, ENSMUSG00000009376, ENSMUSG00000020277, ENSMUSG00000020573, ENSMUSG00000035027, ENSMUSG00000024620, ENSMUSG00000028645, ENSMUSG00000021196, ENSMUSG00000025161, ENSMUSG00000025486, ENSMUSG00000037012, ENSMUSG00000032462,…	1518	64	7720	1.74819	0.918772	0.03573	10.9615
mmu05220:Chronic myeloid leukemia	24	0.6628	0.00888075	ENSMUSG00000007613, ENSMUSG00000009681, ENSMUSG00000021025, ENSMUSG00000004508, ENSMUSG00000003031, ENSMUSG00000070348, ENSMUSG00000030265, ENSMUSG00000018983, ENSMUSG00000022637, ENSMUSG00000002603, ENSMUSG00000039936, ENSMUSG00000004936, ENSMUSG00000024927, ENSMUSG00000028163, ENSMUSG00000020184, ENSMUSG00000020573, ENSMUSG00000043733, ENSMUSG00000028800, ENSMUSG00000035027, ENSMUSG00000032440,…	1518	72	7720	1.69521	0.922708	0.035913	11.1658
mmu00051:Fructose and mannose metabolism	14	0.386634	0.0092205	ENSMUSG00000025877, ENSMUSG00000025648, ENSMUSG00000023456, ENSMUSG00000017390, ENSMUSG00000000628, ENSMUSG00000022570, ENSMUSG00000026773, ENSMUSG00000020277, ENSMUSG00000026409, ENSMUSG00000021196, ENSMUSG00000037012, ENSMUSG00000070284, ENSMUSG00000030695, ENSMUSG00000027227	1518	34	7720	2.09409	0.929951	0.0367521	11.5691
mmu04722:Neurotrophin signaling pathway	36	0.9942	0.00993846	ENSMUSG00000052681, ENSMUSG00000020227, ENSMUSG00000020849, ENSMUSG00000030733, ENSMUSG00000036333, ENSMUSG00000024927, ENSMUSG00000019370, ENSMUSG00000021514, ENSMUSG00000020573, ENSMUSG00000043733, ENSMUSG00000035027, ENSMUSG00000039844, ENSMUSG00000004864, ENSMUSG00000032462, ENSMUSG00000063065, ENSMUSG00000006699, ENSMUSG00000001175, ENSMUSG00000021025, ENSMUSG00000021754, ENSMUSG00000030265,…	1518	122	7720	1.50068	0.943108	0.0390318	12.4159
mmu05212:Pancreatic cancer	22	0.607567	0.0105428	ENSMUSG00000018012, ENSMUSG00000006699, ENSMUSG00000031133, ENSMUSG00000007613, ENSMUSG00000070348, ENSMUSG00000030265, ENSMUSG00000018983, ENSMUSG00000026821, ENSMUSG00000002603, ENSMUSG00000039936, ENSMUSG00000004936, ENSMUSG00000024927, ENSMUSG00000028163, ENSMUSG00000026104, ENSMUSG00000033220, ENSMUSG00000004451, ENSMUSG00000020573, ENSMUSG00000032402, ENSMUSG00000032440, ENSMUSG00000007659,…	1518	65	7720	1.72129	0.952253	0.0408129	13.1228
mmu04611:Platelet activation	38	1.04943	0.010664	ENSMUSG00000027347, ENSMUSG00000052681, ENSMUSG00000050732, ENSMUSG00000029925, ENSMUSG00000002699, ENSMUSG00000024965, ENSMUSG00000040385, ENSMUSG00000024639, ENSMUSG00000020573, ENSMUSG00000029580, ENSMUSG00000028465, ENSMUSG00000020611, ENSMUSG00000004864, ENSMUSG00000047250, ENSMUSG00000034664, ENSMUSG00000042228, ENSMUSG00000059495, ENSMUSG00000027765, ENSMUSG00000032462, ENSMUSG00000063065,…	1518	131	7720	1.47522	0.953902	0.0407283	13.2639
mmu04910:Insulin signaling pathway	40	1.10467	0.011312	ENSMUSG00000025877, ENSMUSG00000040385, ENSMUSG00000032601, ENSMUSG00000003123, ENSMUSG00000020190, ENSMUSG00000028156, ENSMUSG00000019370, ENSMUSG00000003865, ENSMUSG00000005534, ENSMUSG00000020573, ENSMUSG00000035027, ENSMUSG00000039844, ENSMUSG00000020027, ENSMUSG00000034793, ENSMUSG00000044167, ENSMUSG00000028944, ENSMUSG00000053113, ENSMUSG00000032462, ENSMUSG00000063065, ENSMUSG00000019487,…	1518	140	7720	1.45304	0.961805	0.0426001	14.015
mmu00564:Glycerophospholipid metabolism	29	0.800884	0.0117835	ENSMUSG00000029314, ENSMUSG00000027346, ENSMUSG00000024843, ENSMUSG00000036833, ENSMUSG00000060675, ENSMUSG00000022861, ENSMUSG00000030275, ENSMUSG00000024052, ENSMUSG00000038732, ENSMUSG00000034579, ENSMUSG00000026827, ENSMUSG00000031467, ENSMUSG00000027134, ENSMUSG00000020593, ENSMUSG00000033192, ENSMUSG00000031903, ENSMUSG00000058793, ENSMUSG00000040774, ENSMUSG00000000276, ENSMUSG00000023827,…	1518	94	7720	1.56897	0.966692	0.0437755	14.5576
mmu05150:Staphylococcus aureus infection	18	0.4971	0.0119202	ENSMUSG00000030830, ENSMUSG00000056529, ENSMUSG00000015947, ENSMUSG00000049130, ENSMUSG00000045551, ENSMUSG00000036905, ENSMUSG00000037405, ENSMUSG00000059089, ENSMUSG00000048163, ENSMUSG00000090231, ENSMUSG00000055172, ENSMUSG00000059498, ENSMUSG00000052270, ENSMUSG00000016529, ENSMUSG00000026365, ENSMUSG00000073418, ENSMUSG00000038521, ENSMUSG00000024164	1518	50	7720	1.83083	0.967988	0.0437125	14.7143
mmu04150:mTOR signaling pathway	20	0.552334	0.0151003	ENSMUSG00000031490, ENSMUSG00000024401, ENSMUSG00000020053, ENSMUSG00000026812, ENSMUSG00000039936, ENSMUSG00000078816, ENSMUSG00000029512, ENSMUSG00000028156, ENSMUSG00000020108, ENSMUSG00000020573, ENSMUSG00000031309, ENSMUSG00000011096, ENSMUSG00000036707, ENSMUSG00000050965, ENSMUSG00000070934, ENSMUSG00000028278, ENSMUSG00000004798, ENSMUSG00000058655, ENSMUSG00000032462, ENSMUSG00000063065	1518	59	7720	1.72395	0.987309	0.0544469	18.2865
mmu00760:Nicotinate and nicotinamide metabolism	13	0.359017	0.0186949	ENSMUSG00000021871, ENSMUSG00000032271, ENSMUSG00000029084, ENSMUSG00000020736, ENSMUSG00000029780, ENSMUSG00000022574, ENSMUSG00000020572, ENSMUSG00000054958, ENSMUSG00000032420, ENSMUSG00000068417, ENSMUSG00000029063, ENSMUSG00000022253, ENSMUSG00000037370	1518	33	7720	2.00343	0.995556	0.0662625	22.1574
mmu00520:Amino sugar and nucleotide sugar metabolism	17	0.469484	0.0215453	ENSMUSG00000025877, ENSMUSG00000029992, ENSMUSG00000001891, ENSMUSG00000036820, ENSMUSG00000025232, ENSMUSG00000000628, ENSMUSG00000025791, ENSMUSG00000022570, ENSMUSG00000026670, ENSMUSG00000057363, ENSMUSG00000028479, ENSMUSG00000036427, ENSMUSG00000026456, ENSMUSG00000028621, ENSMUSG00000034744, ENSMUSG00000037012, ENSMUSG00000070284	1518	49	7720	1.76441	0.998072	0.0751637	25.1055
mmu04540:Gap junction	26	0.718034	0.0226211	ENSMUSG00000024383, ENSMUSG00000023004, ENSMUSG00000034781, ENSMUSG00000024639, ENSMUSG00000026228, ENSMUSG00000028019, ENSMUSG00000030137, ENSMUSG00000035027, ENSMUSG00000050965, ENSMUSG00000058672, ENSMUSG00000026202, ENSMUSG00000062380, ENSMUSG00000043091, ENSMUSG00000063065, ENSMUSG00000051177, ENSMUSG00000020654, ENSMUSG00000030265, ENSMUSG00000004936, ENSMUSG00000042644, ENSMUSG00000005034,…	1518	86	7720	1.53752	0.998594	0.0778724	26.1911
